# Supplementary material for: Activated Protein C Ameliorates Tubular Mitochondrial Reactive Oxygen Species and Inflammation in Diabetic Kidney Disease
Source: Nutrients. 2022 Jul 29;14(15):3138. doi: 10.3390/nu14153138 (PMC9370435; doi:10.3390/nu14153138)
Supplement: Supplementary file 1 [file nutrients-14-03138-s001.zip › Supplementary File S1.xlsx]

## Sheet: hPC-DM vs WT-DM mice
Log Ratio	p-value	ID	Notes	Symbol	Entrez Gene Name	Location	Type(s)	Drug(s)
3.967	0.0802	Slco1a1		Slco1a1 (rat)	solute carrier organic anion transporter family, member 1a1	Plasma Membrane	transporter
3.277	0.0479	Pzp		Pzp	pregnancy zone protein	Extracellular Space	other
2.327	0.0158	Fcamr		FCAMR	Fc receptor, IgA, IgM, high affinity	Plasma Membrane	transmembrane receptor
2.154	0.0951	Ugt2b37		UGT2B17	UDP glucuronosyltransferase 2 family, polypeptide B17	Cytoplasm	enzyme
2.133	0.0232	4930502E18Rik		CXorf48	chromosome X open reading frame 48	unknown	other
1.945	0.00656	Lipo1		Lipo1 (includes others)	lipase, member O2	unknown	other
1.882	0.0914	Timd2		Timd2	T cell immunoglobulin and mucin domain containing 2	Plasma Membrane	other
1.859	0.0482	Azgp1		AZGP1	alpha-2-glycoprotein 1, zinc-binding	Extracellular Space	transporter
1.811	0.0163	Ugt2b38	D	UGT2B15	UDP glucuronosyltransferase 2 family, polypeptide B15	Cytoplasm	enzyme
1.7	0.0061	Inmt		INMT	indolethylamine N-methyltransferase	Cytoplasm	enzyme
1.688	0.0138	C1qtnf3		C1QTNF3	C1q and tumor necrosis factor related protein 3	Extracellular Space	other
1.661	0.01	Akr1c14		Akr1c14	aldo-keto reductase family 1, member C14	Cytoplasm	enzyme
1.489	0.0401	Cyp4b1		CYP4B1	cytochrome P450, family 4, subfamily B, polypeptide 1	Cytoplasm	enzyme
1.463	0.00724	Tc2n		TC2N	tandem C2 domains, nuclear	Nucleus	transporter
1.444	0.0672	Fmo5		FMO5	flavin containing monooxygenase 5	Cytoplasm	enzyme
1.431	0.00254	Cndp1		CNDP1	carnosine dipeptidase 1 (metallopeptidase M20 family)	Cytoplasm	peptidase
1.427	0.0855	Gm5631
1.415	0.0124	Hrg		HRG	histidine-rich glycoprotein	Extracellular Space	other
1.394	0.00254	Aacs		AACS	acetoacetyl-CoA synthetase	Cytoplasm	enzyme
1.366	0.0506	Ctxn3		CTXN3	cortexin 3	unknown	other
1.363	0.00254	Pde6a		PDE6A	phosphodiesterase 6A, cGMP-specific, rod, alpha	Plasma Membrane	enzyme
1.361	0.0695	Cyp4a12a	D	CYP4A22	cytochrome P450, family 4, subfamily A, polypeptide 22	Cytoplasm	enzyme
1.321	0.00457	Degs2		DEGS2	delta(4)-desaturase, sphingolipid 2	Cytoplasm	enzyme
1.275	0.0989	Pigr		PIGR	polymeric immunoglobulin receptor	Plasma Membrane	transporter
1.261	0.03	Agxt2l1		AGXT2L1	alanine-glyoxylate aminotransferase 2-like 1	unknown	enzyme
1.256	0.0396	Apoh		APOH	apolipoprotein H (beta-2-glycoprotein I)	Extracellular Space	transporter
1.249	0.0165	Serpinf2		SERPINF2	serpin peptidase inhibitor, clade F (alpha-2 antiplasmin, pigment epithelium derived factor), member 2	Extracellular Space	other
1.244	0.0061	Rorc		RORC	RAR-related orphan receptor C	Nucleus	ligand-dependent nuclear receptor
1.236	0.0638	Snx31		SNX31	sorting nexin 31	unknown	other
1.234	0.0199	Cndp2		CNDP2	CNDP dipeptidase 2 (metallopeptidase M20 family)	Cytoplasm	peptidase
1.231	0.00767	Ces2c	D	Ces2b/Ces2c	carboxylesterase 2C	Cytoplasm	enzyme
1.206	0.0136	BC026439		Slc22a22	solute carrier family 22 (organic cation transporter), member 22	unknown	other
1.192	0.00254	Odc1	D	ODC1	ornithine decarboxylase 1	Cytoplasm	enzyme	tazarotene, eflornithine
1.167	0.00546	ENSMUST00000119135
1.159	0.00952	Smcp		SMCP	sperm mitochondria-associated cysteine-rich protein	Cytoplasm	other
1.133	0.0215	Mogat1		MOGAT1	monoacylglycerol O-acyltransferase 1	Cytoplasm	enzyme
1.123	0.0232	Ces1f		Ces1f/Cesl1	carboxylesterase 1F	Cytoplasm	other
1.112	0.00568	Odc1	D	ODC1	ornithine decarboxylase 1	Cytoplasm	enzyme	tazarotene, eflornithine
1.097	0.0421	Cyp4a12b	D	CYP4A22	cytochrome P450, family 4, subfamily A, polypeptide 22	Cytoplasm	enzyme
1.08	0.0351	Itih2		ITIH2	inter-alpha-trypsin inhibitor heavy chain 2	Extracellular Space	other
1.078	0.00952	Ugt2b5	D	UGT2B15	UDP glucuronosyltransferase 2 family, polypeptide B15	Cytoplasm	enzyme
1.075	0.0127	Hsd17b11		HSD17B11	hydroxysteroid (17-beta) dehydrogenase 11	Cytoplasm	enzyme
1.07	0.00254	ENSMUST00000119836
1.062	0.0104	Bco2		BCO2	beta-carotene oxygenase 2	unknown	enzyme
1.056	0.0182	Nat8		NAT8	N-acetyltransferase 8 (GCN5-related, putative)	Nucleus	transcription regulator
1.042	0.006	GENSCAN00000029169
1.039	0.00862	Zdhhc2		ZDHHC2	zinc finger, DHHC-type containing 2	Nucleus	enzyme
1.038	0.0553	Cml5		Cml5	camello-like 5	unknown	enzyme
1.035	0.0175	Sucnr1		SUCNR1	succinate receptor 1	Plasma Membrane	G-protein coupled receptor
1.03	0.00603	GENSCAN00000034770
1.02	0.00952	Aspg		ASPG	asparaginase homolog (S, cerevisiae)	unknown	enzyme
1.015	0.0115	Slc46a3		SLC46A3	solute carrier family 46, member 3	Extracellular Space	other
1.013	0.00124	Nepn		Nepn	nephrocan	Extracellular Space	other
1.006	0.0132	Vill		VILL	villin-like	Cytoplasm	other
1.006	0.0397	Mphosph6		MPHOSPH6	M-phase phosphoprotein 6	Nucleus	other
1.004	0.0136	Tgm1		TGM1	transglutaminase 1 (K polypeptide epidermal type I, protein-glutamine-gamma-glutamyltransferase)	Plasma Membrane	enzyme
1.002	0.0106	Ldhd		LDHD	lactate dehydrogenase D	Cytoplasm	enzyme
0.987	0.00519	Amacr		AMACR	alpha-methylacyl-CoA racemase	Cytoplasm	enzyme
0.982	0.00862	Ttc39c		TTC39C	tetratricopeptide repeat domain 39C	unknown	other
0.98	0.0133	Galns		GALNS	galactosamine (N-acetyl)-6-sulfate sulfatase	Cytoplasm	enzyme
0.973	0.00254	Stxbp5l		STXBP5L	syntaxin binding protein 5-like	Cytoplasm	other
0.97	0.0408	Cbs		CBS	cystathionine-beta-synthase	Cytoplasm	enzyme
0.947	0.0169	Cntnap5a		CNTNAP5	contactin associated protein-like 5	unknown	other
0.938	0.0161	Ces2d-ps		Ces2d-ps	carboxylesterase 2D, pseudogene	unknown	other
0.932	0.000166	Ces1e		Ces1e	carboxylesterase 1E	Cytoplasm	enzyme
0.931	0.0411	C8g		C8G	complement component 8, gamma polypeptide	Extracellular Space	transporter
0.913	0.01	Gys2		GYS2	glycogen synthase 2 (liver)	Cytoplasm	enzyme
0.912	0.0115	Hapln1		HAPLN1	hyaluronan and proteoglycan link protein 1	Extracellular Space	other
0.91	0.0207	Proc		PROC	protein C (inactivator of coagulation factors Va and VIIIa)	Extracellular Space	peptidase
0.899	0.0057	Zfp810		ZNF157	zinc finger protein 157	Nucleus	transcription regulator
0.89	0.0833	Cd36		CD36	CD36 molecule (thrombospondin receptor)	Plasma Membrane	transmembrane receptor
0.886	0.00254	Afmid		Afmid	arylformamidase	unknown	other
0.885	0.00546	Ephx2		EPHX2	epoxide hydrolase 2, cytoplasmic	Cytoplasm	enzyme
0.883	0.093	Cyp2d12		CYP2D6	cytochrome P450, family 2, subfamily D, polypeptide 6	Cytoplasm	enzyme	dextromethorphan/quinidine, quinidine
0.878	0.00273	BC048355		C6orf108	chromosome 6 open reading frame 108	Nucleus	other
0.876	0.0133	ENSMUST00000098839		Gm15441	predicted gene 15441	unknown	other
0.865	0.0406	Atp11a		ATP11A	ATPase, class VI, type 11A	Plasma Membrane	transporter
0.863	0.01	ENSMUST00000082493
0.858	0.00959	Car9		CA9	carbonic anhydrase IX	Nucleus	enzyme	girentuximab, I 131 chimeric G250, Y 90 chimeric G250, methazolamide, hydrochlorothiazide, acetazolamide, trichloromethiazide, chlorothiazide, chlorthalidone, benzthiazide, sulfacetamide, topiramate
0.856	0.006	Rpp40		RPP40	ribonuclease P/MRP 40kDa subunit	Nucleus	enzyme
0.849	0.004	Dnajc12		DNAJC12	DnaJ (Hsp40) homolog, subfamily C, member 12	unknown	other
0.849	0.0262	Mep1b		MEP1B	meprin A, beta	Plasma Membrane	peptidase
0.845	0.0238	Chst7		CHST7	carbohydrate (N-acetylglucosamine 6-O) sulfotransferase 7	Cytoplasm	enzyme
0.845	0.0601	Mpped1		MPPED1	metallophosphoesterase domain containing 1	unknown	other
0.843	0.00254	Als2cr4		TMEM237	transmembrane protein 237	unknown	other
0.839	0.0158	Asxl3		ASXL3	additional sex combs like 3 (Drosophila)	unknown	other
0.835	0.0074	Tmco3		TMCO3	transmembrane and coiled-coil domains 3	unknown	transporter
0.834	0.0054	Tmem178		TMEM178	transmembrane protein 178	unknown	other
0.831	0.00975	Paqr7		PAQR7	progestin and adipoQ receptor family member VII	unknown	other
0.825	0.0615	Ces1g		CES1	carboxylesterase 1	Cytoplasm	enzyme
0.824	0.0271	Slco3a1		SLCO3A1	solute carrier organic anion transporter family, member 3A1	Plasma Membrane	transporter
0.821	0.0054	Clip4		CLIP4	CAP-GLY domain containing linker protein family, member 4	unknown	other
0.82	0.0128	Rhov		RHOV	ras homolog family member V	Plasma Membrane	enzyme
0.818	0.00297	Anxa13		ANXA13	annexin A13	Plasma Membrane	other
0.818	0.00826	Rhobtb1		RHOBTB1	Rho-related BTB domain containing 1	unknown	enzyme
0.814	0.0054	Tmtc4		TMTC4	transmembrane and tetratricopeptide repeat containing 4	unknown	other
0.811	0.00254	Coasy		COASY	CoA synthase	Cytoplasm	kinase
0.811	0.0127	Nt5dc2		NT5DC2	5'-nucleotidase domain containing 2	unknown	other
0.799	0.0157	Cml2		Cml2/LOC681227	camello-like 2	unknown	other
0.796	0.0444	Adamts15		ADAMTS15	ADAM metallopeptidase with thrombospondin type 1 motif, 15	Extracellular Space	peptidase
0.789	0.0399	5033411D12Rik		C7orf10	chromosome 7 open reading frame 10	Cytoplasm	other
0.786	0.01	Slc30a2		SLC30A2	solute carrier family 30 (zinc transporter), member 2	Plasma Membrane	transporter
0.78	0.0281	Sectm1b		Sectm1b	secreted and transmembrane 1B	Extracellular Space	cytokine
0.774	0.03	Hsd11b1		HSD11B1	hydroxysteroid (11-beta) dehydrogenase 1	Cytoplasm	enzyme
0.771	0.0238	Slc35d2		SLC35D2	solute carrier family 35, member D2	Cytoplasm	transporter
0.768	0.00578	2410066E13Rik		C7orf41	chromosome 7 open reading frame 41	unknown	other
0.762	0.00952	Aldh3a2		ALDH3A2	aldehyde dehydrogenase 3 family, member A2	Cytoplasm	enzyme
0.761	0.0312	Treh		TREH	trehalase (brush-border membrane glycoprotein)	Plasma Membrane	enzyme
0.758	0.0265	Acsm2		ACSM2A	acyl-CoA synthetase medium-chain family member 2A	Cytoplasm	enzyme
0.755	0.0159	Agphd1		AGPHD1	aminoglycoside phosphotransferase domain containing 1	unknown	other
0.751	0.0248	Pank1	D	PANK1	pantothenate kinase 1	Cytoplasm	kinase
0.749	0.0265	Macrod2		MACROD2	MACRO domain containing 2	unknown	enzyme
0.748	0.00952	Gm128		C1orf56	chromosome 1 open reading frame 56	unknown	other
0.743	0.00652	Def8		DEF8	differentially expressed in FDCP 8 homolog (mouse)	unknown	other
0.739	0.082	ENSMUST00000121081
0.736	0.0848	ENSMUST00000158731
0.735	0.032	Cmtm6		CMTM6	CKLF-like MARVEL transmembrane domain containing 6	Extracellular Space	cytokine
0.734	0.0255	Tcea3		TCEA3	transcription elongation factor A (SII), 3	Nucleus	transcription regulator
0.732	0.0609	Me1	D	ME1	malic enzyme 1, NADP(+)-dependent, cytosolic	Cytoplasm	enzyme
0.726	0.0261	Ces2b	D	Ces2b/Ces2c	carboxylesterase 2C	Cytoplasm	enzyme
0.725	0.0104	Pecr		PECR	peroxisomal trans-2-enoyl-CoA reductase	Cytoplasm	enzyme
0.724	0.00457	Slc17a3		SLC17A3	solute carrier family 17 (sodium phosphate), member 3	Plasma Membrane	transporter
0.724	0.0194	Esm1		ESM1	endothelial cell-specific molecule 1	Extracellular Space	growth factor
0.724	0.032	Agps		AGPS	alkylglycerone phosphate synthase	Cytoplasm	enzyme
0.721	0.0315	Fbxl2		FBXL2	F-box and leucine-rich repeat protein 2	Cytoplasm	enzyme
0.72	0.0228	Sdc2		SDC2	syndecan 2	Plasma Membrane	other
0.716	0.00765	Tmem150a		TMEM150A	transmembrane protein 150A	unknown	other
0.713	0.0557	Ace		ACE	angiotensin I converting enzyme (peptidyl-dipeptidase A) 1	Plasma Membrane	peptidase	pentopril, perindoprilat, amlodipine/benazepril, lisinopril/hydrochlorothiazide, benazepril, enalapril, perindopril, captopril, enalapril/felodipine, hydrochlorothiazide/moexipril, benazepril/hydrochlorothiazide, hydrochlorothiazide/quinapril, fosinopril/
0.712	0.0519	Ankrd29		ANKRD29	ankyrin repeat domain 29	unknown	other
0.71	0.0644	Pank1	D	PANK1	pantothenate kinase 1	Cytoplasm	kinase
0.707	0.0313	Fhl1		FHL1 (includes EG:14199)	four and a half LIM domains 1	Cytoplasm	other
0.706	0.053	Tspan13		TSPAN13	tetraspanin 13	Plasma Membrane	other
0.705	0.0115	Gas2		GAS2 (includes EG:14453)	growth arrest-specific 2	Cytoplasm	other
0.704	0.0616	Tmigd1		TMIGD1	transmembrane and immunoglobulin domain containing 1	unknown	other
0.703	0.00573	Hsd3b3		HSD3B2	hydroxy-delta-5-steroid dehydrogenase, 3 beta- and steroid delta-isomerase 2	Cytoplasm	enzyme	trilostane
0.703	0.032	Hnf4g		HNF4G	hepatocyte nuclear factor 4, gamma	Nucleus	transcription regulator
0.703	0.0386	Osta		OSTalpha	organic solute transporter alpha	Plasma Membrane	transporter
0.701	0.027	Fuca2		FUCA2	fucosidase, alpha-L- 2, plasma	Extracellular Space	enzyme
0.699	0.00925	Acox3		ACOX3	acyl-CoA oxidase 3, pristanoyl	Cytoplasm	enzyme
0.698	0.00254	Sh3gl2		SH3GL2	SH3-domain GRB2-like 2	Plasma Membrane	enzyme
0.697	0.0189	Trdn	D	TRDN	triadin	Cytoplasm	other
0.696	0.0175	St8sia1		ST8SIA1	ST8 alpha-N-acetyl-neuraminide alpha-2,8-sialyltransferase 1	Cytoplasm	enzyme
0.694	0.0158	D4Bwg0951e		LURAP1L	leucine rich adaptor protein 1-like	unknown	other
0.694	0.0649	GENSCAN00000019167
0.693	0.0437	Ivd		IVD	isovaleryl-CoA dehydrogenase	Cytoplasm	enzyme
0.692	0.00471	Sephs2		SEPHS2	selenophosphate synthetase 2	unknown	enzyme
0.692	0.00559	Fmnl1		FMNL1	formin-like 1	Cytoplasm	other
0.692	0.00862	Ppt2		PPT2 (includes EG:100126133)	palmitoyl-protein thioesterase 2	Cytoplasm	enzyme
0.691	0.006	Defb29		DEFB116	defensin, beta 116	Extracellular Space	other
0.691	0.0106	Csad		CSAD	cysteine sulfinic acid decarboxylase	Cytoplasm	enzyme
0.69	0.053	Etv1	D	ETV1	ets variant 1	Nucleus	transcription regulator
0.684	0.0143	Pdk3		PDK3	pyruvate dehydrogenase kinase, isozyme 3	Cytoplasm	kinase
0.683	0.0449	Mas1		MAS1	MAS1 oncogene	Plasma Membrane	G-protein coupled receptor
0.683	0.058	Rnf183		RNF183	ring finger protein 183	unknown	other
0.676	0.0231	Synpr		SYNPR	synaptoporin	Plasma Membrane	transporter
0.675	0.0257	Fbxl21		FBXL21	F-box and leucine-rich repeat protein 21 (gene/pseudogene)	unknown	enzyme
0.674	0.0663	Slc6a9		SLC6A9	solute carrier family 6 (neurotransmitter transporter, glycine), member 9	Plasma Membrane	transporter
0.673	0.00387	Aspdh		ASPDH	aspartate dehydrogenase domain containing	unknown	other
0.67	0.00711	Nudt19	D	NUDT19	nudix (nucleoside diphosphate linked moiety X)-type motif 19	Cytoplasm	other
0.669	0.00451	Zmynd10		ZMYND10	zinc finger, MYND-type containing 10	Cytoplasm	other
0.666	0.0399	Erc2		ERC2	ELKS/RAB6-interacting/CAST family member 2	Cytoplasm	other
0.666	0.0912	Mkrn1		Mkrn1	makorin ring finger protein 1	unknown	other
0.665	0.057	Nr1h4		NR1H4	nuclear receptor subfamily 1, group H, member 4	Nucleus	ligand-dependent nuclear receptor
0.662	0.0162	Crot		CROT	carnitine O-octanoyltransferase	Cytoplasm	enzyme
0.66	0.00954	Entpd4		ENTPD4	ectonucleoside triphosphate diphosphohydrolase 4	Cytoplasm	enzyme
0.657	0.0796	Osbp2		OSBP2	oxysterol binding protein 2	Cytoplasm	other
0.654	0.00665	Acot11		ACOT11	acyl-CoA thioesterase 11	Cytoplasm	enzyme
0.649	0.0375	Etv1	D	ETV1	ets variant 1	Nucleus	transcription regulator
0.647	0.004	Fam195a		FAM195A	family with sequence similarity 195, member A	unknown	other
0.647	0.0663	Glrx		GLRX	glutaredoxin (thioltransferase)	Cytoplasm	enzyme
0.641	0.0843	Me1	D	ME1	malic enzyme 1, NADP(+)-dependent, cytosolic	Cytoplasm	enzyme
0.639	0.00254	Ttc36		TTC36	tetratricopeptide repeat domain 36	unknown	other
0.638	0.00756	Tpk1		TPK1	thiamin pyrophosphokinase 1	Cytoplasm	kinase
0.637	0.0143	Plekha8		PLEKHA8	pleckstrin homology domain containing, family A (phosphoinositide binding specific) member 8	Extracellular Space	other
0.636	0.0136	Acot12		ACOT12	acyl-CoA thioesterase 12	Cytoplasm	enzyme
0.636	0.0511	Snora31		Snora31	small nucleolar RNA, H/ACA box 31	unknown	other
0.635	0.0282	Cpox		CPOX	coproporphyrinogen oxidase	Cytoplasm	enzyme
0.633	0.0668	Gm11992		C7orf57	chromosome 7 open reading frame 57	unknown	other
0.63	0.0585	Pion		PION	pigeon homolog (Drosophila)	Cytoplasm	peptidase
0.629	0.00601	Rgl1		RGL1	ral guanine nucleotide dissociation stimulator-like 1	Cytoplasm	other
0.628	0.004	Glyat		GLYAT	glycine-N-acyltransferase	Cytoplasm	enzyme
0.628	0.009	Gpr137b-ps		Gpr137b-ps	G protein-coupled receptor 137B, pseudogene	unknown	other
0.627	0.0184	Acat1		ACAT1	acetyl-CoA acetyltransferase 1	Cytoplasm	enzyme
0.627	0.0185	Bdh2		BDH2 (includes EG:295458)	3-hydroxybutyrate dehydrogenase, type 2	Cytoplasm	enzyme
0.625	0.01	1700026J04Rik		FAM217A	family with sequence similarity 217, member A	Extracellular Space	other
0.622	0.006	Slc35f3		SLC35F3	solute carrier family 35, member F3	unknown	other
0.618	0.0271	Phlda2		PHLDA2	pleckstrin homology-like domain, family A, member 2	Cytoplasm	other
0.618	0.0541	Irf6		IRF6	interferon regulatory factor 6	Nucleus	transcription regulator
0.615	0.00471	Anks1b		ANKS1B	ankyrin repeat and sterile alpha motif domain containing 1B	Nucleus	other
0.613	0.0506	Lonrf3		LONRF3	LON peptidase N-terminal domain and ring finger 3	unknown	other
0.612	0.0207	Slc1a4		SLC1A4	solute carrier family 1 (glutamate/neutral amino acid transporter), member 4	Plasma Membrane	transporter	riluzole
0.61	0.0225	Galnt1		GALNT1	UDP-N-acetyl-alpha-D-galactosamine:polypeptide N-acetylgalactosaminyltransferase 1 (GalNAc-T1)	Cytoplasm	enzyme
0.609	0.0396	2310046K01Rik
0.607	0.00254	Neu2		NEU2	sialidase 2 (cytosolic sialidase)	Cytoplasm	enzyme
0.607	0.00662	Rabggta		RABGGTA	Rab geranylgeranyltransferase, alpha subunit	Extracellular Space	enzyme
0.607	0.00862	Selenbp1	D	SELENBP1	selenium binding protein 1	Cytoplasm	other
0.607	0.0553	Etnk2		ETNK2	ethanolamine kinase 2	unknown	kinase
0.6	0.0144	Dhfr		DHFR	dihydrofolate reductase	Nucleus	enzyme	pyrimethamine, trimethoprim, iclaprim, pralatrexate, methotrexate, sulfisoxazole, triamterene, folic acid, trimetrexate, LY231514, PT 523
0.599	0.0773	Slc12a6		SLC12A6	solute carrier family 12 (potassium/chloride transporters), member 6	Plasma Membrane	transporter
0.598	0.00254	Sf3b5		SF3B5	splicing factor 3b, subunit 5, 10kDa	Nucleus	other
0.598	0.0186	Lypla1		LYPLA1	lysophospholipase I	Cytoplasm	enzyme
0.592	0.0349	Olfr153		Olfr153	olfactory receptor 153	Plasma Membrane	G-protein coupled receptor
0.592	0.0761	ENSMUST00000099693		Gm10804	predicted gene 10804	unknown	other
0.592	0.0773	Klf9		KLF9	Kruppel-like factor 9	Nucleus	transcription regulator
0.589	0.0199	D9Ertd402e		C3orf23	chromosome 3 open reading frame 23	Cytoplasm	other
0.589	0.073	Smarca2		SMARCA2	SWI/SNF related, matrix associated, actin dependent regulator of chromatin, subfamily a, member 2	Nucleus	transcription regulator
0.587	0.0127	Tnfaip8		TNFAIP8	tumor necrosis factor, alpha-induced protein 8	Cytoplasm	other
0.587	0.0225	D630029K05Rik		D630029K05Rik	RIKEN cDNA D630029K05 gene	unknown	other
0.585	0.0554	Spsb2		SPSB2	splA/ryanodine receptor domain and SOCS box containing 2	unknown	other
0.584	0.0406	Arsb	D	ARSB	arylsulfatase B	Cytoplasm	enzyme
0.583	0.0942	Npm3		NPM3	nucleophosmin/nucleoplasmin 3	Nucleus	other
0.582	0.0915	Nat2		NAT1 (includes EG:116632)	N-acetyltransferase 1 (arylamine N-acetyltransferase)	Cytoplasm	enzyme
0.58	0.00296	Mlycd		MLYCD	malonyl-CoA decarboxylase	Cytoplasm	enzyme
0.58	0.0054	Fam132a		FAM132A	family with sequence similarity 132, member A	Extracellular Space	other
0.577	0.0938	Sun3		SUN3	Sad1 and UNC84 domain containing 3	unknown	other
0.575	0.0275	Lztr1		LZTR1	leucine-zipper-like transcription regulator 1	Cytoplasm	transcription regulator
0.573	0.0414	Acad9		ACAD9	acyl-CoA dehydrogenase family, member 9	Cytoplasm	enzyme
0.573	0.0466	Rarres2		RARRES2	retinoic acid receptor responder (tazarotene induced) 2	Plasma Membrane	transmembrane receptor
0.571	0.00471	Gpr137b		GPR137B	G protein-coupled receptor 137B	Plasma Membrane	other
0.571	0.0663	Gusb		GUSB	glucuronidase, beta	Cytoplasm	enzyme
0.568	0.0177	Mtor		MTOR	mechanistic target of rapamycin (serine/threonine kinase)	Nucleus	kinase	deforolimus, OSI-027, NVP-BEZ235, temsirolimus, tacrolimus, everolimus
0.566	0.014	Hexb		HEXB	hexosaminidase B (beta polypeptide)	Cytoplasm	enzyme
0.566	0.0517	Ncam2		NCAM2	neural cell adhesion molecule 2	Plasma Membrane	other
0.565	0.00767	Slc47a1		SLC47A1	solute carrier family 47, member 1	Plasma Membrane	transporter
0.564	0.0506	Prok1		PROK1	prokineticin 1	Extracellular Space	growth factor
0.563	0.0193	Ctbs		CTBS	chitobiase, di-N-acetyl-	Cytoplasm	enzyme
0.562	0.00572	Dnajc22		DNAJC22	DnaJ (Hsp40) homolog, subfamily C, member 22	unknown	other
0.562	0.0384	Ptplb		PTPLB	protein tyrosine phosphatase-like (proline instead of catalytic arginine), member b	Cytoplasm	phosphatase
0.56	0.0176	Hs6st2		HS6ST2	heparan sulfate 6-O-sulfotransferase 2	Plasma Membrane	enzyme
0.559	0.00254	Lrrc28		LRRC28	leucine rich repeat containing 28	unknown	other
0.558	0.0942	Dnase1		DNASE1	deoxyribonuclease I	Extracellular Space	enzyme
0.557	0.0511	Glt1d1		GLT1D1	glycosyltransferase 1 domain containing 1	Extracellular Space	enzyme
0.555	0.023	Acss2		ACSS2	acyl-CoA synthetase short-chain family member 2	Cytoplasm	enzyme
0.555	0.031	H2-t9
0.555	0.0405	Blmh		BLMH	bleomycin hydrolase	Cytoplasm	peptidase
0.555	0.0582	Tmem56		TMEM56	transmembrane protein 56	unknown	other
0.554	0.00493	0610012H03Rik		0610012H03Rik	RIKEN cDNA 0610012H03 gene	Cytoplasm	other
0.552	0.00296	Vil1		VIL1	villin 1	Cytoplasm	other
0.552	0.0143	Mpped2		MPPED2	metallophosphoesterase domain containing 2	unknown	other
0.552	0.0682	Glb1		GLB1	galactosidase, beta 1	Cytoplasm	enzyme
0.551	0.0158	2510049J12Rik		LOC100129480	uncharacterized LOC100129480	unknown	other
0.55	0.00603	Ahcy	D	AHCY	adenosylhomocysteinase	Cytoplasm	enzyme	9-(2',3'-dihydroxycyclopent-4'-enyl)adenine, 3-deazaneplanocin, neplanocin A, 3-deazaaristeromycin, cyanovirin-N, 6'-C-methylneplanocin A
0.55	0.0158	Slc25a42		SLC25A42	solute carrier family 25, member 42	Cytoplasm	transporter
0.55	0.0347	Pi4ka		PI4KA	phosphatidylinositol 4-kinase, catalytic, alpha	Cytoplasm	kinase
0.549	0.0136	Mkrn1-ps1
0.548	0.0437	Aass		AASS	aminoadipate-semialdehyde synthase	Cytoplasm	enzyme
0.547	0.0119	Cfb		CFB	complement factor B	Extracellular Space	peptidase
0.546	0.0069	Ahcy	D	AHCY	adenosylhomocysteinase	Cytoplasm	enzyme	9-(2',3'-dihydroxycyclopent-4'-enyl)adenine, 3-deazaneplanocin, neplanocin A, 3-deazaaristeromycin, cyanovirin-N, 6'-C-methylneplanocin A
0.546	0.0143	Enpp3		ENPP3	ectonucleotide pyrophosphatase/phosphodiesterase 3	Plasma Membrane	enzyme
0.543	0.0246	Sap30		SAP30 (includes EG:60406)	Sin3A-associated protein, 30kDa	Nucleus	transcription regulator
0.542	0.0466	Slc11a2		SLC11A2	solute carrier family 11 (proton-coupled divalent metal ion transporters), member 2	Plasma Membrane	transporter
0.542	0.0544	Ido2		IDO2	indoleamine 2,3-dioxygenase 2	Cytoplasm	enzyme
0.541	0.0106	Sectm1a		SECTM1	secreted and transmembrane 1	Extracellular Space	cytokine
0.541	0.0415	Wdr55		WDR55	WD repeat domain 55	Nucleus	other
0.54	0.0694	Abhd3		ABHD3	abhydrolase domain containing 3	unknown	enzyme
0.539	0.00656	Grtp1		GRTP1	growth hormone regulated TBC protein 1	unknown	other
0.539	0.0469	Arsb	D	ARSB	arylsulfatase B	Cytoplasm	enzyme
0.538	0.00952	Apeh		APEH	N-acylaminoacyl-peptide hydrolase	Cytoplasm	peptidase
0.538	0.0104	Evc		EVC	Ellis van Creveld syndrome	Cytoplasm	other
0.537	0.0248	E130306D19Rik		C9orf100	chromosome 9 open reading frame 100	unknown	other
0.537	0.0302	Trdn	D	TRDN	triadin	Cytoplasm	other
0.537	0.0919	Nxt2		NXT2	nuclear transport factor 2-like export factor 2	Nucleus	transporter
0.536	0.0117	Rnaseh2b		RNASEH2B	ribonuclease H2, subunit B	Nucleus	other
0.536	0.058	Slc35a3		SLC35A3	solute carrier family 35 (UDP-N-acetylglucosamine (UDP-GlcNAc) transporter), member A3	Cytoplasm	transporter
0.535	0.00254	0610011F06Rik		C16orf13	chromosome 16 open reading frame 13	unknown	other
0.533	0.0783	Cym		Cym	chymosin	unknown	peptidase
0.532	0.0306	Haao		HAAO	3-hydroxyanthranilate 3,4-dioxygenase	Cytoplasm	enzyme
0.532	0.0506	Herc4		HERC4	HECT and RLD domain containing E3 ubiquitin protein ligase 4	Cytoplasm	enzyme
0.531	0.0189	Slc16a2		SLC16A2	solute carrier family 16, member 2 (thyroid hormone transporter)	Plasma Membrane	transporter
0.53	0.0319	Fbxo40		FBXO40	F-box protein 40	Cytoplasm	other
0.529	0.00952	Pet112l		PET112	PET112 homolog (yeast)	Cytoplasm	translation regulator
0.528	0.0961	Gm906		Gm8672 (includes others)	predicted gene 906	unknown	other
0.527	0.00952	Slc17a1		SLC17A1	solute carrier family 17 (sodium phosphate), member 1	Plasma Membrane	transporter
0.526	0.0401	Fbxo7		FBXO7	F-box protein 7	Cytoplasm	enzyme
0.525	0.0232	Trib2		Trib2	tribbles homolog 2 (Drosophila)	unknown	other
0.524	0.0143	D930014E17Rik		AKIP1	A kinase (PRKA) interacting protein 1	Nucleus	other
0.524	0.0553	Dnaja4		DNAJA4	DnaJ (Hsp40) homolog, subfamily A, member 4	Nucleus	other
0.523	0.00656	Ahcy	D	AHCY	adenosylhomocysteinase	Cytoplasm	enzyme	9-(2',3'-dihydroxycyclopent-4'-enyl)adenine, 3-deazaneplanocin, neplanocin A, 3-deazaaristeromycin, cyanovirin-N, 6'-C-methylneplanocin A
0.523	0.0161	Slc1a2		SLC1A2	solute carrier family 1 (glial high affinity glutamate transporter), member 2	Plasma Membrane	transporter	riluzole
0.523	0.0457	Dgkh		DGKH	diacylglycerol kinase, eta	Cytoplasm	kinase
0.523	0.099	Bsdc1		BSDC1	BSD domain containing 1	unknown	other
0.522	0.029	Gm4979
0.522	0.0714	Nusap1		NUSAP1	nucleolar and spindle associated protein 1	Nucleus	other
0.521	0.0104	Med21		MED21	mediator complex subunit 21	Nucleus	transcription regulator
0.521	0.0638	Ttc8		TTC8	tetratricopeptide repeat domain 8	Cytoplasm	other
0.519	0.0198	Cryz		CRYZ	crystallin, zeta (quinone reductase)	Cytoplasm	enzyme
0.519	0.0336	Rnls		RNLS	renalase, FAD-dependent amine oxidase	Extracellular Space	other
0.518	0.0245	Ifrd2		IFRD2	interferon-related developmental regulator 2	unknown	other
0.517	0.00547	Dnajc19	D	DNAJC19	DnaJ (Hsp40) homolog, subfamily C, member 19	Cytoplasm	other
0.517	0.0159	Fras1		FRAS1	Fraser syndrome 1	Extracellular Space	other
0.517	0.0261	Slc44a4		SLC44A4	solute carrier family 44, member 4	Plasma Membrane	transporter
0.517	0.0647	Dgkg		DGKG	diacylglycerol kinase, gamma 90kDa	Cytoplasm	kinase
0.516	0.0129	Pink1		PINK1	PTEN induced putative kinase 1	Cytoplasm	kinase
0.516	0.062	Nit2		NIT2	nitrilase family, member 2	Cytoplasm	enzyme
0.514	0.00964	Slc10a5		SLC10A5	solute carrier family 10 (sodium/bile acid cotransporter family), member 5	unknown	other
0.514	0.0128	Glyctk		Glyctk	glycerate kinase	Cytoplasm	kinase
0.514	0.083	Mcm6		MCM6	minichromosome maintenance complex component 6	Nucleus	enzyme
0.512	0.0953	Trim13		TRIM13	tripartite motif containing 13	Cytoplasm	enzyme
0.511	0.00457	Thoc7		THOC7	THO complex 7 homolog (Drosophila)	Nucleus	other
0.511	0.0124	Ctdsp1		CTDSP1	CTD (carboxy-terminal domain, RNA polymerase II, polypeptide A) small phosphatase 1	Nucleus	phosphatase
0.51	0.0426	Chd3		CHD3	chromodomain helicase DNA binding protein 3	Nucleus	enzyme
0.51	0.0664	1810022C23Rik
0.509	0.0343	Bdh1		BDH1 (includes EG:100037356)	3-hydroxybutyrate dehydrogenase, type 1	Cytoplasm	enzyme
0.509	0.0824	Sptlc1		SPTLC1	serine palmitoyltransferase, long chain base subunit 1	Cytoplasm	enzyme
0.507	0.0306	Hyi		HYI	hydroxypyruvate isomerase (putative)	unknown	enzyme
0.506	0.0215	Kif20b		KIF20B	kinesin family member 20B	Nucleus	enzyme
0.506	0.0426	Dfna5		DFNA5	deafness, autosomal dominant 5	unknown	other
0.506	0.0923	Snrpn		SNRPN	small nuclear ribonucleoprotein polypeptide N	Nucleus	other
0.504	0.004	Acads		ACADS	acyl-CoA dehydrogenase, C-2 to C-3 short chain	Cytoplasm	enzyme
0.504	0.0276	Slc22a2		SLC22A2	solute carrier family 22 (organic cation transporter), member 2	Plasma Membrane	transporter
0.504	0.0604	Enpp6		ENPP6	ectonucleotide pyrophosphatase/phosphodiesterase 6	Cytoplasm	enzyme
0.504	0.0669	Hbegf		HBEGF	heparin-binding EGF-like growth factor	Extracellular Space	growth factor
0.503	0.0163	Mccc1		MCCC1	methylcrotonoyl-CoA carboxylase 1 (alpha)	Cytoplasm	enzyme
0.503	0.0363	ENSMUST00000102341
0.502	0.00952	Fgfr4		FGFR4	fibroblast growth factor receptor 4	Plasma Membrane	kinase
0.502	0.0919	D16H22S680E		C22orf25	chromosome 22 open reading frame 25	Cytoplasm	other
0.501	0.034	2210011C24Rik		LOC113230	uncharacterized LOC113230	unknown	other
0.501	0.0405	Amdhd2		AMDHD2	amidohydrolase domain containing 2	unknown	enzyme
0.501	0.0407	Neurog2		NEUROG2	neurogenin 2	Nucleus	other
0.5	0.00603	Slc22a6		SLC22A6	solute carrier family 22 (organic anion transporter), member 6	Plasma Membrane	transporter
0.497	0.0106	Eml5		EML5	echinoderm microtubule associated protein like 5	unknown	other
0.497	0.0882	Kcnj8		KCNJ8	potassium inwardly-rectifying channel, subfamily J, member 8	Plasma Membrane	ion channel
0.496	0.0401	Acox1		ACOX1	acyl-CoA oxidase 1, palmitoyl	Cytoplasm	enzyme
0.496	0.0885	Aim1		AIM1 (includes EG:11630)	absent in melanoma 1	Extracellular Space	other
0.495	0.0318	Fmo2		FMO2	flavin containing monooxygenase 2 (non-functional)	Cytoplasm	enzyme
0.494	0.0238	Notum		NOTUM	notum pectinacetylesterase homolog (Drosophila)	unknown	other
0.494	0.0559	Rgn		RGN	regucalcin (senescence marker protein-30)	Nucleus	enzyme
0.493	0.0473	Slc30a5		SLC30A5	solute carrier family 30 (zinc transporter), member 5	Plasma Membrane	transporter
0.492	0.0911	Nlrc4		NLRC4	NLR family, CARD domain containing 4	Cytoplasm	other
0.489	0.073	GENSCAN00000034999
0.489	0.0885	Pgcp		CPQ	carboxypeptidase Q	Extracellular Space	peptidase
0.488	0.0359	Map3k15		MAP3K15	mitogen-activated protein kinase kinase kinase 15	unknown	other
0.485	0.0714	Sel1l3		SEL1L3	sel-1 suppressor of lin-12-like 3 (C, elegans)	unknown	other
0.484	0.0801	Wdr31		WDR31	WD repeat domain 31	unknown	peptidase
0.484	0.0822	Fam169b		Fam169b	family with sequence similarity 169, member B	unknown	other
0.483	0.00451	2310039H08Rik		2310039H08Rik	RIKEN cDNA 2310039H08 gene	unknown	other
0.483	0.0375	Gtf2h2		GTF2H2	general transcription factor IIH, polypeptide 2, 44kDa	Nucleus	transcription regulator
0.482	0.0362	Eif3e		EIF3E	eukaryotic translation initiation factor 3, subunit E	Cytoplasm	translation regulator
0.481	0.0087	St8sia6		ST8SIA6	ST8 alpha-N-acetyl-neuraminide alpha-2,8-sialyltransferase 6	Cytoplasm	enzyme
0.481	0.0401	Acy3		ACY3	aspartoacylase (aminocyclase) 3	unknown	enzyme
0.48	0.0104	Pdzd3		PDZD3	PDZ domain containing 3	Plasma Membrane	transporter
0.48	0.0251	Aifm3		AIFM3	apoptosis-inducing factor, mitochondrion-associated, 3	Cytoplasm	enzyme
0.48	0.0374	Xylt1		XYLT1	xylosyltransferase I	Cytoplasm	enzyme
0.479	0.07	Gtpbp4		GTPBP4	GTP binding protein 4	Nucleus	enzyme
0.478	0.0709	Adal		ADAL	adenosine deaminase-like	Cytoplasm	other
0.475	0.0196	Selenbp2	D	SELENBP1	selenium binding protein 1	Cytoplasm	other
0.475	0.0223	Tgm7		Tgm7	transglutaminase 7	unknown	other
0.474	0.00387	Fut8		FUT8	fucosyltransferase 8 (alpha (1,6) fucosyltransferase)	Cytoplasm	enzyme
0.474	0.00952	Arhgap42	D	ARHGAP42	Rho GTPase activating protein 42	unknown	other
0.474	0.0194	Dhtkd1		DHTKD1	dehydrogenase E1 and transketolase domain containing 1	unknown	enzyme
0.474	0.0721	Slc13a5		SLC13A5	solute carrier family 13 (sodium-dependent citrate transporter), member 5	Plasma Membrane	transporter
0.474	0.074	LOC100504608		METTL21B	methyltransferase like 21B	unknown	other
0.473	0.0456	Mpp6		MPP6 (includes EG:35343)	membrane protein, palmitoylated 6 (MAGUK p55 subfamily member 6)	Plasma Membrane	kinase
0.473	0.058	Wdr81		WDR81	WD repeat domain 81	unknown	other
0.471	0.00952	1300010F03Rik		KIAA0564	KIAA0564	Cytoplasm	other
0.471	0.0255	Pipox		PIPOX	pipecolic acid oxidase	Cytoplasm	enzyme
0.471	0.032	Nudt8		NUDT8	nudix (nucleoside diphosphate linked moiety X)-type motif 8	Cytoplasm	other
0.47	0.00437	Ccdc107		CCDC107	coiled-coil domain containing 107	unknown	other
0.47	0.0664	Cyp2j9		Cyp2j9	cytochrome P450, family 2, subfamily j, polypeptide 9	Cytoplasm	enzyme
0.47	0.0794	Nhp2		NHP2	NHP2 ribonucleoprotein homolog (yeast)	Nucleus	other
0.468	0.0418	Cmbl		CMBL	carboxymethylenebutenolidase homolog (Pseudomonas)	unknown	enzyme
0.468	0.0458	Echdc2		ECHDC2	enoyl CoA hydratase domain containing 2	unknown	other
0.467	0.0287	Timm9		TIMM9	translocase of inner mitochondrial membrane 9 homolog (yeast)	Cytoplasm	transporter
0.466	0.0163	Pdss1		PDSS1	prenyl (decaprenyl) diphosphate synthase, subunit 1	Cytoplasm	enzyme
0.464	0.00573	Trdn	D	TRDN	triadin	Cytoplasm	other
0.464	0.0274	Neu1		NEU1	sialidase 1 (lysosomal sialidase)	Cytoplasm	enzyme
0.463	0.0069	Tmem229a		TMEM229A	transmembrane protein 229A	unknown	other
0.462	0.00682	Cyb5		CYB5A	cytochrome b5 type A (microsomal)	Cytoplasm	enzyme
0.462	0.0178	Arhgef19		ARHGEF19	Rho guanine nucleotide exchange factor (GEF) 19	unknown	other
0.462	0.0919	Arl6ip1		ARL6IP1 (includes EG:23204)	ADP-ribosylation factor-like 6 interacting protein 1	Cytoplasm	other
0.461	0.0758	Ugt3a1	D	UGT3A2	UDP glycosyltransferase 3 family, polypeptide A2	unknown	other
0.46	0.004	Pepd		PEPD	peptidase D	Cytoplasm	peptidase
0.46	0.0147	Aoah		AOAH	acyloxyacyl hydrolase (neutrophil)	Extracellular Space	enzyme
0.46	0.0475	Reep5		REEP5	receptor accessory protein 5	Extracellular Space	transporter
0.458	0.0231	Unkl		Unkl	unkempt-like (Drosophila)	unknown	other
0.457	0.0216	Ccdc21		CEP85	centrosomal protein 85kDa	Nucleus	other
0.457	0.0427	Ift122		IFT122	intraflagellar transport 122 homolog (Chlamydomonas)	Nucleus	other
0.456	0.004	Akr7a5		AKR7A2	aldo-keto reductase family 7, member A2 (aflatoxin aldehyde reductase)	Cytoplasm	enzyme
0.456	0.0598	E030010A14Rik		C9orf71	chromosome 9 open reading frame 71	unknown	other
0.455	0.0361	Sepx1		MSRB1	methionine sulfoxide reductase B1	unknown	enzyme
0.454	0.0289	D730039F16Rik		D730039F16Rik	RIKEN cDNA D730039F16 gene	unknown	other
0.453	0.0331	Slc22a12		SLC22A12	solute carrier family 22 (organic anion/urate transporter), member 12	Plasma Membrane	transporter	colchicine/probenecid, probenecid
0.453	0.0621	Bid		BID	BH3 interacting domain death agonist	Cytoplasm	other
0.453	0.0654	Plekhf1		PLEKHF1	pleckstrin homology domain containing, family F (with FYVE domain) member 1	Cytoplasm	other
0.452	0.0798	Cdcp1		CDCP1	CUB domain containing protein 1	Plasma Membrane	other
0.452	0.0822	Rnft1		RNFT1	ring finger protein, transmembrane 1	unknown	other
0.451	0.0318	Rassf3		RASSF3	Ras association (RalGDS/AF-6) domain family member 3	unknown	other
0.451	0.0638	Olfr787		Olfr787	olfactory receptor 787	Plasma Membrane	G-protein coupled receptor
0.45	0.012	Sypl2		SYPL2	synaptophysin-like 2	unknown	other
0.45	0.041	Ccdc122		CCDC122	coiled-coil domain containing 122	unknown	other
0.449	0.0119	3110047P20Rik		KIAA1239	KIAA1239	unknown	other
0.449	0.0215	D14Abb1e		FAM208A	family with sequence similarity 208, member A	unknown	other
0.449	0.0294	Man1a		MAN1A1	mannosidase, alpha, class 1A, member 1	Cytoplasm	enzyme
0.447	0.0613	Tmem8		TMEM8A	transmembrane protein 8A	Plasma Membrane	other
0.446	0.0405	Ddx52		DDX52	DEAD (Asp-Glu-Ala-Asp) box polypeptide 52	Nucleus	enzyme
0.446	0.0594	Ropn1l		ROPN1L	rhophilin associated tail protein 1-like	Cytoplasm	kinase
0.444	0.044	Hscb		HSCB	HscB iron-sulfur cluster co-chaperone homolog (E, coli)	Cytoplasm	other
0.443	0.0191	AI464131		KIAA1161	KIAA1161	Nucleus	other
0.443	0.0885	Skiv2l2		SKIV2L2	superkiller viralicidic activity 2-like 2 (S, cerevisiae)	Nucleus	other
0.442	0.0287	Adh5		ADH5 (includes EG:100145871)	alcohol dehydrogenase 5 (class III), chi polypeptide	Cytoplasm	enzyme
0.442	0.0753	Asl		ASL	argininosuccinate lyase	Cytoplasm	enzyme
0.441	0.0511	Slc25a48		SLC25A48	solute carrier family 25, member 48	Cytoplasm	other
0.44	0.0106	ENSMUST00000099185
0.44	0.0384	Proz		PROZ	protein Z, vitamin K-dependent plasma glycoprotein	Extracellular Space	peptidase
0.44	0.0757	Clpx		CLPX	ClpX caseinolytic peptidase X homolog (E, coli)	Cytoplasm	enzyme
0.438	0.0306	Ovol1		OVOL1	ovo-like 1(Drosophila)	Nucleus	transcription regulator
0.438	0.0456	Pyroxd2		PYROXD2	pyridine nucleotide-disulphide oxidoreductase domain 2	unknown	other
0.437	0.0396	E030030I06Rik		E030030I06Rik	RIKEN cDNA E030030I06 gene	unknown	kinase
0.437	0.0694	Slc6a20b		Slc6a20b	solute carrier family 6 (neurotransmitter transporter), member 20B	Plasma Membrane	transporter
0.437	0.0874	Lap3		LAP3	leucine aminopeptidase 3	Cytoplasm	peptidase
0.435	0.00665	Mettl1		METTL1	methyltransferase like 1	Nucleus	enzyme
0.435	0.0617	Frrs1		FRRS1	ferric-chelate reductase 1	Plasma Membrane	transmembrane receptor
0.433	0.0469	Galnt14		GALNT14	UDP-N-acetyl-alpha-D-galactosamine:polypeptide N-acetylgalactosaminyltransferase 14 (GalNAc-T14)	Cytoplasm	enzyme
0.432	0.0232	Id2		ID2	inhibitor of DNA binding 2, dominant negative helix-loop-helix protein	Nucleus	transcription regulator
0.432	0.0306	Arsg		ARSG	arylsulfatase G	Cytoplasm	enzyme
0.431	0.0375	Slc26a1		SLC26A1	solute carrier family 26 (sulfate transporter), member 1	Plasma Membrane	transporter
0.431	0.0469	Rdh5		RDH5	retinol dehydrogenase 5 (11-cis/9-cis)	Cytoplasm	enzyme
0.43	0.0605	Smpdl3a		SMPDL3A	sphingomyelin phosphodiesterase, acid-like 3A	Extracellular Space	enzyme
0.43	0.0709	Ube1y1		Ube1y1 (rat)	ubiquitin-activating enzyme E1, Chr Y 1	unknown	enzyme
0.43	0.0733	Hunk		HUNK	hormonally up-regulated Neu-associated kinase	Cytoplasm	kinase
0.429	0.087	Gk5		GK5	glycerol kinase 5 (putative)	unknown	kinase
0.429	0.0882	Zfp868		Zfp868	zinc finger protein 868	unknown	other
0.427	0.0827	Ndufaf1		NDUFAF1	NADH dehydrogenase (ubiquinone) complex I, assembly factor 1	Cytoplasm	other
0.425	0.0753	9430007A20Rik		9430007A20Rik	RIKEN cDNA 9430007A20 gene	unknown	other
0.425	0.0774	Suox		SUOX	sulfite oxidase	Cytoplasm	enzyme
0.424	0.00601	Tpmt		TPMT	thiopurine S-methyltransferase	Cytoplasm	enzyme
0.424	0.0674	Kctd2		KCTD2	potassium channel tetramerisation domain containing 2	unknown	ion channel
0.424	0.0754	Fn3k		FN3K	fructosamine 3 kinase	Cytoplasm	kinase
0.424	0.0822	Zfp167		ZNF167	zinc finger protein 167	Nucleus	transcription regulator
0.424	0.0833	Naaladl2		NAALADL2	N-acetylated alpha-linked acidic dipeptidase-like 2	unknown	other
0.421	0.0308	2310030G06Rik		C11orf52	chromosome 11 open reading frame 52	unknown	other
0.421	0.0507	Pacrg		PACRG	PARK2 co-regulated	Cytoplasm	other
0.42	0.0878	Adam11		ADAM11	ADAM metallopeptidase domain 11	Plasma Membrane	peptidase
0.419	0.0194	AI314976		C6orf130	chromosome 6 open reading frame 130	unknown	enzyme
0.419	0.0638	Herc3		HERC3	HECT and RLD domain containing E3 ubiquitin protein ligase 3	Cytoplasm	enzyme
0.418	0.0754	Sat2		SAT2	spermidine/spermine N1-acetyltransferase family member 2	Plasma Membrane	enzyme
0.417	0.0135	Rbm38		RBM38	RNA binding motif protein 38	Cytoplasm	other
0.417	0.0145	Cib1		CIB1	calcium and integrin binding 1 (calmyrin)	Nucleus	other
0.416	0.014	Prim2		PRIM2	primase, DNA, polypeptide 2 (58kDa)	Nucleus	enzyme	fludarabine phosphate
0.416	0.0146	Abhd14a		ABHD14A	abhydrolase domain containing 14A	Cytoplasm	enzyme
0.416	0.0277	Sepp1		SEPP1	selenoprotein P, plasma, 1	Extracellular Space	other
0.415	0.0211	Tm7sf3		TM7SF3	transmembrane 7 superfamily member 3	Plasma Membrane	other
0.415	0.0347	Scrn3		SCRN3	secernin 3	unknown	other
0.415	0.0806	Galnt3		GALNT3	UDP-N-acetyl-alpha-D-galactosamine:polypeptide N-acetylgalactosaminyltransferase 3 (GalNAc-T3)	Cytoplasm	enzyme
0.414	0.0127	Zfp101		Zfp101	zinc finger protein 101	Nucleus	other
0.414	0.0208	Cd302		CD302	CD302 molecule	Plasma Membrane	transmembrane receptor
0.414	0.053	Ndufa1		NDUFA1	NADH dehydrogenase (ubiquinone) 1 alpha subcomplex, 1, 7,5kDa	Cytoplasm	enzyme
0.413	0.068	Slc25a13		SLC25A13	solute carrier family 25 (aspartate/glutamate carrier), member 13	Cytoplasm	transporter
0.413	0.0794	Ptpn9		PTPN9	protein tyrosine phosphatase, non-receptor type 9	Cytoplasm	phosphatase
0.413	0.0923	Nipsnap1		NIPSNAP1	nipsnap homolog 1 (C, elegans)	Cytoplasm	enzyme
0.411	0.0445	Slc22a18		SLC22A18	solute carrier family 22, member 18	Plasma Membrane	transporter
0.411	0.0506	Smpd2		SMPD2	sphingomyelin phosphodiesterase 2, neutral membrane (neutral sphingomyelinase)	Cytoplasm	enzyme
0.411	0.0512	Tfb2m	D	TFB2M	transcription factor B2, mitochondrial	Cytoplasm	enzyme
0.41	0.0528	Dpp7		DPP7	dipeptidyl-peptidase 7	Cytoplasm	peptidase
0.41	0.053	Lrrc40		LRRC40	leucine rich repeat containing 40	Nucleus	other
0.41	0.0633	Setd6		SETD6	SET domain containing 6	Nucleus	enzyme
0.409	0.00954	Peci
0.409	0.0682	Rbm11		RBM11	RNA binding motif protein 11	unknown	other
0.409	0.0937	Sod1		SOD1	superoxide dismutase 1, soluble	Cytoplasm	enzyme
0.408	0.0119	Myl6b		MYL6B	myosin, light chain 6B, alkali, smooth muscle and non-muscle	Cytoplasm	other
0.408	0.0225	Lmo4		LMO4	LIM domain only 4	Nucleus	transcription regulator
0.408	0.0323	Lcmt2		LCMT2	leucine carboxyl methyltransferase 2	unknown	enzyme
0.408	0.0761	9130023H24Rik		9130023H24Rik	RIKEN cDNA 9130023H24 gene	unknown	other
0.407	0.00943	Nit1		NIT1 (includes EG:27045)	nitrilase 1	Cytoplasm	enzyme
0.407	0.0271	Shmt2		SHMT2	serine hydroxymethyltransferase 2 (mitochondrial)	Cytoplasm	enzyme
0.407	0.045	Hist1h2bm		HIST1H2BD	histone cluster 1, H2bd	Nucleus	other
0.407	0.0455	Abhd14b		ABHD14B	abhydrolase domain containing 14B	Cytoplasm	enzyme
0.407	0.0829	Pde4c		PDE4C	phosphodiesterase 4C, cAMP-specific	Cytoplasm	enzyme	dyphylline, nitroglycerin, arofylline, tetomilast, L 869298, aminophylline, anagrelide, cilomilast, milrinone, rolipram, dipyridamole, L-826,141, roflumilast, tolbutamide, theophylline, pentoxifylline, caffeine
0.406	0.0136	Hist1h4c		Hist2h4 (includes others)	histone cluster 2, H4	Nucleus	other
0.405	0.0814	Gatsl3		GATSL3	GATS protein-like 3	unknown	other
0.403	0.0167	Pmpcb		PMPCB	peptidase (mitochondrial processing) beta	Cytoplasm	peptidase
0.403	0.0232	Pole4		POLE4	polymerase (DNA-directed), epsilon 4, accessory subunit	Nucleus	enzyme	gemcitabine
0.403	0.048	Tfb2m	D	TFB2M	transcription factor B2, mitochondrial	Cytoplasm	enzyme
0.401	0.0412	Mcat		MCAT	malonyl CoA:ACP acyltransferase (mitochondrial)	Cytoplasm	enzyme
0.4	0.0937	Bphl		BPHL	biphenyl hydrolase-like (serine hydrolase)	Cytoplasm	enzyme
0.399	0.0336	Aqp11		AQP11	aquaporin 11	Plasma Membrane	transporter
0.399	0.0361	Inpp5b		INPP5B	inositol polyphosphate-5-phosphatase, 75kDa	Plasma Membrane	phosphatase
0.399	0.0834	Eefsec		Eefsec	eukaryotic elongation factor, selenocysteine-tRNA-specific	unknown	other
0.399	0.1	Mfsd1		MFSD1	major facilitator superfamily domain containing 1	unknown	transporter
0.398	0.0419	Irx3		IRX3	iroquois homeobox 3	Nucleus	transcription regulator
0.397	0.0563	Edem1		EDEM1	ER degradation enhancer, mannosidase alpha-like 1	Cytoplasm	enzyme
0.395	0.0309	Cblc		CBLC	Cbl proto-oncogene, E3 ubiquitin protein ligase C	Nucleus	enzyme
0.395	0.0885	Cldn18		CLDN18	claudin 18	Plasma Membrane	other
0.394	0.0215	Fbxo8		FBXO8	F-box protein 8	Cytoplasm	other
0.394	0.073	Olfr857		Olfr58 (includes others)	olfactory receptor 859	Plasma Membrane	G-protein coupled receptor
0.393	0.0194	Nfs1		NFS1	NFS1 nitrogen fixation 1 homolog (S, cerevisiae)	Cytoplasm	enzyme
0.393	0.0363	Stard3nl		STARD3NL	STARD3 N-terminal like	Cytoplasm	other
0.391	0.0147	Ascc1		ASCC1	activating signal cointegrator 1 complex subunit 1	Nucleus	transcription regulator
0.391	0.0198	Fcgrt		FCGRT	Fc fragment of IgG, receptor, transporter, alpha	Plasma Membrane	transmembrane receptor
0.391	0.0631	Vti1a		VTI1A	vesicle transport through interaction with t-SNAREs homolog 1A (yeast)	Plasma Membrane	transporter
0.391	0.0714	Map1lc3a		MAP1LC3A	microtubule-associated protein 1 light chain 3 alpha	Cytoplasm	other
0.39	0.0469	Apool		APOOL	apolipoprotein O-like	Extracellular Space	other
0.39	0.0634	Tmem25		TMEM25	transmembrane protein 25	Extracellular Space	other
0.388	0.0287	1300018J18Rik		SELO	selenoprotein O	Extracellular Space	enzyme
0.388	0.0302	Gtf3a		GTF3A	general transcription factor IIIA	Nucleus	transcription regulator
0.388	0.058	Kat2b		KAT2B	K(lysine) acetyltransferase 2B	Nucleus	transcription regulator
0.387	0.0254	Arhgap10		ARHGAP10	Rho GTPase activating protein 10	Cytoplasm	other
0.387	0.0925	Bivm		BIVM	basic, immunoglobulin-like variable motif containing	Extracellular Space	other
0.386	0.0174	Bnc2		BNC2	basonuclin 2	Nucleus	other
0.386	0.0438	Prkcz		PRKCZ	protein kinase C, zeta	Cytoplasm	kinase	ingenol 3-angelate
0.385	0.0256	Mtbp		MTBP	Mdm2, transformed 3T3 cell double minute 2, p53 binding protein (mouse) binding protein, 104kDa	unknown	other
0.384	0.0625	Stbd1		STBD1	starch binding domain 1	Cytoplasm	other
0.383	0.0461	Trim7		TRIM7	tripartite motif containing 7	Cytoplasm	other
0.382	0.0236	Fam149a		FAM149A	family with sequence similarity 149, member A	unknown	other
0.382	0.061	Ccdc132		CCDC132	coiled-coil domain containing 132	unknown	other
0.382	0.0658	Fpgt		FPGT	fucose-1-phosphate guanylyltransferase	Cytoplasm	enzyme
0.381	0.026	Fech		FECH	ferrochelatase	Cytoplasm	enzyme
0.38	0.046	Rars2		RARS2	arginyl-tRNA synthetase 2, mitochondrial	Cytoplasm	enzyme
0.379	0.0277	Ankrd33b	D	ANKRD33B	ankyrin repeat domain 33B	unknown	other
0.379	0.037	0610009D07Rik		SF3B14	splicing factor 3B, 14 kDa subunit	Nucleus	other
0.379	0.0489	Sord	D	SORD	sorbitol dehydrogenase	Cytoplasm	enzyme
0.379	0.0876	Abcb6		ABCB6	ATP-binding cassette, sub-family B (MDR/TAP), member 6	Cytoplasm	transporter
0.378	0.032	Mgat3		MGAT3	mannosyl (beta-1,4-)-glycoprotein beta-1,4-N-acetylglucosaminyltransferase	Cytoplasm	enzyme
0.378	0.0444	1810063B05Rik		C1orf31	chromosome 1 open reading frame 31	Cytoplasm	other
0.378	0.0649	Elmod3		ELMOD3	ELMO/CED-12 domain containing 3	unknown	other
0.377	0.0225	Nr2f6		NR2F6	nuclear receptor subfamily 2, group F, member 6	Nucleus	ligand-dependent nuclear receptor
0.377	0.032	Crbn		CRBN	cereblon	Cytoplasm	enzyme
0.377	0.0336	B3galt5		B3GALT5	UDP-Gal:betaGlcNAc beta 1,3-galactosyltransferase, polypeptide 5	Cytoplasm	enzyme
0.376	0.0308	Bend7		BEND7	BEN domain containing 7	unknown	other
0.375	0.0198	Plk1s1		PLK1S1	polo-like kinase 1 substrate 1	Cytoplasm	other
0.375	0.0608	C1galt1		C1GALT1	core 1 synthase, glycoprotein-N-acetylgalactosamine 3-beta-galactosyltransferase, 1	Plasma Membrane	enzyme
0.375	0.0629	Ugt3a1	D	UGT3A2	UDP glycosyltransferase 3 family, polypeptide A2	unknown	other
0.375	0.0754	ENSMUST00000119515
0.375	0.0925	Immp2l		IMMP2L	IMP2 inner mitochondrial membrane peptidase-like (S, cerevisiae)	Cytoplasm	peptidase
0.374	0.0171	Sdhaf1	D	SDHAF1	succinate dehydrogenase complex assembly factor 1	Cytoplasm	other
0.374	0.0333	Mobkl2b
0.374	0.0585	Tulp3		TULP3	tubby like protein 3	Extracellular Space	other
0.373	0.0408	Tmem126b		TMEM126B	transmembrane protein 126B	unknown	other
0.373	0.0545	Sord	D	SORD	sorbitol dehydrogenase	Cytoplasm	enzyme
0.372	0.0253	Phf7		PHF7	PHD finger protein 7	Nucleus	other
0.372	0.0362	Ttc38		TTC38	tetratricopeptide repeat domain 38	unknown	other
0.372	0.0492	Mrps31		MRPS31	mitochondrial ribosomal protein S31	Cytoplasm	other
0.372	0.0942	Ccdc91		CCDC91	coiled-coil domain containing 91	unknown	other
0.371	0.0827	Gfm1		GFM1	G elongation factor, mitochondrial 1	Cytoplasm	translation regulator
0.37	0.0175	Zfp706		Zfp706	zinc finger protein 706	unknown	other
0.369	0.0225	Yaf2		YAF2	YY1 associated factor 2	Nucleus	transcription regulator
0.369	0.0312	Gm13476		Gm13476	predicted gene 13476	unknown	other
0.369	0.032	Rfesd		RFESD	Rieske (Fe-S) domain containing	unknown	other
0.369	0.0331	Fnip2		FNIP2	folliculin interacting protein 2	Cytoplasm	other
0.368	0.05	Uqcr10		UQCR10	ubiquinol-cytochrome c reductase, complex III subunit X	Cytoplasm	enzyme
0.368	0.0674	Mbd4		MBD4	methyl-CpG binding domain protein 4	Nucleus	enzyme
0.368	0.0855	Mfap3l		MFAP3L	microfibrillar-associated protein 3-like	unknown	other
0.368	0.0967	Tmem223		TMEM223	transmembrane protein 223	Cytoplasm	other
0.367	0.014	Tk1		TK1	thymidine kinase 1, soluble	Cytoplasm	kinase
0.367	0.0917	Acad8		ACAD8	acyl-CoA dehydrogenase family, member 8	Cytoplasm	enzyme
0.366	0.0165	Fbxl4		FBXL4	F-box and leucine-rich repeat protein 4	Nucleus	other
0.365	0.0238	Slc25a34		SLC25A34	solute carrier family 25, member 34	Cytoplasm	other
0.365	0.0541	Daf2		Cd55/Daf2	CD55 antigen	Plasma Membrane	other
0.365	0.0949	Ublcp1	D	UBLCP1	ubiquitin-like domain containing CTD phosphatase 1	Nucleus	phosphatase
0.364	0.0276	Psma5		PSMA5	proteasome (prosome, macropain) subunit, alpha type, 5	Cytoplasm	peptidase
0.364	0.0306	Tsga10ip		TSGA10IP	testis specific, 10 interacting protein	unknown	other
0.364	0.0418	Arhgap42	D	ARHGAP42	Rho GTPase activating protein 42	unknown	other
0.364	0.0776	Dnajc13		DNAJC13	DnaJ (Hsp40) homolog, subfamily C, member 13	Cytoplasm	other
0.363	0.0594	Xpa		XPA	xeroderma pigmentosum, complementation group A	Nucleus	other
0.362	0.0241	Brp44l		BRP44L	brain protein 44-like	Cytoplasm	other
0.362	0.0251	Pgm2		PGM2	phosphoglucomutase 2	Cytoplasm	enzyme
0.362	0.0804	Gm4952		Gm4952	predicted gene 4952	Cytoplasm	other
0.361	0.0396	Mrpl16		MRPL16 (includes EG:293754)	mitochondrial ribosomal protein L16	Cytoplasm	other
0.36	0.0437	Cenpv		CENPV	centromere protein V	Nucleus	other
0.36	0.0454	Phyh		PHYH	phytanoyl-CoA 2-hydroxylase	Cytoplasm	enzyme
0.36	0.053	Fastkd2		FASTKD2	FAST kinase domains 2	Cytoplasm	other
0.36	0.0984	ENSMUST00000099185
0.359	0.0143	Psmc6		PSMC6	proteasome (prosome, macropain) 26S subunit, ATPase, 6	Nucleus	peptidase
0.359	0.0475	Etaa1		ETAA1	Ewing tumor-associated antigen 1	unknown	other
0.359	0.0477	Pcgf5		PCGF5	polycomb group ring finger 5	Cytoplasm	other
0.359	0.0834	Ywhaz		YWHAZ	tyrosine 3-monooxygenase/tryptophan 5-monooxygenase activation protein, zeta polypeptide	Cytoplasm	enzyme
0.358	0.0407	Bloc1s1	D	BLOC1S1	biogenesis of lysosomal organelles complex-1, subunit 1	Cytoplasm	other
0.357	0.0357	Acad10		Acad10	acyl-CoA dehydrogenase family, member 10	Cytoplasm	other
0.357	0.0375	Gpn2		GPN2	GPN-loop GTPase 2	unknown	other
0.357	0.0432	Gnpat		GNPAT	glyceronephosphate O-acyltransferase	Cytoplasm	enzyme
0.356	0.0407	Trnau1ap		TRNAU1AP	tRNA selenocysteine 1 associated protein 1	Nucleus	other
0.356	0.0477	Pdzk1		PDZK1	PDZ domain containing 1	Plasma Membrane	transporter
0.356	0.079	Sdhaf1	D	SDHAF1	succinate dehydrogenase complex assembly factor 1	Cytoplasm	other
0.355	0.038	Pbld		PBLD	phenazine biosynthesis-like protein domain containing	unknown	enzyme
0.355	0.0638	ENSMUST00000087411
0.355	0.0776	Mtch2		MTCH2	mitochondrial carrier 2	Cytoplasm	other
0.355	0.0882	Acp1		ACP1 (includes EG:11431)	acid phosphatase 1, soluble	Cytoplasm	phosphatase
0.354	0.0464	Lars2		LARS2	leucyl-tRNA synthetase 2, mitochondrial	Cytoplasm	enzyme
0.354	0.0709	Htra1		HTRA1	HtrA serine peptidase 1	Extracellular Space	peptidase
0.354	0.0955	Tmem169		TMEM169	transmembrane protein 169	unknown	other
0.353	0.0344	Kcng1		KCNG1 (includes EG:241794)	potassium voltage-gated channel, subfamily G, member 1	Plasma Membrane	ion channel
0.353	0.0444	Nme2		NME2	NME/NM23 nucleoside diphosphate kinase 2	Nucleus	kinase
0.353	0.0449	Ubr1		UBR1 (includes EG:197131)	ubiquitin protein ligase E3 component n-recognin 1	Cytoplasm	enzyme
0.352	0.0161	Mtfr1		MTFR1	mitochondrial fission regulator 1	Cytoplasm	other
0.351	0.0644	Chac2		CHAC2	ChaC, cation transport regulator homolog 2 (E, coli)	unknown	other
0.351	0.0829	Ces2f		Ces2f	carboxylesterase 2F	unknown	enzyme
0.35	0.053	LOC100043371
0.35	0.0709	Dhrs4		DHRS4	dehydrogenase/reductase (SDR family) member 4	Cytoplasm	enzyme
0.349	0.0479	Ssx2ip		SSX2IP	synovial sarcoma, X breakpoint 2 interacting protein	Plasma Membrane	other
0.349	0.0615	Lrrc19		LRRC19	leucine rich repeat containing 19	unknown	other
0.348	0.0275	Tor1a		TOR1A	torsin family 1, member A (torsin A)	Cytoplasm	peptidase
0.347	0.0334	Rufy3		RUFY3	RUN and FYVE domain containing 3	Plasma Membrane	other
0.347	0.0396	Mto1		MTO1	mitochondrial translation optimization 1 homolog (S, cerevisiae)	Cytoplasm	enzyme
0.347	0.0399	Pex11a		PEX11A	peroxisomal biogenesis factor 11 alpha	Cytoplasm	other
0.347	0.0682	A730020M07Rik		A730020M07Rik	RIKEN cDNA A730020M07 gene	unknown	other
0.347	0.0947	Asb7		ASB7	ankyrin repeat and SOCS box containing 7	unknown	other
0.346	0.0321	Ggt1		GGT1	gamma-glutamyltransferase 1	Cytoplasm	enzyme
0.346	0.0617	Chchd2	D	CHCHD2	coiled-coil-helix-coiled-coil-helix domain containing 2	Cytoplasm	other
0.346	0.0627	Hps3		HPS3	Hermansky-Pudlak syndrome 3	Cytoplasm	other
0.346	0.0869	Ak2		AK2	adenylate kinase 2	Cytoplasm	kinase
0.345	0.0655	Lpar3		LPAR3	lysophosphatidic acid receptor 3	Plasma Membrane	G-protein coupled receptor
0.344	0.0336	Klraq1		PPP1R21	protein phosphatase 1, regulatory subunit 21	unknown	other
0.344	0.0357	GENSCAN00000047389
0.344	0.065	Tfam		TFAM	transcription factor A, mitochondrial	Cytoplasm	transcription regulator
0.344	0.0938	ENSMUST00000101846
0.344	0.0999	Rad51c		RAD51C	RAD51 homolog C (S, cerevisiae)	Nucleus	enzyme
0.343	0.0425	Kdsr		KDSR	3-ketodihydrosphingosine reductase	Plasma Membrane	enzyme
0.342	0.0518	ENSMUST00000102181
0.342	0.055	Ubxn2b		UBXN2B	UBX domain protein 2B	unknown	other
0.341	0.0219	Eif4b		EIF4B	eukaryotic translation initiation factor 4B	Cytoplasm	translation regulator
0.34	0.0342	Slc30a1		SLC30A1	solute carrier family 30 (zinc transporter), member 1	Plasma Membrane	transporter
0.34	0.0605	Cenpq		CENPQ	centromere protein Q	unknown	other
0.34	0.0906	Mllt11		MLLT11	myeloid/lymphoid or mixed-lineage leukemia (trithorax homolog, Drosophila); translocated to, 11	Cytoplasm	other
0.34	0.0989	Slc33a1		SLC33A1	solute carrier family 33 (acetyl-CoA transporter), member 1	Cytoplasm	transporter
0.339	0.0506	Bach2		Bach2	BTB and CNC homology 1, basic leucine zipper transcription factor 2	unknown	other
0.339	0.071	Usp20		USP20	ubiquitin specific peptidase 20	Cytoplasm	peptidase
0.338	0.0372	4930452B06Rik		C3orf67	chromosome 3 open reading frame 67	unknown	other
0.338	0.0427	Bloc1s1	D	BLOC1S1	biogenesis of lysosomal organelles complex-1, subunit 1	Cytoplasm	other
0.338	0.0525	Tbx10		TBX10	T-box 10	Nucleus	transcription regulator
0.338	0.0553	Npepl1		NPEPL1	aminopeptidase-like 1	unknown	peptidase
0.338	0.0882	ENSMUST00000102008
0.338	0.0882	ENSMUST00000102008
0.338	0.0882	ENSMUST00000102008
0.336	0.0296	1810035L17Rik		SLIRP	SRA stem-loop interacting RNA binding protein	Cytoplasm	other
0.336	0.0408	B3galnt2		B3GALNT2	beta-1,3-N-acetylgalactosaminyltransferase 2	unknown	enzyme
0.336	0.0444	Ddt		DDT	D-dopachrome tautomerase	Cytoplasm	enzyme
0.336	0.0938	Aamp		AAMP	angio-associated, migratory cell protein	Plasma Membrane	other
0.335	0.0418	Fggy		FGGY	FGGY carbohydrate kinase domain containing	unknown	other
0.335	0.0469	Tmem28		FAM155B	family with sequence similarity 155, member B	Plasma Membrane	transmembrane receptor
0.335	0.0833	ENSMUST00000122963		4933427G23Rik	RIKEN cDNA 4933427G23 gene	unknown	other
0.335	0.0926	Ugt3a1	D	UGT3A2	UDP glycosyltransferase 3 family, polypeptide A2	unknown	other
0.335	0.0928	Cutc		CUTC	cutC copper transporter homolog (E, coli)	Cytoplasm	other
0.335	0.0955	Insl6		INSL6	insulin-like 6	Extracellular Space	other
0.334	0.071	Cgrrf1		CGRRF1	cell growth regulator with ring finger domain 1	unknown	other
0.334	0.0822	Wdr45		WDR45	WD repeat domain 45	unknown	other
0.334	0.0989	Trdn	D	TRDN	triadin	Cytoplasm	other
0.333	0.0942	Hlf		Hlf	hepatic leukemia factor	unknown	other
0.332	0.0236	Rpain		RPAIN	RPA interacting protein	Nucleus	other
0.332	0.0274	Tmem205		TMEM205	transmembrane protein 205	unknown	other
0.332	0.0362	Slc36a1		SLC36A1	solute carrier family 36 (proton/amino acid symporter), member 1	Plasma Membrane	transporter
0.332	0.0375	Cideb		CIDEB	cell death-inducing DFFA-like effector b	Cytoplasm	other
0.332	0.0417	Fam136a		Fam136a	family with sequence similarity 136, member A	Cytoplasm	other
0.332	0.0475	B4galnt3		B4GALNT3	beta-1,4-N-acetyl-galactosaminyl transferase 3	unknown	enzyme
0.332	0.0568	Arpp19		Arpp19	cAMP-regulated phosphoprotein 19	unknown	other
0.332	0.0629	BC025446		BC025446	cDNA sequence BC025446	Plasma Membrane	other
0.332	0.0709	Gnpda2		GNPDA2	glucosamine-6-phosphate deaminase 2	unknown	enzyme
0.331	0.0318	GENSCAN00000003065
0.331	0.0657	Helb		HELB	helicase (DNA) B	Nucleus	enzyme	epirubicin
0.33	0.0542	Cda		CDA	cytidine deaminase	Nucleus	enzyme
0.329	0.0312	Mlx		MLX	MAX-like protein X	Nucleus	transcription regulator
0.329	0.0316	2310061J03Rik		2310061J03Rik	RIKEN cDNA 2310061J03 gene	unknown	other
0.329	0.0374	4930420K17Rik		C7orf23	chromosome 7 open reading frame 23	unknown	other
0.329	0.0955	Myh14		MYH14	myosin, heavy chain 14, non-muscle	Extracellular Space	other
0.329	0.0977	Ak4		AK4	adenylate kinase 4	Cytoplasm	kinase
0.328	0.0202	Phyhd1		PHYHD1	phytanoyl-CoA dioxygenase domain containing 1	unknown	other
0.328	0.0297	F8a		F8a	factor 8-associated gene A	Plasma Membrane	other
0.328	0.0412	Gm10742		Gm10742	predicted gene 10742	unknown	other
0.328	0.0709	Ano4		ANO4	anoctamin 4	unknown	other
0.327	0.0621	Ppm1d		PPM1D	protein phosphatase, Mg2+/Mn2+ dependent, 1D	Cytoplasm	phosphatase
0.327	0.0866	Timm8a1		TIMM8A	translocase of inner mitochondrial membrane 8 homolog A (yeast)	Cytoplasm	transporter
0.327	0.0953	1810019J16Rik		C1orf172	chromosome 1 open reading frame 172	unknown	other
0.327	0.0989	2310016M24Rik		COX14 (includes EG:100428926)	COX14 cytochrome c oxidase assembly homolog (S, cerevisiae)	Cytoplasm	other
0.326	0.0445	Hpn		HPN	hepsin	Plasma Membrane	peptidase
0.326	0.053	Gchfr		GCHFR	GTP cyclohydrolase I feedback regulator	Cytoplasm	other
0.326	0.053	Nucb2		NUCB2	nucleobindin 2	Nucleus	other
0.325	0.0232	Slc9a3r1		SLC9A3R1	solute carrier family 9, subfamily A (NHE3, cation proton antiporter 3), member 3 regulator 1	Plasma Membrane	other
0.325	0.0373	Pnpo		PNPO	pyridoxamine 5'-phosphate oxidase	Cytoplasm	enzyme
0.325	0.0582	Tmem174		TMEM174	transmembrane protein 174	unknown	other
0.324	0.0349	GENSCAN00000035100
0.324	0.062	Zfp655		ZNF655	zinc finger protein 655	Nucleus	other
0.323	0.0663	Gpr172b
0.323	0.0958	Psmb6		PSMB6	proteasome (prosome, macropain) subunit, beta type, 6	Cytoplasm	peptidase
0.322	0.0305	Tbc1d13		TBC1D13	TBC1 domain family, member 13	unknown	other
0.322	0.0456	Timm50		TIMM50	translocase of inner mitochondrial membrane 50 homolog (S, cerevisiae)	Cytoplasm	phosphatase
0.322	0.0829	C1ql3		C1QL3	complement component 1, q subcomponent-like 3	Extracellular Space	other
0.322	0.0867	C1galt1c1		C1GALT1C1	C1GALT1-specific chaperone 1	Cytoplasm	enzyme
0.321	0.046	Osgepl1		OSGEPL1	O-sialoglycoprotein endopeptidase-like 1	Cytoplasm	peptidase
0.32	0.0518	Ybx1	D	YBX1	Y box binding protein 1	Nucleus	transcription regulator
0.32	0.0538	Ltn1	D	LTN1	listerin E3 ubiquitin protein ligase 1	Nucleus	enzyme
0.32	0.077	Gpr155		GPR155	G protein-coupled receptor 155	Plasma Membrane	G-protein coupled receptor
0.32	0.0788	1810046J19Rik		MIEN1	migration and invasion enhancer 1	Cytoplasm	other
0.32	0.0885	Nipsnap3b		NIPSNAP3B	nipsnap homolog 3B (C, elegans)	Cytoplasm	other
0.32	0.097	Naglu		NAGLU	N-acetylglucosaminidase, alpha	Cytoplasm	enzyme
0.32	0.0993	Dhx29		DHX29	DEAH (Asp-Glu-Ala-His) box polypeptide 29	Cytoplasm	enzyme
0.319	0.0167	ENSMUST00000050898
0.319	0.0253	Trappc9		TRAPPC9	trafficking protein particle complex 9	Plasma Membrane	other
0.319	0.0278	Mrpl36		MRPL36 (includes EG:100430880)	mitochondrial ribosomal protein L36	Cytoplasm	other
0.319	0.0282	Efha1		EFHA1	EF-hand domain family, member A1	Cytoplasm	other
0.319	0.0284	Gyk		GK	glycerol kinase	Cytoplasm	kinase
0.319	0.0386	Ttc7b		Ttc7b	tetratricopeptide repeat domain 7B	unknown	other
0.319	0.0455	Sap30l		SAP30L	SAP30-like	unknown	other
0.319	0.0645	E2f5		E2F5	E2F transcription factor 5, p130-binding	Nucleus	transcription regulator
0.319	0.0864	Pebp1		PEBP1	phosphatidylethanolamine binding protein 1	Cytoplasm	other
0.318	0.0215	Dom3z		DOM3Z	dom-3 homolog Z (C, elegans)	unknown	other
0.318	0.024	Psmg2		PSMG2	proteasome (prosome, macropain) assembly chaperone 2	Nucleus	other
0.318	0.033	Rab11fip3		RAB11FIP3	RAB11 family interacting protein 3 (class II)	Cytoplasm	other
0.318	0.0408	Mtif3		MTIF3	mitochondrial translational initiation factor 3	Cytoplasm	translation regulator
0.318	0.0456	2610024G14Rik
0.318	0.0993	Snx27		SNX27	sorting nexin family member 27	Cytoplasm	other
0.317	0.027	Wdr34		WDR34	WD repeat domain 34	Cytoplasm	other
0.317	0.0353	Nlrp6		NLRP6	NLR family, pyrin domain containing 6	Plasma Membrane	G-protein coupled receptor
0.317	0.0601	Bola1		BOLA1	bolA homolog 1 (E, coli)	Cytoplasm	other
0.317	0.0898	Chchd2	D	CHCHD2	coiled-coil-helix-coiled-coil-helix domain containing 2	Cytoplasm	other
0.317	0.0982	March2		MARCH2	membrane-associated ring finger (C3HC4) 2, E3 ubiquitin protein ligase	Cytoplasm	enzyme
0.316	0.0482	Pisd		PISD	phosphatidylserine decarboxylase	Cytoplasm	enzyme
0.316	0.0652	Lphn2		LPHN2	latrophilin 2	Plasma Membrane	G-protein coupled receptor
0.316	0.0822	Klhl32		KLHL32	kelch-like 32 (Drosophila)	unknown	other
0.316	0.0942	March8		MARCH8	membrane-associated ring finger (C3HC4) 8, E3 ubiquitin protein ligase	Cytoplasm	enzyme
0.315	0.0478	ENSMUST00000118339
0.315	0.0919	Fam108a		FAM108A1	family with sequence similarity 108, member A1	unknown	enzyme
0.314	0.0345	Pex1		PEX1 (includes EG:100534854)	peroxisomal biogenesis factor 1	Cytoplasm	enzyme
0.313	0.0159	Iars2		IARS2	isoleucyl-tRNA synthetase 2, mitochondrial	Cytoplasm	enzyme
0.313	0.0449	Mrpl11		MRPL11 (includes EG:293666)	mitochondrial ribosomal protein L11	Cytoplasm	other
0.312	0.0308	Ugt3a2	D	UGT3A2	UDP glycosyltransferase 3 family, polypeptide A2	unknown	other
0.312	0.0709	Cxxc5		CXXC5	CXXC finger protein 5	unknown	other
0.312	0.0714	Tm9sf1		TM9SF1	transmembrane 9 superfamily member 1	Plasma Membrane	transporter
0.312	0.0727	Ngef		NGEF	neuronal guanine nucleotide exchange factor	Cytoplasm	other
0.312	0.0761	Aldh5a1		ALDH5A1	aldehyde dehydrogenase 5 family, member A1	Cytoplasm	enzyme	valproic acid
0.312	0.0851	D2hgdh		D2HGDH	D-2-hydroxyglutarate dehydrogenase	Cytoplasm	other
0.312	0.0989	Prr5		PRR5	proline rich 5 (renal)	unknown	other
0.311	0.0297	Rsph3a	D	RSPH3	radial spoke 3 homolog (Chlamydomonas)	unknown	other
0.311	0.0308	Bpgm		BPGM	2,3-bisphosphoglycerate mutase	Extracellular Space	phosphatase
0.311	0.0415	Ctnnbip1		CTNNBIP1	catenin, beta interacting protein 1	Cytoplasm	other
0.311	0.059	Tbccd1		TBCCD1	TBCC domain containing 1	Cytoplasm	other
0.311	0.0769	Mapk4		MAPK4	mitogen-activated protein kinase 4	Cytoplasm	kinase
0.311	0.0834	Ndufs1		NDUFS1	NADH dehydrogenase (ubiquinone) Fe-S protein 1, 75kDa (NADH-coenzyme Q reductase)	Cytoplasm	enzyme
0.31	0.0405	Acbd4		ACBD4	acyl-CoA binding domain containing 4	unknown	other
0.31	0.0475	Psmb1		PSMB1	proteasome (prosome, macropain) subunit, beta type, 1	Cytoplasm	peptidase
0.309	0.014	Tpt1	D	TPT1 (includes EG:100043703)	tumor protein, translationally-controlled 1	Cytoplasm	other
0.309	0.0559	Rab34		RAB34	RAB34, member RAS oncogene family	Cytoplasm	enzyme
0.309	0.0637	Qprt		QPRT	quinolinate phosphoribosyltransferase	Cytoplasm	enzyme
0.309	0.0867	Ubiad1		UBIAD1	UbiA prenyltransferase domain containing 1	Nucleus	enzyme
0.308	0.0302	P2ry1		P2RY1	purinergic receptor P2Y, G-protein coupled, 1	Plasma Membrane	G-protein coupled receptor	clopidogrel
0.308	0.0306	Cpt1a		CPT1A	carnitine palmitoyltransferase 1A (liver)	Cytoplasm	enzyme
0.308	0.0926	ENSMUST00000120961		Gm12026	predicted gene 12026	unknown	other
0.307	0.0603	Arhgap18		ARHGAP18	Rho GTPase activating protein 18	Cytoplasm	other
0.307	0.0709	Spg7		SPG7	spastic paraplegia 7 (pure and complicated autosomal recessive)	Cytoplasm	peptidase
0.307	0.0709	ENSMUST00000153501
0.307	0.0834	Tchh		TCHH	trichohyalin	Cytoplasm	other
0.306	0.0999	AI428936		SYNE4	spectrin repeat containing, nuclear envelope family member 4	Nucleus	other
0.305	0.0356	Trim63		TRIM63	tripartite motif containing 63, E3 ubiquitin protein ligase	Nucleus	enzyme
0.305	0.0572	Cct6b		CCT6B	chaperonin containing TCP1, subunit 6B (zeta 2)	Cytoplasm	transporter
0.304	0.0248	Rsph3a	D	RSPH3	radial spoke 3 homolog (Chlamydomonas)	unknown	other
0.304	0.065	Stk19		STK19	serine/threonine kinase 19	Nucleus	kinase
0.304	0.0708	Dyx1c1		DYX1C1	dyslexia susceptibility 1 candidate 1	Nucleus	other
0.304	0.091	Gramd3		GRAMD3	GRAM domain containing 3	Extracellular Space	other
0.303	0.032	Mdp1		MDP1	magnesium-dependent phosphatase 1	unknown	phosphatase
0.303	0.0523	4933403G14Rik		KIAA1383	KIAA1383	Extracellular Space	other
0.303	0.0869	Oxnad1		OXNAD1	oxidoreductase NAD-binding domain containing 1	Cytoplasm	transporter
0.302	0.0158	Tpt1	D	TPT1 (includes EG:100043703)	tumor protein, translationally-controlled 1	Cytoplasm	other
0.302	0.0968	Gss		GSS	glutathione synthetase	Cytoplasm	enzyme
0.301	0.0348	Ccdc90a		CCDC90A	coiled-coil domain containing 90A	unknown	other
0.301	0.0511	Fam76a		FAM76A	family with sequence similarity 76, member A	unknown	other
0.3	0.0544	Dll1		DLL1	delta-like 1 (Drosophila)	Plasma Membrane	enzyme
0.299	0.019	Dnajc19	D	DNAJC19	DnaJ (Hsp40) homolog, subfamily C, member 19	Cytoplasm	other
0.299	0.0318	Tmem176a		TMEM176A	transmembrane protein 176A	unknown	other
0.299	0.0882	GENSCAN00000041442
0.299	0.0899	Elof1		ELOF1	elongation factor 1 homolog (S, cerevisiae)	Nucleus	other
0.298	0.0582	Nt5dc1		NT5DC1	5'-nucleotidase domain containing 1	unknown	other
0.297	0.033	Ell3		ELL3	elongation factor RNA polymerase II-like 3	Nucleus	transcription regulator
0.297	0.0396	Fam134a		FAM134A	family with sequence similarity 134, member A	unknown	other
0.297	0.0543	Chchd7		CHCHD7	coiled-coil-helix-coiled-coil-helix domain containing 7	Cytoplasm	other
0.296	0.0663	Sigirr		SIGIRR	single immunoglobulin and toll-interleukin 1 receptor (TIR) domain	Plasma Membrane	transmembrane receptor
0.295	0.032	3110007F17Rik		3110007F17Rik (includes others)	predicted gene 5167	Cytoplasm	other
0.295	0.0901	Hoxc10		HOXC11	homeobox C11	Nucleus	other
0.294	0.0489	Ndufb6		NDUFB6	NADH dehydrogenase (ubiquinone) 1 beta subcomplex, 6, 17kDa	Cytoplasm	enzyme
0.294	0.0649	4933403F05Rik		FAM210A	family with sequence similarity 210, member A	Cytoplasm	other
0.293	0.0318	Fbxo3		FBXO3	F-box protein 3	unknown	enzyme
0.293	0.055	Plscr4		PLSCR4	phospholipid scramblase 4	Plasma Membrane	enzyme
0.293	0.0751	Msh3		MSH3 (includes EG:100537314)	mutS homolog 3 (E, coli)	Nucleus	enzyme
0.292	0.0373	Gm10330		Gm10330	predicted gene 10330	unknown	other
0.292	0.0971	Polr2k		POLR2K	polymerase (RNA) II (DNA directed) polypeptide K, 7,0kDa	Nucleus	enzyme
0.291	0.045	Pth1r		PTH1R	parathyroid hormone 1 receptor	Plasma Membrane	G-protein coupled receptor	PTH
0.291	0.0489	Nudt19	D	NUDT19	nudix (nucleoside diphosphate linked moiety X)-type motif 19	Cytoplasm	other
0.291	0.053	Mdm1		MDM1 (includes EG:17245)	Mdm1 nuclear protein homolog (mouse)	unknown	other
0.291	0.0663	Ptk6		PTK6	PTK6 protein tyrosine kinase 6	Cytoplasm	kinase	vandetanib
0.291	0.0709	Fadd		FADD	Fas (TNFRSF6)-associated via death domain	Cytoplasm	other
0.291	0.0993	Rnf181		RNF181	ring finger protein 181	unknown	other
0.29	0.0313	Aspscr1		ASPSCR1	alveolar soft part sarcoma chromosome region, candidate 1	Cytoplasm	other
0.29	0.0947	5430437P03Rik		BABAM1	BRISC and BRCA1 A complex member 1	Nucleus	other
0.289	0.0363	Blvra		BLVRA	biliverdin reductase A	Cytoplasm	enzyme
0.289	0.0418	Vangl1		VANGL1	vang-like 1 (van gogh, Drosophila)	Cytoplasm	other
0.289	0.0711	Gipc2		GIPC2	GIPC PDZ domain containing family, member 2	Cytoplasm	other
0.289	0.0953	BC117090		Stfa1 (includes others)	stefin A1	Cytoplasm	other
0.288	0.0407	Nudt2		NUDT2	nudix (nucleoside diphosphate linked moiety X)-type motif 2	Plasma Membrane	phosphatase
0.287	0.042	Phf15		PHF15	PHD finger protein 15	Nucleus	other
0.286	0.0312	C78339		FAM8A1	family with sequence similarity 8, member A1	unknown	other
0.285	0.0907	Kif21a		KIF21A	kinesin family member 21A	Cytoplasm	other
0.284	0.032	Spata6		SPATA6	spermatogenesis associated 6	unknown	other
0.284	0.0814	Det1		DET1 (includes EG:308775)	de-etiolated homolog 1 (Arabidopsis)	Nucleus	other
0.283	0.0613	Gm8773		Gm8773	predicted gene 8773	unknown	other
0.283	0.0944	Ift88		IFT88	intraflagellar transport 88 homolog (Chlamydomonas)	Cytoplasm	other
0.283	0.099	Igbp1		IGBP1	immunoglobulin (CD79A) binding protein 1	Cytoplasm	phosphatase
0.282	0.0315	Cdc42se1		CDC42SE1	CDC42 small effector 1	Plasma Membrane	other
0.281	0.0468	4930455F23Rik		C1orf114	chromosome 1 open reading frame 114	Nucleus	other
0.281	0.053	Kdm1b		Kdm1b	lysine (K)-specific demethylase 1B	Nucleus	other
0.281	0.0783	Acyp2		ACYP2	acylphosphatase 2, muscle type	Cytoplasm	enzyme
0.28	0.0544	Cyp2j5		Cyp2j5	cytochrome P450, family 2, subfamily j, polypeptide 5	Cytoplasm	enzyme
0.28	0.0658	ENSMUST00000083145
0.28	0.0663	N6amt2		N6AMT2	N-6 adenine-specific DNA methyltransferase 2 (putative)	unknown	enzyme
0.28	0.0731	Ecsit		ECSIT	ECSIT homolog (Drosophila)	Nucleus	transcription regulator
0.28	0.0795	0910001L09Rik		C7orf59	chromosome 7 open reading frame 59	unknown	other
0.279	0.0529	Setd3		SETD3	SET domain containing 3	Nucleus	enzyme
0.279	0.0609	Usp1		USP1	ubiquitin specific peptidase 1	Cytoplasm	peptidase
0.278	0.0501	Map2k3		MAP2K3	mitogen-activated protein kinase kinase 3	Cytoplasm	kinase
0.278	0.061	Fastkd1		FASTKD1	FAST kinase domains 1	Cytoplasm	other
0.278	0.0783	Taldo1		TALDO1	transaldolase 1	Cytoplasm	enzyme
0.277	0.0342	Fam149b		FAM149B1	family with sequence similarity 149, member B1	unknown	other
0.277	0.0559	Mxi1		LOC100360467/Mxi1	MAX interactor 1	Nucleus	other
0.276	0.0363	Ybx1	D	YBX1	Y box binding protein 1	Nucleus	transcription regulator
0.276	0.0439	Vps29		VPS29	vacuolar protein sorting 29 homolog (S, cerevisiae)	Cytoplasm	transporter
0.276	0.0518	Osbpl6		OSBPL6	oxysterol binding protein-like 6	Cytoplasm	other
0.275	0.0375	Zhx2		ZHX2	zinc fingers and homeoboxes 2	Nucleus	transcription regulator
0.275	0.0512	Vps8		VPS8 (includes EG:209018)	vacuolar protein sorting 8 homolog (S, cerevisiae)	unknown	other
0.275	0.0899	Vkorc1		VKORC1	vitamin K epoxide reductase complex, subunit 1	Cytoplasm	enzyme	dicumarol, warfarin
0.274	0.0506	Fundc2		Fundc2	FUN14 domain containing 2	Cytoplasm	other
0.274	0.0657	Dus1l		DUS1L	dihydrouridine synthase 1-like (S, cerevisiae)	unknown	other
0.274	0.0769	Folr1		FOLR1	folate receptor 1 (adult)	Plasma Membrane	transporter
0.274	0.0847	NM_024475,3	D	UBLCP1	ubiquitin-like domain containing CTD phosphatase 1	Nucleus	phosphatase
0.273	0.0398	Ankrd33b	D	ANKRD33B	ankyrin repeat domain 33B	unknown	other
0.273	0.044	Zfp277		ZNF277	zinc finger protein 277	Nucleus	transcription regulator
0.273	0.0544	Stra13		STRA13	stimulated by retinoic acid 13 homolog (mouse)	Nucleus	other
0.273	0.0817	Etfdh		ETFDH	electron-transferring-flavoprotein dehydrogenase	Cytoplasm	enzyme
0.273	0.098	Rnmtl1		RNMTL1	RNA methyltransferase like 1	Cytoplasm	enzyme
0.272	0.0906	Med14		MED14	mediator complex subunit 14	Nucleus	transcription regulator
0.272	0.0994	Tas2r110		Tas2r110	taste receptor, type 2, member 110	Plasma Membrane	G-protein coupled receptor
0.27	0.0553	Sepsecs		SEPSECS	Sep (O-phosphoserine) tRNA:Sec (selenocysteine) tRNA synthase	Cytoplasm	enzyme
0.27	0.0994	Hist1h2bc		Hist1h2bk	histone cluster 1, H2bk	unknown	other
0.269	0.0257	Tpt1	D	TPT1 (includes EG:100043703)	tumor protein, translationally-controlled 1	Cytoplasm	other
0.269	0.0698	Trim37		TRIM37	tripartite motif containing 37	Cytoplasm	enzyme
0.268	0.0538	Fjx1		FJX1	four jointed box 1 (Drosophila)	Extracellular Space	other
0.268	0.0965	Dnajb6	D	DNAJB6	DnaJ (Hsp40) homolog, subfamily B, member 6	Nucleus	transcription regulator
0.268	0.097	Dnajb6	D	DNAJB6	DnaJ (Hsp40) homolog, subfamily B, member 6	Nucleus	transcription regulator
0.267	0.0708	A130010J15Rik		C1orf74	chromosome 1 open reading frame 74	unknown	other
0.267	0.0914	Mapk14		MAPK14	mitogen-activated protein kinase 14	Cytoplasm	kinase	SCIO-469, RO-3201195
0.266	0.0339	Nenf		NENF	neudesin neurotrophic factor	Extracellular Space	growth factor
0.266	0.0559	Krt10		KRT10	keratin 10	Cytoplasm	other
0.266	0.0585	Ush1c		USH1C	Usher syndrome 1C (autosomal recessive, severe)	Cytoplasm	other
0.266	0.0635	Hook2		HOOK2	hook homolog 2 (Drosophila)	Cytoplasm	other
0.266	0.0845	Rnf138		RNF138	ring finger protein 138, E3 ubiquitin protein ligase	unknown	other
0.266	0.0994	Uqcr11		UQCR11	ubiquinol-cytochrome c reductase, complex III subunit XI	Cytoplasm	enzyme
0.265	0.0661	Mrps7		MRPS7	mitochondrial ribosomal protein S7	Cytoplasm	other
0.265	0.0665	Ntn1		NTN1	netrin 1	Extracellular Space	other
0.265	0.0756	Zfand2b		ZFAND2B	zinc finger, AN1-type domain 2B	unknown	other
0.265	0.0801	Dohh		DOHH	deoxyhypusine hydroxylase/monooxygenase	Cytoplasm	enzyme
0.264	0.0409	1110002B05Rik		SPTSSA	serine palmitoyltransferase, small subunit A	Cytoplasm	enzyme
0.264	0.0776	Ankrd42		ANKRD42	ankyrin repeat domain 42	Nucleus	transcription regulator
0.264	0.0842	Paqr3		PAQR3	progestin and adipoQ receptor family member III	Cytoplasm	other
0.263	0.0648	Rmi1		RMI1 (includes EG:306734)	RMI1, RecQ mediated genome instability 1, homolog (S, cerevisiae)	Nucleus	other
0.262	0.0994	Ctnna2		CTNNA2	catenin (cadherin-associated protein), alpha 2	Plasma Membrane	other
0.261	0.0882	Tshz1		TSHZ1	teashirt zinc finger homeobox 1	Nucleus	transcription regulator
0.26	0.0553	Pcca		PCCA	propionyl CoA carboxylase, alpha polypeptide	Cytoplasm	enzyme
0.26	0.0783	Il13ra1		IL13RA1	interleukin 13 receptor, alpha 1	Plasma Membrane	transmembrane receptor	cintredekin besudotox
0.259	0.0553	Prosc		PROSC	proline synthetase co-transcribed homolog (bacterial)	Cytoplasm	enzyme
0.258	0.0798	Arfgap3		Arfgap3	ADP-ribosylation factor GTPase activating protein 3	Cytoplasm	other
0.257	0.0397	Tpt1	D	TPT1 (includes EG:100043703)	tumor protein, translationally-controlled 1	Cytoplasm	other
0.257	0.0405	H3f3a	D	H3f3a	H3 histone, family 3A	Nucleus	other
0.257	0.0947	Pah		PAH	phenylalanine hydroxylase	Cytoplasm	enzyme	(6R)-tetrahydrobiopterin
0.256	0.068	Osbpl2		OSBPL2	oxysterol binding protein-like 2	Cytoplasm	other
0.256	0.0926	2310030N02Rik		NDUFAF6	NADH dehydrogenase (ubiquinone) complex I, assembly factor 6	Cytoplasm	other
0.255	0.0619	Chuk		CHUK	conserved helix-loop-helix ubiquitous kinase	Cytoplasm	kinase	methyl 2-cyano-3,12-dioxoolean-1,9-dien-28-oate
0.255	0.0898	6430527G18Rik		IRF2BPL	interferon regulatory factor 2 binding protein-like	Nucleus	other
0.255	0.0999	Nedd8		NEDD8	neural precursor cell expressed, developmentally down-regulated 8	Nucleus	enzyme
0.254	0.0332	Map3k4		MAP3K4	mitogen-activated protein kinase kinase kinase 4	Cytoplasm	kinase
0.254	0.0457	Suclg1		SUCLG1	succinate-CoA ligase, alpha subunit	Cytoplasm	enzyme
0.254	0.0709	S100b		S100B	S100 calcium binding protein B	Cytoplasm	other
0.253	0.0541	Ndufa4		NDUFA4	NADH dehydrogenase (ubiquinone) 1 alpha subcomplex, 4, 9kDa	Cytoplasm	enzyme
0.253	0.069	1110038D17Rik		C22orf13	chromosome 22 open reading frame 13	unknown	other
0.252	0.071	ENSMUST00000121361
0.252	0.086	H2afy3		H2afy3	H2A histone family, member Y3	Nucleus	other
0.252	0.087	Crygb		CRYGB	crystallin, gamma B	Nucleus	other
0.252	0.0989	Trpc1		TRPC1	transient receptor potential cation channel, subfamily C, member 1	Plasma Membrane	ion channel
0.251	0.0572	Gdi2		GDI2	GDP dissociation inhibitor 2	Cytoplasm	other
0.251	0.0834	Ergic3		ERGIC3	ERGIC and golgi 3	Cytoplasm	other
0.25	0.0661	ENSMUST00000120917
0.249	0.048	Ap1s1		AP1S1	adaptor-related protein complex 1, sigma 1 subunit	Cytoplasm	transporter
0.249	0.0926	Serf1		SERF1A/SERF1B	small EDRK-rich factor 1A (telomeric)	unknown	other
0.249	0.0994	2010007H12Rik
0.248	0.0851	Fuca1		FUCA1	fucosidase, alpha-L- 1, tissue	Cytoplasm	enzyme
0.247	0.0604	1110032A13Rik
0.247	0.0866	Stard7		STARD7	StAR-related lipid transfer (START) domain containing 7	unknown	other
0.247	0.0867	Vldlr		VLDLR	very low density lipoprotein receptor	Plasma Membrane	transporter
0.245	0.0384	Lyrm4		LYRM4	LYR motif containing 4	Cytoplasm	other
0.245	0.072	Lysmd1	D	LYSMD1	LysM, putative peptidoglycan-binding, domain containing 1	unknown	other
0.245	0.0767	Lysmd1	D	LYSMD1	LysM, putative peptidoglycan-binding, domain containing 1	unknown	other
0.245	0.0788	3830406C13Rik		C3orf14	chromosome 3 open reading frame 14	unknown	other
0.245	0.0944	Tmem143		TMEM143	transmembrane protein 143	Cytoplasm	other
0.244	0.0506	Aldh6a1		ALDH6A1	aldehyde dehydrogenase 6 family, member A1	Cytoplasm	enzyme
0.244	0.0649	Phkb		PHKB	phosphorylase kinase, beta	Cytoplasm	kinase
0.244	0.0837	Gm9949		Gm9949	predicted gene 9949	unknown	other
0.243	0.0936	Olfr993		OR5AK2	olfactory receptor, family 5, subfamily AK, member 2	Plasma Membrane	G-protein coupled receptor
0.243	0.0961	Zfp637		ZNF32	zinc finger protein 32	Nucleus	other
0.241	0.0753	Adipor1		ADIPOR1	adiponectin receptor 1	Plasma Membrane	transmembrane receptor
0.241	0.0857	Dnajc2		DNAJC2	DnaJ (Hsp40) homolog, subfamily C, member 2	Nucleus	other
0.241	0.0866	Ddx41		DDX41	DEAD (Asp-Glu-Ala-Asp) box polypeptide 41	Nucleus	enzyme
0.241	0.0953	Polr1d		POLR1D	polymerase (RNA) I polypeptide D, 16kDa	Nucleus	enzyme
0.24	0.0641	Zfp820		Zfp820	zinc finger protein 820	unknown	other
0.24	0.0761	2810432D09Rik		RPP25L	ribonuclease P/MRP 25kDa subunit-like	unknown	other
0.24	0.0892	Etv5		ETV5	ets variant 5	Nucleus	transcription regulator
0.239	0.0657	Thap7		THAP7	THAP domain containing 7	Nucleus	transcription regulator
0.239	0.0794	Kcnj15		KCNJ15	potassium inwardly-rectifying channel, subfamily J, member 15	Plasma Membrane	ion channel
0.239	0.0901	Lin54		LIN54	lin-54 homolog (C, elegans)	Nucleus	other
0.239	0.0923	Pdpr		PDPR	pyruvate dehydrogenase phosphatase regulatory subunit	Cytoplasm	enzyme
0.238	0.0783	ENSMUST00000119530
0.238	0.0803	Ddrgk1		DDRGK1	DDRGK domain containing 1	Extracellular Space	other
0.238	0.0833	Fads3		FADS3	fatty acid desaturase 3	Plasma Membrane	enzyme
0.235	0.061	Thap6		THAP6	THAP domain containing 6	unknown	other
0.235	0.0755	2810428I15Rik		C19orf60	chromosome 19 open reading frame 60	unknown	other
0.235	0.0984	Amn		AMN	amnionless homolog (mouse)	Plasma Membrane	other
0.234	0.0728	Crtap		CRTAP	cartilage associated protein	Extracellular Space	other
0.234	0.0867	ENSMUST00000054221
0.233	0.0708	Eif2a		EIF2A	eukaryotic translation initiation factor 2A, 65kDa	Cytoplasm	translation regulator
0.233	0.0986	Isca1		ISCA1	iron-sulfur cluster assembly 1 homolog (S, cerevisiae)	Cytoplasm	other
0.232	0.0488	GENSCAN00000027066
0.232	0.053	H2afj		H2AFJ	H2A histone family, member J	unknown	other
0.232	0.061	Ppp1r16a		PPP1R16A	protein phosphatase 1, regulatory subunit 16A	Plasma Membrane	other
0.232	0.0663	Dalrd3		DALRD3	DALR anticodon binding domain containing 3	unknown	other
0.232	0.0754	Mfhas1		MFHAS1	malignant fibrous histiocytoma amplified sequence 1	Cytoplasm	other
0.232	0.0769	Ubxn6		UBXN6	UBX domain protein 6	Cytoplasm	other
0.231	0.0836	Sirt7		SIRT7	sirtuin 7	Nucleus	enzyme
0.231	0.0886	Syde2		SYDE2	synapse defective 1, Rho GTPase, homolog 2 (C, elegans)	Cytoplasm	other
0.23	0.0517	Carkd		CARKD	carbohydrate kinase domain containing	Cytoplasm	enzyme
0.23	0.0687	Stard10		STARD10	StAR-related lipid transfer (START) domain containing 10	Cytoplasm	other
0.23	0.0865	Fam40a		FAM40A	family with sequence similarity 40, member A	Nucleus	other
0.229	0.0649	ENSMUST00000084002
0.229	0.0663	Nae1		NAE1	NEDD8 activating enzyme E1 subunit 1	Cytoplasm	enzyme
0.229	0.0808	Pold3		POLD3	polymerase (DNA-directed), delta 3, accessory subunit	Nucleus	transcription regulator
0.228	0.073	1810043G02Rik		C21orf2	chromosome 21 open reading frame 2	unknown	other
0.227	0.0749	Lipi		LIPI	lipase, member I	Extracellular Space	enzyme
0.226	0.0645	Gramd4		GRAMD4	GRAM domain containing 4	unknown	other
0.225	0.0466	Nsa2	D	NSA2	NSA2 ribosome biogenesis homolog (S, cerevisiae)	Nucleus	other
0.225	0.0528	Pvrl3		PVRL3	poliovirus receptor-related 3	Plasma Membrane	other
0.225	0.0949	Mrpl44		MRPL44 (includes EG:301552)	mitochondrial ribosomal protein L44	Cytoplasm	enzyme
0.224	0.0919	GENSCAN00000009002
0.224	0.099	Sall2		SALL2	sal-like 2 (Drosophila)	Nucleus	transcription regulator
0.223	0.0729	Prdx5		PRDX5	peroxiredoxin 5	Cytoplasm	enzyme
0.222	0.0776	B020018G12Rik
0.222	0.0919	Asnsd1		ASNSD1	asparagine synthetase domain containing 1	unknown	enzyme
0.221	0.0663	D17Wsu104e		C19orf10	chromosome 19 open reading frame 10	Extracellular Space	cytokine
0.22	0.0842	Rarres1		RARRES1	retinoic acid receptor responder (tazarotene induced) 1	Plasma Membrane	other
0.218	0.0798	Pigq		PIGQ	phosphatidylinositol glycan anchor biosynthesis, class Q	Cytoplasm	enzyme
0.218	0.0864	Casd1		CASD1	CAS1 domain containing 1	Cytoplasm	enzyme
0.217	0.0753	Usp4		USP4	ubiquitin specific peptidase 4 (proto-oncogene)	Nucleus	peptidase
0.217	0.0958	Tmem27		TMEM27	transmembrane protein 27	Plasma Membrane	other
0.216	0.0575	Ltn1	D	LTN1	listerin E3 ubiquitin protein ligase 1	Nucleus	enzyme
0.216	0.082	Hadh		HADH	hydroxyacyl-CoA dehydrogenase	Cytoplasm	enzyme
0.215	0.0708	Capn7		CAPN7	calpain 7	Cytoplasm	peptidase
0.214	0.0967	Mtmr14		MTMR14	myotubularin related protein 14	unknown	phosphatase
0.214	0.0974	1300003B13Rik
0.213	0.0855	Tmem189		TMEM189	transmembrane protein 189	unknown	other
0.213	0.0944	Fah		FAH	fumarylacetoacetate hydrolase (fumarylacetoacetase)	Cytoplasm	enzyme
0.212	0.0674	Paip2		PAIP2	poly(A) binding protein interacting protein 2	Cytoplasm	translation regulator
0.211	0.08	Ptdss1		PTDSS1	phosphatidylserine synthase 1	Cytoplasm	enzyme
0.208	0.053	Nsa2	D	NSA2	NSA2 ribosome biogenesis homolog (S, cerevisiae)	Nucleus	other
0.207	0.0717	Wipi2		WIPI2	WD repeat domain, phosphoinositide interacting 2	Cytoplasm	other
0.207	0.0868	Tex2		TEX2	testis expressed 2	unknown	other
0.206	0.0882	Rps27l		Rps27l	ribosomal protein S27-like	unknown	other
0.205	0.0999	Ccdc105		CCDC105	coiled-coil domain containing 105	unknown	other
0.204	0.084	Gpx1		GPX1 (includes EG:14775)	glutathione peroxidase 1	Cytoplasm	enzyme
0.203	0.0866	Rer1		RER1	RER1 retention in endoplasmic reticulum 1 homolog (S, cerevisiae)	Cytoplasm	other
0.2	0.0648	H3f3a	D	H3f3a	H3 histone, family 3A	Nucleus	other
0.2	0.0846	Chrd		CHRD	chordin	Extracellular Space	other
0.196	0.0783	Slc27a2		SLC27A2	solute carrier family 27 (fatty acid transporter), member 2	Cytoplasm	transporter
0.194	0.0762	Slc35c2		SLC35C2	solute carrier family 35, member C2	unknown	transporter
0.194	0.0942	Mllt3		MLLT3	myeloid/lymphoid or mixed-lineage leukemia (trithorax homolog, Drosophila); translocated to, 3	Nucleus	other
-0.186	0.0882	Fgd5		FGD5	FYVE, RhoGEF and PH domain containing 5	Cytoplasm	other
-0.19	0.0864	Afap1		AFAP1	actin filament associated protein 1	Cytoplasm	other
-0.197	0.0869	Micall1		MICALL1	MICAL-like 1	Cytoplasm	other
-0.209	0.0875	Zfp516		ZNF516	zinc finger protein 516	Nucleus	other
-0.21	0.064	Abcc5		ABCC5	ATP-binding cassette, sub-family C (CFTR/MRP), member 5	Plasma Membrane	transporter
-0.21	0.0878	Ptbp2		PTBP2	polypyrimidine tract binding protein 2	Nucleus	other
-0.215	0.0881	Sox7		SOX7	SRY (sex determining region Y)-box 7	Nucleus	transcription regulator
-0.217	0.0995	Ablim1		ABLIM1	actin binding LIM protein 1	Cytoplasm	other
-0.22	0.0923	Mkl1		MKL1	megakaryoblastic leukemia (translocation) 1	Nucleus	transcription regulator
-0.22	0.0982	Rai14		RAI14	retinoic acid induced 14	Nucleus	transcription regulator
-0.221	0.0594	ENSMUST00000083733
-0.222	0.0837	Lrrc49		LRRC49	leucine rich repeat containing 49	unknown	other
-0.222	0.0847	Maged2		MAGED2	melanoma antigen family D, 2	Plasma Membrane	other
-0.223	0.0509	Adamts3		ADAMTS3	ADAM metallopeptidase with thrombospondin type 1 motif, 3	Extracellular Space	peptidase
-0.223	0.0869	ENSMUST00000083018
-0.224	0.0942	Elmo2		ELMO2	engulfment and cell motility 2	Cytoplasm	other
-0.225	0.0598	Cyth1		CYTH1	cytohesin 1	Cytoplasm	other
-0.225	0.0845	Sbno2		SBNO2	strawberry notch homolog 2 (Drosophila)	unknown	transcription regulator
-0.226	0.0538	Dock6	D	DOCK6	dedicator of cytokinesis 6	Cytoplasm	other
-0.226	0.0663	BC048671		C3orf22	chromosome 3 open reading frame 22	unknown	other
-0.226	0.0968	E130112L23Rik
-0.227	0.0815	Sept10		SEPT10	septin 10	Cytoplasm	transcription regulator
-0.228	0.0814	Atp8b2		UBAP2L	ubiquitin associated protein 2-like	unknown	other
-0.228	0.0967	Inhba		INHBA	inhibin, beta A	Extracellular Space	growth factor
-0.228	0.0994	Fam164a		ZC2HC1A	zinc finger, C2HC-type containing 1A	unknown	other
-0.229	0.0771	Pml		PML	promyelocytic leukemia	Nucleus	transcription regulator	arsenic trioxide
-0.23	0.0447	Pcdhga12		PCDHGA12	protocadherin gamma subfamily A, 12	Plasma Membrane	other
-0.23	0.0927	Dlgap4		DLGAP4	discs, large (Drosophila) homolog-associated protein 4	Plasma Membrane	other
-0.23	0.097	Dip2b		DIP2B	DIP2 disco-interacting protein 2 homolog B (Drosophila)	unknown	other
-0.231	0.0663	Kif26b	D	KIF26B	kinesin family member 26B	unknown	other
-0.232	0.0747	Wbp7		MLL4	myeloid/lymphoid or mixed-lineage leukemia 4	Nucleus	transcription regulator
-0.233	0.0953	Lhfpl2		LHFPL2	lipoma HMGIC fusion partner-like 2	unknown	enzyme
-0.235	0.0714	Atp1b3		ATP1B3	ATPase, Na+/K+ transporting, beta 3 polypeptide	Plasma Membrane	transporter
-0.235	0.0714	Glra1		GLRA1	glycine receptor, alpha 1	Plasma Membrane	ion channel
-0.235	0.073	Slk		SLK	STE20-like kinase	Nucleus	kinase
-0.235	0.0802	Zscan18		ZSCAN18	zinc finger and SCAN domain containing 18	unknown	other
-0.235	0.0847	Cenpt		CENPT	centromere protein T	Cytoplasm	other
-0.236	0.0761	Zdhhc15		ZDHHC15	zinc finger, DHHC-type containing 15	unknown	enzyme
-0.237	0.0408	Syngap1		SYNGAP1	synaptic Ras GTPase activating protein 1	Plasma Membrane	other
-0.237	0.0755	Rusc2		RUSC2	RUN and SH3 domain containing 2	unknown	other
-0.239	0.0491	Bicc1	D	BICC1	bicaudal C homolog 1 (Drosophila)	unknown	other
-0.24	0.0663	Plxna2		PLXNA2	plexin A2	Plasma Membrane	transmembrane receptor
-0.24	0.0663	Slc30a8		SLC30A8	solute carrier family 30 (zinc transporter), member 8	Cytoplasm	transporter
-0.24	0.0898	Glrp1		Glrp1	glutamine repeat protein 1	unknown	other
-0.24	0.0928	Eml4		EML4	echinoderm microtubule associated protein like 4	Cytoplasm	other
-0.242	0.0649	Tnfrsf22		Tnfrsf22/Tnfrsf23	tumor necrosis factor receptor superfamily, member 22	Plasma Membrane	transmembrane receptor
-0.242	0.0911	Tcl1b4		Tcl1b4 (includes others)	T cell leukemia/lymphoma 1B, 4	unknown	other
-0.243	0.0525	Tet3		TET3	tet methylcytosine dioxygenase 3	unknown	other
-0.243	0.0947	Notch2		NOTCH2	notch 2	Plasma Membrane	transcription regulator
-0.244	0.0472	Sec24b		SEC24B	SEC24 family, member B (S, cerevisiae)	Cytoplasm	transporter
-0.244	0.0882	Prmt2		PRMT2	protein arginine methyltransferase 2	Nucleus	enzyme
-0.246	0.0457	Hdac7		HDAC7	histone deacetylase 7	Nucleus	transcription regulator	tributyrin, belinostat, pyroxamide, vorinostat, romidepsin
-0.246	0.0507	Mir199a-1		mir-199	microRNA 199a-2	Cytoplasm	microRNA
-0.246	0.0835	Chd2		CHD2	chromodomain helicase DNA binding protein 2	Nucleus	enzyme
-0.247	0.0828	Jag1		JAG1	jagged 1	Extracellular Space	growth factor
-0.247	0.0911	Zfp521		ZNF521	zinc finger protein 521	Nucleus	other
-0.248	0.058	Rgs19		RGS19	regulator of G-protein signaling 19	Cytoplasm	other
-0.248	0.0836	Amotl1		AMOTL1	angiomotin like 1	Plasma Membrane	other
-0.248	0.099	Fryl		FRYL	FRY-like	unknown	other
-0.249	0.0509	Arhgef1		ARHGEF1	Rho guanine nucleotide exchange factor (GEF) 1	Cytoplasm	other
-0.249	0.0882	Phgdh		PHGDH	phosphoglycerate dehydrogenase	Cytoplasm	enzyme
-0.249	0.0919	Pvrl1		PVRL1	poliovirus receptor-related 1 (herpesvirus entry mediator C)	Plasma Membrane	other
-0.25	0.039	Synj2		SYNJ2	synaptojanin 2	Cytoplasm	phosphatase
-0.25	0.071	ENSMUST00000083872
-0.251	0.0633	Gga3		GGA3	golgi-associated, gamma adaptin ear containing, ARF binding protein 3	Cytoplasm	transporter
-0.251	0.0717	Mir23b		mir-23	microRNA 23a	Cytoplasm	microRNA
-0.251	0.0943	Srsf13b
-0.252	0.0512	Wipf2		WIPF2	WAS/WASL interacting protein family, member 2	unknown	other
-0.253	0.0582	Lrrk1		LRRK1	leucine-rich repeat kinase 1	Cytoplasm	kinase
-0.253	0.0613	Gjc1		GJC1	gap junction protein, gamma 1, 45kDa	Plasma Membrane	transporter
-0.253	0.0695	Flt4		FLT4	fms-related tyrosine kinase 4	Plasma Membrane	transmembrane receptor	sunitinib, pazopanib, axitinib, CEP 7055, tivozanib, telatinib, sorafenib, vandetanib
-0.253	0.074	Bat2
-0.254	0.0521	Smarcb1		SMARCB1	SWI/SNF related, matrix associated, actin dependent regulator of chromatin, subfamily b, member 1	Nucleus	transcription regulator
-0.254	0.0669	Arhgap8		ARHGAP8/PRR5-ARHGAP8	Rho GTPase activating protein 8	Cytoplasm	other
-0.254	0.0737	Cast		CAST	calpastatin	Cytoplasm	peptidase
-0.254	0.0822	Lpcat4		LPCAT4	lysophosphatidylcholine acyltransferase 4	Cytoplasm	enzyme
-0.255	0.0617	Dclk1		Dclk1	doublecortin-like kinase 1	Cytoplasm	kinase
-0.255	0.0914	Slc44a2		SLC44A2	solute carrier family 44, member 2	Extracellular Space	transporter
-0.256	0.0615	Slc22a15		SLC22A15	solute carrier family 22, member 15	unknown	transporter
-0.256	0.0714	Casz1		CASZ1	castor zinc finger 1	Nucleus	enzyme
-0.257	0.0899	Sh3d20
-0.258	0.0638	LOC100043315		LOC100043315	uncharacterized LOC100043315	unknown	other
-0.258	0.0758	Foxp1		FOXP1	forkhead box P1	Nucleus	transcription regulator
-0.259	0.0479	F11r		F11R	F11 receptor	Plasma Membrane	other
-0.259	0.0917	Rod1		PTBP3	polypyrimidine tract binding protein 3	Nucleus	other
-0.259	0.092	Slc24a6		SLC24A6	solute carrier family 24 (sodium/lithium/calcium exchanger), member 6	Plasma Membrane	transporter
-0.259	0.0989	ENSMUST00000117963
-0.26	0.0839	Tmem123		TMEM123 (includes EG:114908)	transmembrane protein 123	Plasma Membrane	other
-0.262	0.0312	Tjp1		TJP1	tight junction protein 1 (zona occludens 1)	Plasma Membrane	other
-0.262	0.0449	Mark1		MARK1	MAP/microtubule affinity-regulating kinase 1	Cytoplasm	kinase
-0.263	0.0469	Mtap7d1		MAP7D1	MAP7 domain containing 1	unknown	other
-0.265	0.0892	Atrx		ATRX	alpha thalassemia/mental retardation syndrome X-linked	Nucleus	transcription regulator
-0.267	0.0373	Nup214		NUP214	nucleoporin 214kDa	Nucleus	transporter
-0.267	0.0509	Hoxd3		HOXD3	homeobox D3	Nucleus	transcription regulator
-0.267	0.0604	Serpind1		SERPIND1	serpin peptidase inhibitor, clade D (heparin cofactor), member 1	Extracellular Space	other
-0.267	0.0871	4632427E13Rik		4632427E13Rik	RIKEN cDNA 4632427E13 gene	unknown	other
-0.268	0.0773	Hspa2		HSPA2	heat shock 70kDa protein 2	Cytoplasm	other
-0.268	0.0773	Mmrn2		MMRN2	multimerin 2	Extracellular Space	other
-0.268	0.0807	Dag1		DAG1	dystroglycan 1 (dystrophin-associated glycoprotein 1)	Plasma Membrane	transmembrane receptor
-0.269	0.0801	Erg		ERG	v-ets erythroblastosis virus E26 oncogene homolog (avian)	Nucleus	transcription regulator
-0.269	0.0871	Emilin1		EMILIN1	elastin microfibril interfacer 1	Extracellular Space	other
-0.27	0.072	Gm52
-0.27	0.0989	Pcdhb2		PCDHB2	protocadherin beta 2	Plasma Membrane	other
-0.27	0.0999	Csrnp1		CSRNP1	cysteine-serine-rich nuclear protein 1	Nucleus	transcription regulator
-0.271	0.0276	Capn5		CAPN5	calpain 5	Cytoplasm	peptidase
-0.271	0.0396	Pacs1		PACS1	phosphofurin acidic cluster sorting protein 1	Cytoplasm	other
-0.271	0.0834	Nfe2l1		NFE2L1	nuclear factor (erythroid-derived 2)-like 1	Nucleus	transcription regulator
-0.273	0.0562	Gatad2b		GATAD2B	GATA zinc finger domain containing 2B	Nucleus	transcription regulator
-0.274	0.0689	Specc1		SPECC1	sperm antigen with calponin homology and coiled-coil domains 1	Nucleus	other
-0.274	0.076	Arsa		ARSA	arylsulfatase A	Cytoplasm	enzyme
-0.275	0.0711	Rgl3		RGL3	ral guanine nucleotide dissociation stimulator-like 3	Cytoplasm	other
-0.276	0.045	Gltscr1		GLTSCR1	glioma tumor suppressor candidate region gene 1	Extracellular Space	other
-0.277	0.091	Wfikkn1		WFIKKN1	WAP, follistatin/kazal, immunoglobulin, kunitz and netrin domain containing 1	Cytoplasm	other
-0.277	0.0926	Rgs6		RGS6	regulator of G-protein signaling 6	Cytoplasm	enzyme
-0.277	0.0992	Rasd2		RASD2	RASD family, member 2	Cytoplasm	enzyme
-0.278	0.0589	Dip2c		DIP2C	DIP2 disco-interacting protein 2 homolog C (Drosophila)	unknown	other
-0.278	0.0709	Slc4a9		SLC4A9	solute carrier family 4, sodium bicarbonate cotransporter, member 9	Plasma Membrane	transporter
-0.278	0.0798	Nkd1		NKD1	naked cuticle homolog 1 (Drosophila)	unknown	other
-0.278	0.0942	Zfp784		ZNF784	zinc finger protein 784	unknown	other
-0.279	0.0975	Sh2d4b		SH2D4B	SH2 domain containing 4B	unknown	other
-0.28	0.0663	Rasl11a		RASL11A	RAS-like, family 11, member A	Nucleus	other
-0.28	0.0994	Nav2		NAV2	neuron navigator 2	Nucleus	other
-0.282	0.0572	Zmiz1	D	ZMIZ1	zinc finger, MIZ-type containing 1	Nucleus	other
-0.282	0.0684	Sipa1		SIPA1	signal-induced proliferation-associated 1	Cytoplasm	other
-0.283	0.016	Wt1		WT1	Wilms tumor 1	Nucleus	transcription regulator
-0.283	0.0469	Ptprj	D	PTPRJ	protein tyrosine phosphatase, receptor type, J	Plasma Membrane	phosphatase
-0.283	0.0649	Dock7		DOCK7	dedicator of cytokinesis 7	Plasma Membrane	other
-0.283	0.0718	ENSMUST00000122404		Gm6682	tubulin, alpha 1C pseudogene	unknown	other
-0.283	0.0893	Spna2		SPTAN1	spectrin, alpha, non-erythrocytic 1	Plasma Membrane	other
-0.284	0.0278	Fmnl3		FMNL3	formin-like 3	Cytoplasm	other
-0.284	0.0375	Lrp5		LRP5	low density lipoprotein receptor-related protein 5	Plasma Membrane	transmembrane receptor
-0.284	0.061	Gimap8		GIMAP8	GTPase, IMAP family member 8	unknown	other
-0.284	0.0663	Kank4		KANK4	KN motif and ankyrin repeat domains 4	Cytoplasm	other
-0.284	0.0709	Tmem100		TMEM100	transmembrane protein 100	unknown	other
-0.285	0.0611	Akap2		AKAP2/PALM2-AKAP2	A kinase (PRKA) anchor protein 2	Cytoplasm	other
-0.285	0.0684	Apoc2		APOC2	apolipoprotein C-II	Extracellular Space	transporter
-0.285	0.07	GENSCAN00000039192
-0.285	0.0936	Gm10419		Gm10419	predicted gene 10419	unknown	other
-0.285	0.0973	Cspg4		CSPG4	chondroitin sulfate proteoglycan 4	Plasma Membrane	other
-0.286	0.0466	Mtap4		MAP4	microtubule-associated protein 4	Cytoplasm	other
-0.286	0.0511	Dchs1		DCHS1	dachsous 1 (Drosophila)	Plasma Membrane	other
-0.286	0.0809	Cyth3		CYTH3	cytohesin 3	Cytoplasm	transporter
-0.286	0.0864	Plp2	D	PLP2	proteolipid protein 2 (colonic epithelium-enriched)	Cytoplasm	transporter
-0.286	0.0942	Lbh		LBH	limb bud and heart development homolog (mouse)	Nucleus	transcription regulator
-0.287	0.0398	Dnm1		DNM1	dynamin 1	Cytoplasm	enzyme
-0.287	0.0843	St6galnac4		ST6GALNAC4	ST6 (alpha-N-acetyl-neuraminyl-2,3-beta-galactosyl-1,3)-N-acetylgalactosaminide alpha-2,6-sialyltransferase 4	Cytoplasm	enzyme
-0.288	0.045	Podxl		PODXL	podocalyxin-like	Plasma Membrane	kinase
-0.288	0.0491	Atg16l2		ATG16L2	autophagy related 16-like 2 (S, cerevisiae)	Extracellular Space	other
-0.288	0.0669	Gm10375	D	CDV3	CDV3 homolog (mouse)	unknown	other
-0.288	0.0709	Mpp3		MPP3	membrane protein, palmitoylated 3 (MAGUK p55 subfamily member 3)	Plasma Membrane	kinase
-0.288	0.0757	Mitf		MITF	microphthalmia-associated transcription factor	Nucleus	transcription regulator
-0.288	0.0885	Pcsk9		PCSK9	proprotein convertase subtilisin/kexin type 9	Extracellular Space	peptidase
-0.289	0.0264	Sesn3		SESN3	sestrin 3	Extracellular Space	other
-0.289	0.082	Abca7		ABCA7	ATP-binding cassette, sub-family A (ABC1), member 7	Plasma Membrane	transporter
-0.291	0.0308	Rftn1		RFTN1	raftlin, lipid raft linker 1	Plasma Membrane	other
-0.291	0.0313	Tmem131		TMEM131	transmembrane protein 131	Extracellular Space	other
-0.291	0.0399	Esam		ESAM	endothelial cell adhesion molecule	Plasma Membrane	other
-0.291	0.0629	Trerf1		TRERF1	transcriptional regulating factor 1	Nucleus	transcription regulator
-0.291	0.0767	Tmtc1		TMTC1	transmembrane and tetratricopeptide repeat containing 1	Cytoplasm	other
-0.292	0.0285	Sept11		SEPT11	septin 11	Nucleus	other
-0.292	0.0397	Calm2		Calm1 (includes others)	calmodulin 1	Nucleus	other
-0.292	0.0441	Clasp1		CLASP1	cytoplasmic linker associated protein 1	Cytoplasm	other
-0.292	0.0489	Mbp		Mbp	myelin basic protein	Extracellular Space	other
-0.292	0.0714	A230050P20Rik		C19orf66	chromosome 19 open reading frame 66	unknown	other
-0.292	0.0766	Hivep1		HIVEP1	human immunodeficiency virus type I enhancer binding protein 1	Nucleus	transcription regulator
-0.292	0.0814	Zeb1		ZEB1	zinc finger E-box binding homeobox 1	Nucleus	transcription regulator
-0.293	0.0363	Dbn1		DBN1	drebrin 1	Cytoplasm	other
-0.293	0.0544	Tuba1b	D	TUBA1B	tubulin, alpha 1b	Cytoplasm	other
-0.293	0.0682	Ttc28	D	TTC28	tetratricopeptide repeat domain 28	unknown	other
-0.293	0.0866	Bat2l2
-0.293	0.0882	Zfp57		ZFP57	zinc finger protein 57 homolog (mouse)	Nucleus	transcription regulator
-0.294	0.1	Atn1		ATN1	atrophin 1	Nucleus	transcription regulator
-0.295	0.0572	Sh3bgrl		SH3BGRL	SH3 domain binding glutamic acid-rich protein like	Cytoplasm	other
-0.295	0.0709	Slc12a4		SLC12A4	solute carrier family 12 (potassium/chloride transporters), member 4	Plasma Membrane	transporter
-0.295	0.088	Axin2		AXIN2	axin 2	Cytoplasm	other
-0.296	0.0215	Syne1	D	SYNE1	spectrin repeat containing, nuclear envelope 1	Nucleus	other
-0.296	0.0749	Gys1		GYS1	glycogen synthase 1 (muscle)	Cytoplasm	enzyme
-0.297	0.0271	Wasf2		WASF2	WAS protein family, member 2	Cytoplasm	other
-0.297	0.0531	Fam53b		FAM53B	family with sequence similarity 53, member B	unknown	other
-0.297	0.0999	Slc39a6		SLC39A6	solute carrier family 39 (zinc transporter), member 6	Plasma Membrane	transporter
-0.298	0.014	Shroom3		SHROOM3	shroom family member 3	Cytoplasm	other
-0.298	0.0292	Tbc1d4		TBC1D4	TBC1 domain family, member 4	Cytoplasm	other
-0.298	0.0469	Ahnak		AHNAK	AHNAK nucleoprotein	Nucleus	other
-0.298	0.0491	Zfp658		ZNF546	zinc finger protein 546	Nucleus	other
-0.298	0.0572	Hoxb3		HOXB3	homeobox B3	Nucleus	transcription regulator
-0.298	0.077	Hpgds		HPGDS	hematopoietic prostaglandin D synthase	Cytoplasm	enzyme
-0.298	0.083	Mef2d		MEF2D	myocyte enhancer factor 2D	Nucleus	transcription regulator
-0.298	0.0876	Olfr420		OR6K2	olfactory receptor, family 6, subfamily K, member 2	Plasma Membrane	G-protein coupled receptor
-0.299	0.0885	Fmnl2		Fmnl2	formin-like 2	unknown	other
-0.3	0.0348	Atp8a1		ATP8A1	ATPase, aminophospholipid transporter (APLT), class I, type 8A, member 1	Cytoplasm	transporter
-0.3	0.0517	Gpr56		GPR56	G protein-coupled receptor 56	Plasma Membrane	G-protein coupled receptor
-0.3	0.074	Bace1		BACE1	beta-site APP-cleaving enzyme 1	Cytoplasm	peptidase
-0.3	0.0799	P2ry14		P2RY14	purinergic receptor P2Y, G-protein coupled, 14	Plasma Membrane	G-protein coupled receptor
-0.3	0.097	Nphs1		NPHS1	nephrosis 1, congenital, Finnish type (nephrin)	Plasma Membrane	other
-0.302	0.0241	Ptpro		PTPRO	protein tyrosine phosphatase, receptor type, O	Plasma Membrane	phosphatase
-0.302	0.037	Ehd4		EHD4	EH-domain containing 4	Plasma Membrane	enzyme
-0.302	0.0942	Cacna1g		CACNA1G	calcium channel, voltage-dependent, T type, alpha 1G subunit	Plasma Membrane	ion channel	mibefradil
-0.303	0.048	Gm10375	D	CDV3	CDV3 homolog (mouse)	unknown	other
-0.303	0.048	Gm10375	D	CDV3	CDV3 homolog (mouse)	unknown	other
-0.303	0.0608	Ank2		ANK2	ankyrin 2, neuronal	Plasma Membrane	other
-0.304	0.0261	St5		ST5	suppression of tumorigenicity 5	unknown	enzyme
-0.304	0.0386	Macf1		MACF1	microtubule-actin crosslinking factor 1	Cytoplasm	enzyme
-0.304	0.0867	Gpr182		GPR182	G protein-coupled receptor 182	Plasma Membrane	G-protein coupled receptor
-0.304	0.0882	Pak3		PAK3	p21 protein (Cdc42/Rac)-activated kinase 3	Cytoplasm	kinase
-0.305	0.0334	Rtn4rl1		RTN4RL1	reticulon 4 receptor-like 1	Plasma Membrane	other
-0.305	0.0554	Dock6	D	DOCK6	dedicator of cytokinesis 6	Cytoplasm	other
-0.305	0.0709	Lrrc3b		LRRC3B	leucine rich repeat containing 3B	unknown	other
-0.306	0.0629	St6galnac3		ST6GALNAC3	ST6 (alpha-N-acetyl-neuraminyl-2,3-beta-galactosyl-1,3)-N-acetylgalactosaminide alpha-2,6-sialyltransferase 3	Cytoplasm	enzyme
-0.307	0.0248	Tuba1c		TUBA1C	tubulin, alpha 1c	Cytoplasm	other	epothilone B, ixabepilone, colchicine/probenecid, XRP9881, eribulin, AL 108, EC145, NPI-2358, milataxel, TPI 287, TTI-237, docetaxel, vinflunine, vinorelbine, vincristine, vinblastine, paclitaxel, podophyllotoxin, colchicine
-0.307	0.049	Cmtm7		CMTM7	CKLF-like MARVEL transmembrane domain containing 7	Extracellular Space	cytokine
-0.308	0.0443	Sh3rf1		SH3RF1	SH3 domain containing ring finger 1	Cytoplasm	other
-0.308	0.0491	Prkd2		PRKD2	protein kinase D2	Cytoplasm	kinase
-0.308	0.0605	Chrnb1		CHRNB1	cholinergic receptor, nicotinic, beta 1 (muscle)	Plasma Membrane	transmembrane receptor	ABT-089, isoflurane, mecamylamine, succinylcholine, rocuronium, doxacurium, amobarbital, mivacurium, pipecuronium, rapacuronium, metocurine, atracurium, cisatracurium, acetylcholine, nicotine, D-tubocurarine, arecoline, enflurane, pancuronium, vecuronium
-0.308	0.087	Ptgfrn		PTGFRN	prostaglandin F2 receptor negative regulator	Plasma Membrane	other
-0.308	0.0942	Ybx2		YBX2	Y box binding protein 2	Cytoplasm	translation regulator
-0.309	0.034	Myl7		MYL7	myosin, light chain 7, regulatory	Cytoplasm	enzyme
-0.309	0.0881	Ywhah		YWHAH	tyrosine 3-monooxygenase/tryptophan 5-monooxygenase activation protein, eta polypeptide	Cytoplasm	transcription regulator
-0.309	0.093	Brd4		BRD4	bromodomain containing 4	Nucleus	kinase
-0.31	0.048	Msi2		MSI2	musashi homolog 2 (Drosophila)	Cytoplasm	other
-0.31	0.0608	Solh		SOLH	small optic lobes homolog (Drosophila)	unknown	peptidase
-0.31	0.0701	Ints3		INTS3	integrator complex subunit 3	Nucleus	other
-0.311	0.0637	Lamc1		LAMC1	laminin, gamma 1 (formerly LAMB2)	Extracellular Space	other
-0.312	0.088	Dock6	D	DOCK6	dedicator of cytokinesis 6	Cytoplasm	other
-0.313	0.0408	Pde4a		PDE4A	phosphodiesterase 4A, cAMP-specific	Cytoplasm	enzyme	arofylline, tetomilast, L 869298, anagrelide, cilomilast, milrinone, rolipram, L-826,141, amrinone, roflumilast, pentoxifylline, caffeine
-0.313	0.0855	Plxnd1		PLXND1	plexin D1	Plasma Membrane	transmembrane receptor
-0.313	0.0952	Zfp248		ZNF248	zinc finger protein 248	Nucleus	other
-0.313	0.0994	Tmem98		TMEM98	transmembrane protein 98	Cytoplasm	other
-0.314	0.032	Atf7		ATF7	activating transcription factor 7	Nucleus	transcription regulator
-0.314	0.0605	Cdh3		CDH3	cadherin 3, type 1, P-cadherin (placental)	Plasma Membrane	other
-0.314	0.07	NM_001081962,1		SAP25	Sin3A-associated protein, 25kDa	unknown	other
-0.314	0.0773	Med15		MED15	mediator complex subunit 15	Nucleus	transcription regulator
-0.316	0.0342	Helz		HELZ	helicase with zinc finger	Nucleus	enzyme
-0.316	0.0898	Gm6484		C19orf80	chromosome 19 open reading frame 80	unknown	other
-0.317	0.048	Ifi27l2b		IFI27L2	interferon, alpha-inducible protein 27-like 2	unknown	other
-0.317	0.058	Mr1		MR1	major histocompatibility complex, class I-related	Plasma Membrane	transmembrane receptor
-0.318	0.053	Col6a3		COL6A3	collagen, type VI, alpha 3	Extracellular Space	other	collagenase clostridium histolyticum
-0.318	0.0659	Tbc1d24		TBC1D24	TBC1 domain family, member 24	Cytoplasm	other
-0.319	0.029	Tuba1b	D	TUBA1B	tubulin, alpha 1b	Cytoplasm	other
-0.319	0.077	Sap130		SAP130	Sin3A-associated protein, 130kDa	Nucleus	transcription regulator
-0.319	0.0783	Cerk		CERK	ceramide kinase	Plasma Membrane	kinase
-0.32	0.0251	Itpr3		ITPR3	inositol 1,4,5-trisphosphate receptor, type 3	Cytoplasm	ion channel
-0.32	0.0491	Bicc1	D	BICC1	bicaudal C homolog 1 (Drosophila)	unknown	other
-0.32	0.0798	Jmjd1c		JMJD1C	jumonji domain containing 1C	Nucleus	other
-0.321	0.0771	Crebbp		CREBBP	CREB binding protein	Nucleus	transcription regulator
-0.322	0.0225	Jak3		JAK3	Janus kinase 3	Cytoplasm	kinase
-0.322	0.0729	Ptprm		PTPRM (includes EG:19274)	protein tyrosine phosphatase, receptor type, M	Plasma Membrane	phosphatase
-0.324	0.0373	Plp2	D	PLP2	proteolipid protein 2 (colonic epithelium-enriched)	Cytoplasm	transporter
-0.324	0.0458	Itpkb		ITPKB	inositol-trisphosphate 3-kinase B	Cytoplasm	kinase
-0.325	0.0249	Cldn7		CLDN7	claudin 7	Plasma Membrane	other
-0.325	0.0956	Mxra8		MXRA8	matrix-remodelling associated 8	unknown	other
-0.327	0.0506	Fam168a		FAM168A	family with sequence similarity 168, member A	unknown	other
-0.327	0.0847	NM_016928,2		TLR5	toll-like receptor 5	Plasma Membrane	transmembrane receptor
-0.327	0.098	Amigo2		AMIGO2	adhesion molecule with Ig-like domain 2	Plasma Membrane	other
-0.328	0.0247	Asph		Asph	aspartate-beta-hydroxylase	unknown	other
-0.328	0.0409	Sepn1		SEPN1	selenoprotein N, 1	Cytoplasm	other
-0.329	0.0708	Mical3		MICAL3	microtubule associated monoxygenase, calponin and LIM domain containing 3	Cytoplasm	enzyme
-0.33	0.0198	Dagla		DAGLA	diacylglycerol lipase, alpha	Plasma Membrane	enzyme
-0.33	0.071	Gm10825		Gm10825	predicted gene 10825	unknown	other
-0.331	0.0292	Mef2a		Mef2a	myocyte enhancer factor 2a	Nucleus	other
-0.331	0.032	Notch1		NOTCH1	notch 1	Plasma Membrane	transcription regulator
-0.331	0.0771	Rrbp1		Rrbp1	ribosome binding protein 1	Cytoplasm	transporter
-0.331	0.0881	Ctbp2		CTBP2	C-terminal binding protein 2	Nucleus	transcription regulator
-0.332	0.0375	Tm4sf1		TM4SF1	transmembrane 4 L six family member 1	Plasma Membrane	other
-0.332	0.0507	Zfp532		ZNF532	zinc finger protein 532	Nucleus	other
-0.333	0.0351	Arhgap31		ARHGAP31	Rho GTPase activating protein 31	Cytoplasm	other
-0.333	0.0545	Setbp1		SETBP1	SET binding protein 1	Nucleus	other
-0.334	0.027	Tcf7l1		TCF7L1	transcription factor 7-like 1 (T-cell specific, HMG-box)	Nucleus	transcription regulator
-0.334	0.032	Ptprj	D	PTPRJ	protein tyrosine phosphatase, receptor type, J	Plasma Membrane	phosphatase
-0.334	0.0325	Cldn15		CLDN15	claudin 15	Plasma Membrane	other
-0.334	0.0358	Wnk1	D	Wnk1	WNK lysine deficient protein kinase 1	Cytoplasm	kinase
-0.334	0.0869	Pdgfra		PDGFRA	platelet-derived growth factor receptor, alpha polypeptide	Plasma Membrane	kinase	sunitinib, pazopanib, axitinib, telatinib, imatinib, becaplermin
-0.334	0.0929	Cox6b2		COX6B2	cytochrome c oxidase subunit VIb polypeptide 2 (testis)	Cytoplasm	enzyme
-0.335	0.0469	Itpripl2		ITPRIPL2	inositol 1,4,5-trisphosphate receptor interacting protein-like 2	unknown	other
-0.335	0.0889	4930412O13Rik		4930412O13Rik	RIKEN cDNA 4930412O13 gene	unknown	other
-0.336	0.0841	Tagln3		TAGLN3	transgelin 3	Extracellular Space	other
-0.338	0.0601	BC037703		MAB21L3	mab-21-like 3 (C, elegans)	unknown	other
-0.338	0.0643	Mical2		MICAL2	microtubule associated monoxygenase, calponin and LIM domain containing 2	Cytoplasm	enzyme
-0.338	0.0994	Filip1l		FILIP1L	filamin A interacting protein 1-like	Nucleus	other
-0.339	0.0153	Itga1		ITGA1	integrin, alpha 1	Plasma Membrane	other
-0.339	0.0223	Epb4,1l1		EPB41L1	erythrocyte membrane protein band 4,1-like 1	Plasma Membrane	other
-0.339	0.058	Ptgs1		PTGS1	prostaglandin-endoperoxide synthase 1 (prostaglandin G/H synthase and cyclooxygenase)	Cytoplasm	enzyme	acetaminophen/pentazocine, acetaminophen/clemastine/pseudoephedrine, aspirin/butalbital/caffeine, acetaminophen/caffeine/dihydrocodeine, aspirin/hydrocodone, aspirin/oxycodone, acetaminophen/aspirin/caffeine, aspirin/pravastatin, acetaminophen/dexbromphen
-0.339	0.088	ENSMUST00000082631
-0.34	0.0199	Itsn1		ITSN1	intersectin 1 (SH3 domain protein)	Cytoplasm	other
-0.34	0.0511	Iqgap1		IQGAP1	IQ motif containing GTPase activating protein 1	Cytoplasm	other
-0.34	0.0669	Prrg1		PRRG1	proline rich Gla (G-carboxyglutamic acid) 1	Plasma Membrane	other
-0.34	0.0709	Dusp18		DUSP18	dual specificity phosphatase 18	Cytoplasm	phosphatase
-0.34	0.0943	GENSCAN00000043842
-0.341	0.0323	Lxn		LXN	latexin	Cytoplasm	other
-0.341	0.0454	Hn1		HN1	hematological and neurological expressed 1	Nucleus	other
-0.341	0.0693	Sorcs2		SORCS2	sortilin-related VPS10 domain containing receptor 2	Plasma Membrane	transporter
-0.341	0.0822	Kdm5c		KDM5C	lysine (K)-specific demethylase 5C	Nucleus	other
-0.341	0.0866	Setd1b	D	SETD1B	SET domain containing 1B	Nucleus	other
-0.341	0.0889	Zfp9		ZNF25	zinc finger protein 25	Nucleus	other
-0.342	0.0499	Klhl29		KLHL29	kelch-like 29 (Drosophila)	unknown	other
-0.342	0.0749	St3gal2		ST3GAL2	ST3 beta-galactoside alpha-2,3-sialyltransferase 2	Cytoplasm	enzyme
-0.342	0.0901	Vat1		VAT1	vesicle amine transport protein 1 homolog (T, californica)	Plasma Membrane	transporter
-0.343	0.0197	Lfng		LFNG	LFNG O-fucosylpeptide 3-beta-N-acetylglucosaminyltransferase	Cytoplasm	enzyme
-0.343	0.0396	Dock6	D	DOCK6	dedicator of cytokinesis 6	Cytoplasm	other
-0.343	0.0523	Dlg4		DLG4	discs, large homolog 4 (Drosophila)	Plasma Membrane	kinase
-0.343	0.0528	Mir99a		mir-99	microRNA 100	Cytoplasm	microRNA
-0.343	0.0663	Nfat5		NFAT5	nuclear factor of activated T-cells 5, tonicity-responsive	Nucleus	transcription regulator
-0.343	0.0933	Cd14		CD14	CD14 molecule	Plasma Membrane	transmembrane receptor
-0.344	0.0136	Plxna1		PLXNA1	plexin A1	Plasma Membrane	transmembrane receptor
-0.344	0.0405	Slc12a3		SLC12A3	solute carrier family 12 (sodium/chloride transporters), member 3	Plasma Membrane	transporter	deserpidine/methyclothiazide, amlodipine/valsartan/hydrochlorothiazide, aliskiren/amlodipine/hydrochlorothiazide, lisinopril/hydrochlorothiazide, losartan/hydrochlorothiazide, valsartan/hydrochlorothiazide, triamterene/hydrochlorothiazide, bisoprolol/hydr
-0.345	0.0232	Dock6	D	DOCK6	dedicator of cytokinesis 6	Cytoplasm	other
-0.345	0.027	Rere		RERE	arginine-glutamic acid dipeptide (RE) repeats	Nucleus	other
-0.345	0.0396	Aff1	D	AFF1	AF4/FMR2 family, member 1	Nucleus	transcription regulator
-0.345	0.0919	Mmp23		MMP23B	matrix metallopeptidase 23B	Extracellular Space	peptidase
-0.346	0.043	Fat1		FAT1	FAT tumor suppressor homolog 1 (Drosophila)	Plasma Membrane	other
-0.346	0.047	Col4a2		COL4A2	collagen, type IV, alpha 2	Extracellular Space	other	collagenase clostridium histolyticum
-0.346	0.0621	Atp8b1		ATP8B1	ATPase, aminophospholipid transporter, class I, type 8B, member 1	Plasma Membrane	transporter
-0.346	0.07	Hoxb4		HOXB4	homeobox B4	Nucleus	transcription regulator
-0.346	0.0757	Rap1gap2		RAP1GAP2	RAP1 GTPase activating protein 2	Cytoplasm	other
-0.346	0.0994	Asap1		ASAP1	ArfGAP with SH3 domain, ankyrin repeat and PH domain 1	Plasma Membrane	other
-0.347	0.0597	Dvl3		DVL3	dishevelled, dsh homolog 3 (Drosophila)	Cytoplasm	other
-0.348	0.0653	Cdk18		CDK18	cyclin-dependent kinase 18	Cytoplasm	kinase
-0.348	0.0714	Sh3pxd2a		SH3PXD2A	SH3 and PX domains 2A	Cytoplasm	other
-0.349	0.0479	Nbea		Nbea	neurobeachin	unknown	other
-0.349	0.0687	Rasl11b		RASL11B	RAS-like, family 11, member B	unknown	enzyme
-0.35	0.0822	Tmem71		TMEM71	transmembrane protein 71	unknown	other
-0.35	0.0855	Ptpn14		PTPN14	protein tyrosine phosphatase, non-receptor type 14	Cytoplasm	phosphatase
-0.351	0.0297	Col4a1		COL4A1	collagen, type IV, alpha 1	Extracellular Space	other	collagenase clostridium histolyticum
-0.351	0.0564	Acpp		ACPP	acid phosphatase, prostate	Extracellular Space	phosphatase
-0.352	0.0229	Tuba1b	D	TUBA1B	tubulin, alpha 1b	Cytoplasm	other
-0.352	0.0363	Mrgpre		MRGPRE	MAS-related GPR, member E	Plasma Membrane	G-protein coupled receptor
-0.352	0.0418	Ccdc88a		CCDC88A	coiled-coil domain containing 88A	Cytoplasm	other
-0.352	0.0454	Arl9		ARL9	ADP-ribosylation factor-like 9	unknown	other
-0.353	0.0967	Emp2		EMP2	epithelial membrane protein 2	Plasma Membrane	other
-0.354	0.0469	Nfatc2		NFATC2	nuclear factor of activated T-cells, cytoplasmic, calcineurin-dependent 2	Nucleus	transcription regulator
-0.355	0.0175	Trp53inp2		TP53INP2	tumor protein p53 inducible nuclear protein 2	Nucleus	other
-0.355	0.041	ENSMUST00000082596
-0.355	0.065	Frk		FRK	fyn-related kinase	Nucleus	kinase
-0.356	0.0501	St3gal1		ST3GAL1	ST3 beta-galactoside alpha-2,3-sialyltransferase 1	Cytoplasm	enzyme
-0.356	0.053	Setd1b	D	SETD1B	SET domain containing 1B	Nucleus	other
-0.357	0.0277	Svil		SVIL	supervillin	Plasma Membrane	other
-0.357	0.0944	ENSMUST00000083841
-0.359	0.0332	Rbfox2		RBFOX2	RNA binding protein, fox-1 homolog (C, elegans) 2	Nucleus	transcription regulator
-0.36	0.0336	Tpcn2		TPCN2	two pore segment channel 2	Cytoplasm	ion channel
-0.36	0.0396	Tkt		TKT	transketolase	Cytoplasm	enzyme
-0.36	0.0661	Cacnb2		CACNB2	calcium channel, voltage-dependent, beta 2 subunit	Plasma Membrane	ion channel
-0.36	0.0981	Alcam		ALCAM	activated leukocyte cell adhesion molecule	Plasma Membrane	other
-0.361	0.00964	Arpc1b	D	ARPC1B	actin related protein 2/3 complex, subunit 1B, 41kDa	Cytoplasm	other
-0.361	0.0211	Srcap		SRCAP	Snf2-related CREBBP activator protein	Cytoplasm	transcription regulator
-0.361	0.0332	Lamb2		LAMB2	laminin, beta 2 (laminin S)	Extracellular Space	enzyme
-0.363	0.0171	Vps13c		VPS13C	vacuolar protein sorting 13 homolog C (S, cerevisiae)	unknown	other
-0.363	0.0271	Mdfic		MDFIC	MyoD family inhibitor domain containing	Nucleus	other
-0.363	0.0321	Plekhh2		PLEKHH2	pleckstrin homology domain containing, family H (with MyTH4 domain) member 2	Cytoplasm	other
-0.363	0.0605	Prkg1		PRKG1	protein kinase, cGMP-dependent, type I	Cytoplasm	kinase
-0.363	0.079	Dennd2d		DENND2D	DENN/MADD domain containing 2D	Cytoplasm	other
-0.364	0.0309	Lama5		LAMA5	laminin, alpha 5	Extracellular Space	other
-0.364	0.0312	Cd34		CD34	CD34 molecule	Plasma Membrane	other
-0.365	0.0194	Zmiz1	D	ZMIZ1	zinc finger, MIZ-type containing 1	Nucleus	other
-0.365	0.0207	Efna5		EFNA5	ephrin-A5	Plasma Membrane	kinase
-0.365	0.0359	Fam38a	D	PIEZO1	piezo-type mechanosensitive ion channel component 1	Cytoplasm	ion channel
-0.365	0.053	Gas7		GAS7	growth arrest-specific 7	Cytoplasm	transcription regulator
-0.365	0.0989	Necab1		NECAB1	N-terminal EF-hand calcium binding protein 1	Cytoplasm	other
-0.366	0.0207	Zmiz1	D	ZMIZ1	zinc finger, MIZ-type containing 1	Nucleus	other
-0.366	0.0366	Aff1	D	AFF1	AF4/FMR2 family, member 1	Nucleus	transcription regulator
-0.366	0.0454	Shank3		SHANK3	SH3 and multiple ankyrin repeat domains 3	Cytoplasm	transcription regulator
-0.367	0.0334	Kcnj10		KCNJ10	potassium inwardly-rectifying channel, subfamily J, member 10	Plasma Membrane	ion channel
-0.367	0.0335	Dock6	D	DOCK6	dedicator of cytokinesis 6	Cytoplasm	other
-0.367	0.0408	Cdc42ep2		CDC42EP2	CDC42 effector protein (Rho GTPase binding) 2	Plasma Membrane	other
-0.367	0.0582	Hoxd10		HOXD10	homeobox D10	Nucleus	transcription regulator
-0.367	0.073	Vamp5		VAMP5	vesicle-associated membrane protein 5 (myobrevin)	Plasma Membrane	transporter
-0.368	0.0506	Grik5		GRIK5	glutamate receptor, ionotropic, kainate 5	Plasma Membrane	ion channel
-0.368	0.0548	2900073G15Rik
-0.368	0.0589	Ttc39b		TTC39B	tetratricopeptide repeat domain 39B	unknown	other
-0.368	0.0942	Sp110		SP110	SP110 nuclear body protein	Nucleus	other
-0.369	0.0579	Susd1		SUSD1	sushi domain containing 1	unknown	other
-0.369	0.0714	Sept8		SEPT8	septin 8	Extracellular Space	other
-0.37	0.0375	Frmd4a		FRMD4A	FERM domain containing 4A	Plasma Membrane	other
-0.37	0.079	Aldh18a1		ALDH18A1	aldehyde dehydrogenase 18 family, member A1	Cytoplasm	kinase
-0.371	0.0211	Ermp1		ERMP1	endoplasmic reticulum metallopeptidase 1	Cytoplasm	other
-0.371	0.0429	Arhgef17		ARHGEF17	Rho guanine nucleotide exchange factor (GEF) 17	Cytoplasm	other
-0.372	0.0644	Samd4		SAMD4A	sterile alpha motif domain containing 4A	Cytoplasm	translation regulator
-0.373	0.0523	Hipk2		HIPK2	homeodomain interacting protein kinase 2	Nucleus	kinase
-0.374	0.0629	Creb3l1		CREB3L1	cAMP responsive element binding protein 3-like 1	Nucleus	transcription regulator
-0.374	0.0794	Msn		MSN	moesin	Plasma Membrane	other
-0.375	0.0644	Itga9		ITGA9	integrin, alpha 9	Plasma Membrane	other
-0.375	0.0938	Calcrl		CALCRL	calcitonin receptor-like	Plasma Membrane	G-protein coupled receptor
-0.376	0.014	Syne1	D	SYNE1	spectrin repeat containing, nuclear envelope 1	Nucleus	other
-0.377	0.0598	Tnfsf15		TNFSF15	tumor necrosis factor (ligand) superfamily, member 15	Extracellular Space	cytokine
-0.377	0.0898	Rab15		Rab15	RAB15, member RAS oncogene family	Cytoplasm	enzyme
-0.378	0.0135	Fbxl16		FBXL16	F-box and leucine-rich repeat protein 16	unknown	other
-0.379	0.0231	Mecom	D	MECOM	MDS1 and EVI1 complex locus	Nucleus	transcription regulator
-0.379	0.0848	Mrc2		MRC2	mannose receptor, C type 2	Plasma Membrane	transmembrane receptor
-0.38	0.0261	9030418K01Rik		FAM217B	family with sequence similarity 217, member B	unknown	other
-0.38	0.0308	Col18a1		COL18A1	collagen, type XVIII, alpha 1	Extracellular Space	other	collagenase clostridium histolyticum
-0.38	0.0332	Adcy6		ADCY6	adenylate cyclase 6	Plasma Membrane	enzyme
-0.38	0.0797	Tiam1		TIAM1	T-cell lymphoma invasion and metastasis 1	Cytoplasm	other
-0.381	0.0454	Pcdhb18		PCDHB10	protocadherin beta 10	Plasma Membrane	other
-0.382	0.0104	Thsd7a		THSD7A	thrombospondin, type I, domain containing 7A	unknown	other
-0.382	0.0106	Csdc2		CSDC2	cold shock domain containing C2, RNA binding	Cytoplasm	other
-0.382	0.0345	Kdelr3		KDELR3	KDEL (Lys-Asp-Glu-Leu) endoplasmic reticulum protein retention receptor 3	Cytoplasm	transporter
-0.382	0.0472	Stat3		STAT3	signal transducer and activator of transcription 3 (acute-phase response factor)	Nucleus	transcription regulator
-0.382	0.0785	Epb4,1l4b		FRRS1L	ferric-chelate reductase 1-like	Cytoplasm	transporter
-0.383	0.0309	Rhoj		RHOJ	ras homolog family member J	Cytoplasm	enzyme
-0.383	0.0848	Gap43		GAP43	growth associated protein 43	Plasma Membrane	other
-0.384	0.0544	Bcat2		BCAT2	branched chain amino-acid transaminase 2, mitochondrial	Cytoplasm	enzyme
-0.384	0.0572	Plat		PLAT	plasminogen activator, tissue	Extracellular Space	peptidase
-0.385	0.0403	Myo1d	D	MYO1D	myosin ID	Plasma Membrane	other
-0.385	0.0629	Ppl		PPL	periplakin	Cytoplasm	other
-0.385	0.088	Ckmt1		CKMT1A/CKMT1B	creatine kinase, mitochondrial 1B	Cytoplasm	kinase
-0.386	0.0318	B230120H23Rik		ZAK	sterile alpha motif and leucine zipper containing kinase AZK	Cytoplasm	kinase
-0.388	0.013	Thsd4		THSD4	thrombospondin, type I, domain containing 4	Cytoplasm	other
-0.388	0.0408	Endod1		ENDOD1	endonuclease domain containing 1	Extracellular Space	enzyme
-0.388	0.0708	Gm7265		Gm7265	predicted gene 7265	unknown	other
-0.388	0.0874	Maml3		MAML3	mastermind-like 3 (Drosophila)	Nucleus	transcription regulator
-0.389	0.0663	Cyp2d22		Cyp2d22	cytochrome P450, family 2, subfamily d, polypeptide 22	Cytoplasm	enzyme
-0.39	0.0396	Etl4		KIAA1217	KIAA1217	Cytoplasm	other
-0.39	0.0878	L1cam		L1CAM	L1 cell adhesion molecule	Plasma Membrane	other
-0.39	0.0955	Itpr2		ITPR2	inositol 1,4,5-trisphosphate receptor, type 2	Cytoplasm	ion channel
-0.391	0.0751	Slc41a3		Slc41a3	solute carrier family 41, member 3	unknown	other
-0.393	0.0223	Dcbld2		DCBLD2	discoidin, CUB and LCCL domain containing 2	Plasma Membrane	other
-0.394	0.0143	Sipa1l3		Sipa1l3	signal-induced proliferation-associated 1 like 3	unknown	other
-0.395	0.0222	Kank3		KANK3	KN motif and ankyrin repeat domains 3	Cytoplasm	other
-0.396	0.0347	Il18bp		IL18BP	interleukin 18 binding protein	Extracellular Space	other
-0.396	0.0396	Pcdhb19		PCDHB11	protocadherin beta 11	Plasma Membrane	other
-0.396	0.0553	Plec		PLEC	plectin	Cytoplasm	other
-0.396	0.0822	Spns2		SPNS2	spinster homolog 2 (Drosophila)	unknown	other
-0.397	0.0325	Mecom	D	MECOM	MDS1 and EVI1 complex locus	Nucleus	transcription regulator
-0.397	0.0373	Sema3d		SEMA3D	sema domain, immunoglobulin domain (Ig), short basic domain, secreted, (semaphorin) 3D	Extracellular Space	other
-0.397	0.0598	Camk1d		CAMK1D	calcium/calmodulin-dependent protein kinase ID	Cytoplasm	kinase
-0.398	0.0559	Slc4a3		SLC4A3	solute carrier family 4, anion exchanger, member 3	Plasma Membrane	transporter
-0.398	0.0613	Fkbp10		FKBP10	FK506 binding protein 10, 65 kDa	Cytoplasm	enzyme
-0.398	0.0828	Ache		ACHE	acetylcholinesterase	Plasma Membrane	enzyme	ZT-1, ladostigil, CHF-2060, atropine/edrophonium, BW 284 C 51, neostigmine, 2,3 butanedione monoxime, echothiophate, tacrine, edrophonium, isoflurophate, pyridostigmine, demecarium, ambenonium, donepezil, pralidoxime, rivastigmine, thiamine, huperzine A,
-0.399	0.0386	Pdgfrb		PDGFRB	platelet-derived growth factor receptor, beta polypeptide	Plasma Membrane	kinase	dasatinib, sunitinib, pazopanib, axitinib, tivozanib, tandutinib, imatinib, sorafenib, becaplermin
-0.399	0.054	Grk5		GRK5	G protein-coupled receptor kinase 5	Plasma Membrane	kinase
-0.399	0.0968	Anxa2		ANXA2	annexin A2	Plasma Membrane	other
-0.4	0.0155	Tbc1d9		TBC1D9	TBC1 domain family, member 9 (with GRAM domain)	Plasma Membrane	other
-0.4	0.0506	Gm10560		Gm10560	predicted gene 10560	unknown	other
-0.4	0.0541	Alg14		ALG14 (includes EG:199857)	asparagine-linked glycosylation 14 homolog (S, cerevisiae)	Cytoplasm	enzyme
-0.4	0.0993	Fgd3		FGD3	FYVE, RhoGEF and PH domain containing 3	Cytoplasm	other
-0.404	0.0712	Pcdhb16		PCDHB8	protocadherin beta 8	Plasma Membrane	other
-0.405	0.0162	Tmem63a		TMEM63A	transmembrane protein 63A	Cytoplasm	other
-0.405	0.0413	Col1a1		COL1A1 (includes EG:1277)	collagen, type I, alpha 1	Extracellular Space	other	collagenase clostridium histolyticum
-0.406	0.0459	Setd7		SETD7	SET domain containing (lysine methyltransferase) 7	Nucleus	enzyme
-0.407	0.0559	Meis2		MEIS2	Meis homeobox 2	Nucleus	transcription regulator
-0.407	0.0614	Epn3		EPN3	epsin 3	Cytoplasm	other
-0.408	0.0143	Csnk1e		CSNK1E	casein kinase 1, epsilon	Cytoplasm	kinase
-0.408	0.0312	Tacc1		TACC1	transforming, acidic coiled-coil containing protein 1	Nucleus	other
-0.408	0.0949	Gramd1b		GRAMD1B	GRAM domain containing 1B	unknown	other
-0.409	0.0463	Fam38b		PIEZO2	piezo-type mechanosensitive ion channel component 2	unknown	ion channel
-0.409	0.0837	Colec12		COLEC12	collectin sub-family member 12	Plasma Membrane	transmembrane receptor
-0.409	0.0879	Fads1		FADS1	fatty acid desaturase 1	Plasma Membrane	enzyme
-0.409	0.0953	Slc7a1		SLC7A1	solute carrier family 7 (cationic amino acid transporter, y+ system), member 1	Plasma Membrane	transporter
-0.41	0.0479	Gm8165	D	CDV3	CDV3 homolog (mouse)	unknown	other
-0.41	0.0489	Mir344	D	mir-344	microRNA 344	Cytoplasm	microRNA
-0.41	0.0517	Col15a1		COL15A1	collagen, type XV, alpha 1	Extracellular Space	other	collagenase clostridium histolyticum
-0.41	0.0714	Edn1		EDN1	endothelin 1	Extracellular Space	cytokine
-0.41	0.0893	Man1c1		MAN1C1	mannosidase, alpha, class 1C, member 1	Cytoplasm	enzyme
-0.411	0.0861	Peg3		PEG3	paternally expressed 3	Nucleus	kinase
-0.411	0.0989	Lepr		LEPR	leptin receptor	Plasma Membrane	transmembrane receptor
-0.412	0.0297	Ptprb		PTPRB	protein tyrosine phosphatase, receptor type, B	Plasma Membrane	phosphatase
-0.412	0.041	Zcchc11		ZCCHC11	zinc finger, CCHC domain containing 11	Nucleus	enzyme
-0.412	0.0822	Odz4		ODZ4	odz, odd Oz/ten-m homolog 4 (Drosophila)	unknown	other
-0.413	0.0215	Klf7		KLF7	Kruppel-like factor 7 (ubiquitous)	Nucleus	transcription regulator
-0.413	0.0271	Synpo		SYNPO	synaptopodin	Cytoplasm	other
-0.413	0.053	A430110L20Rik		A430110L20Rik	RIKEN cDNA A430110L20 gene	unknown	other
-0.414	0.00925	Adrbk2		ADRBK2	adrenergic, beta, receptor kinase 2	Cytoplasm	kinase
-0.414	0.01	Stxbp1		STXBP1	syntaxin binding protein 1	Cytoplasm	transporter
-0.414	0.0281	Olfml2b		OLFML2B	olfactomedin-like 2B	Extracellular Space	other
-0.414	0.0993	ENSMUST00000102401
-0.415	0.034	Myh9		MYH9 (includes EG:17886)	myosin, heavy chain 9, non-muscle	Cytoplasm	transporter
-0.415	0.0464	Cd9		CD9	CD9 molecule	Plasma Membrane	other
-0.417	0.00954	Pla2g4a		PLA2G4A	phospholipase A2, group IVA (cytosolic, calcium-dependent)	Cytoplasm	enzyme
-0.418	0.0143	Crim1		CRIM1	cysteine rich transmembrane BMP regulator 1 (chordin-like)	Extracellular Space	kinase
-0.419	0.00964	Dock6	D	DOCK6	dedicator of cytokinesis 6	Cytoplasm	other
-0.419	0.0442	Mir344	D	mir-344	microRNA 344	Cytoplasm	microRNA
-0.419	0.0466	Mras		MRAS	muscle RAS oncogene homolog	Plasma Membrane	enzyme
-0.42	0.0657	Tcfap2a
-0.421	0.014	Lpp	D	LPP	LIM domain containing preferred translocation partner in lipoma	Nucleus	other
-0.421	0.026	Pea15a		PEA15	phosphoprotein enriched in astrocytes 15	Cytoplasm	transporter
-0.421	0.0708	Col1a2		COL1A2	collagen, type I, alpha 2	Extracellular Space	other	collagenase clostridium histolyticum
-0.421	0.0911	B4galnt1		B4GALNT1	beta-1,4-N-acetyl-galactosaminyl transferase 1	Cytoplasm	enzyme
-0.421	0.0937	Chd7		CHD7	chromodomain helicase DNA binding protein 7	Nucleus	enzyme
-0.422	0.0171	ENSMUST00000082812
-0.424	0.0342	Mlxip		MLXIP	MLX interacting protein	Nucleus	other
-0.425	0.088	Crip1		CRIP1	cysteine-rich protein 1 (intestinal)	Cytoplasm	other
-0.426	0.0339	Diap1		DIAPH1	diaphanous homolog 1 (Drosophila)	Plasma Membrane	other
-0.427	0.012	Bmp1		BMP1	bone morphogenetic protein 1	Extracellular Space	peptidase
-0.427	0.0309	4931406H21Rik		4931406H21Rik	RIKEN cDNA 4931406H21 gene	unknown	other
-0.427	0.0491	Hoxd4		HOXD4	homeobox D4	Nucleus	transcription regulator
-0.427	0.0548	Cdh5		CDH5	cadherin 5, type 2 (vascular endothelium)	Plasma Membrane	other
-0.427	0.0575	Sulf2		SULF2	sulfatase 2	Plasma Membrane	enzyme
-0.428	0.0456	Rab8b		RAB8B	RAB8B, member RAS oncogene family	Cytoplasm	enzyme
-0.429	0.0663	ENSMUST00000121448
-0.43	0.0159	Lpp	D	LPP	LIM domain containing preferred translocation partner in lipoma	Nucleus	other
-0.43	0.0401	Tenc1		Tenc1	tensin like C1 domain containing phosphatase (tensin 2)	unknown	other
-0.43	0.075	C1qtnf1		C1QTNF1	C1q and tumor necrosis factor related protein 1	Extracellular Space	other
-0.431	0.014	Sema5a		SEMA5A	sema domain, seven thrombospondin repeats (type 1 and type 1-like), transmembrane domain (TM) and short cytoplasmic domain, (semaphorin) 5A	Plasma Membrane	transmembrane receptor
-0.431	0.0215	Enox1		ENOX1	ecto-NOX disulfide-thiol exchanger 1	Plasma Membrane	other
-0.431	0.0238	C230081A13Rik		PEAK1	NKF3 kinase family member	Plasma Membrane	kinase
-0.432	0.0444	BC147361
-0.433	0.0342	Pdlim7		PDLIM7	PDZ and LIM domain 7 (enigma)	Cytoplasm	other
-0.434	0.00763	Dock6	D	DOCK6	dedicator of cytokinesis 6	Cytoplasm	other
-0.434	0.0225	Plxnb1		Plxnb1	plexin B1	unknown	other
-0.434	0.0232	Enah		ENAH	enabled homolog (Drosophila)	Plasma Membrane	other
-0.434	0.0396	Gpr4		GPR4	G protein-coupled receptor 4	Plasma Membrane	G-protein coupled receptor
-0.435	0.0251	Nav1		NAV1	neuron navigator 1	Cytoplasm	enzyme
-0.436	0.00519	Plvap		PLVAP	plasmalemma vesicle associated protein	Plasma Membrane	other
-0.436	0.0347	Ptprs		PTPRS	protein tyrosine phosphatase, receptor type, S	Plasma Membrane	phosphatase
-0.436	0.0737	Chst15		CHST15	carbohydrate (N-acetylgalactosamine 4-sulfate 6-O) sulfotransferase 15	Plasma Membrane	enzyme
-0.437	0.0111	Dock6	D	DOCK6	dedicator of cytokinesis 6	Cytoplasm	other
-0.437	0.0251	Cryab		CRYAB	crystallin, alpha B	Nucleus	other
-0.438	0.0208	Kctd1		KCTD1	potassium channel tetramerisation domain containing 1	Nucleus	transcription regulator
-0.438	0.032	Plagl1		PLAGL1	pleiomorphic adenoma gene-like 1	Nucleus	transcription regulator
-0.438	0.0374	Fzd3		FZD3	frizzled family receptor 3	Plasma Membrane	G-protein coupled receptor
-0.438	0.0454	Ppapdc1b		PPAPDC1B	phosphatidic acid phosphatase type 2 domain containing 1B	unknown	phosphatase
-0.439	0.0898	Mlkl		MLKL	mixed lineage kinase domain-like	unknown	kinase
-0.441	0.0711	Gm10099		Gm10099	predicted gene 10099	unknown	other
-0.443	0.0468	Cldn4		CLDN4	claudin 4	Plasma Membrane	transmembrane receptor
-0.444	0.0143	Ltbp3		LTBP3	latent transforming growth factor beta binding protein 3	Extracellular Space	other
-0.444	0.0384	Lrrc8c		LRRC8C	leucine rich repeat containing 8 family, member C	Cytoplasm	other
-0.445	0.0878	Agpat9		AGPAT9	1-acylglycerol-3-phosphate O-acyltransferase 9	Cytoplasm	enzyme
-0.447	0.0184	Tubb5		TUBB	tubulin, beta class I	Cytoplasm	other	brentuximab vedotin, cabazitaxel
-0.447	0.0259	Crip2		CRIP2	cysteine-rich protein 2	Plasma Membrane	other
-0.448	0.00749	Trp53i11		TP53I11	tumor protein p53 inducible protein 11	unknown	other
-0.448	0.014	Cpne2		NLRC5	NLR family, CARD domain containing 5	Cytoplasm	other
-0.448	0.0396	Smtn		SMTN	smoothelin	Extracellular Space	other
-0.448	0.0792	5330426P16Rik		5330426P16Rik	RIKEN cDNA 5330426P16 gene	unknown	other
-0.449	0.0879	Atp8b4		ATP8B4	ATPase, class I, type 8B, member 4	unknown	transporter
-0.45	0.0286	Zdhhc23		ZDHHC23	zinc finger, DHHC-type containing 23	unknown	other
-0.451	0.0124	Tmem184b		TMEM184B	transmembrane protein 184B	unknown	other
-0.451	0.0491	ENSMUST00000070916
-0.452	0.0132	Tmsb10	D	TMSB10/TMSB4X	thymosin beta 4, X-linked	Cytoplasm	other
-0.452	0.0866	Mapk10		MAPK10	mitogen-activated protein kinase 10	Cytoplasm	kinase
-0.452	0.0924	Myom1		MYOM1	myomesin 1, 185kDa	Cytoplasm	other
-0.453	0.0353	Rbms3		RBMS3	RNA binding motif, single stranded interacting protein 3	unknown	other
-0.453	0.0489	Serpinb6b		Serpinb6b	serine (or cysteine) peptidase inhibitor, clade B, member 6b	unknown	other
-0.454	0.00914	Lrrfip1		LRRFIP1	leucine rich repeat (in FLII) interacting protein 1	Cytoplasm	other
-0.454	0.0166	Dysf		DYSF	dysferlin, limb girdle muscular dystrophy 2B (autosomal recessive)	Plasma Membrane	other
-0.455	0.0215	Kif1a		Kif1a	kinesin family member 1A	Plasma Membrane	other
-0.455	0.0885	Mir181b-1		mir-181	microRNA 181a-2	Cytoplasm	microRNA
-0.456	0.0225	Dap		DAP	death-associated protein	Cytoplasm	transcription regulator
-0.457	0.062	Gm8165	D	CDV3	CDV3 homolog (mouse)	unknown	other
-0.458	0.0185	Kif26b	D	KIF26B	kinesin family member 26B	unknown	other
-0.458	0.088	Aebp1		AEBP1	AE binding protein 1	Nucleus	peptidase
-0.458	0.0926	Sytl5	D	SYTL5	synaptotagmin-like 5	unknown	other
-0.459	0.0288	Pkm2		PKM	pyruvate kinase, muscle	unknown	kinase
-0.461	0.0124	Anxa6		ANXA6	annexin A6	Plasma Membrane	other
-0.462	0.0184	Sirpa		SIRPA	signal-regulatory protein alpha	Plasma Membrane	phosphatase
-0.462	0.0309	Ttn		Ttn	titin	unknown	other
-0.463	0.00765	Tmsb10	D	TMSB10/TMSB4X	thymosin beta 4, X-linked	Cytoplasm	other
-0.463	0.0632	Krt7		KRT7	keratin 7	Cytoplasm	other
-0.464	0.0312	Maml2		MAML2	mastermind-like 2 (Drosophila)	Nucleus	transcription regulator
-0.464	0.0345	D330045A20Rik		CXorf57	chromosome X open reading frame 57	unknown	other
-0.467	0.0103	Ncam1		NCAM1	neural cell adhesion molecule 1	Plasma Membrane	other	BB-10901
-0.467	0.0159	Aqp2		AQP2	aquaporin 2 (collecting duct)	Plasma Membrane	transporter
-0.467	0.0472	Wipf1		WIPF1	WAS/WASL interacting protein family, member 1	Cytoplasm	other
-0.468	0.0864	Gdpd1		GDPD1	glycerophosphodiester phosphodiesterase domain containing 1	unknown	enzyme
-0.469	0.0116	Fam38a	D	PIEZO1	piezo-type mechanosensitive ion channel component 1	Cytoplasm	ion channel
-0.469	0.03	Slc44a3		SLC44A3	solute carrier family 44, member 3	Plasma Membrane	transporter
-0.469	0.0898	Arhgdib		ARHGDIB	Rho GDP dissociation inhibitor (GDI) beta	Cytoplasm	other
-0.47	0.041	Cmtm3		CMTM3	CKLF-like MARVEL transmembrane domain containing 3	Extracellular Space	cytokine
-0.47	0.094	Folr2		FOLR2	folate receptor 2 (fetal)	Plasma Membrane	transporter
-0.471	0.0119	Abcc1		ABCC1	ATP-binding cassette, sub-family C (CFTR/MRP), member 1	Plasma Membrane	transporter
-0.471	0.0491	Lgals3		LGALS3	lectin, galactoside-binding, soluble, 3	Extracellular Space	other
-0.472	0.0331	Tpm4	D	Tpm4	tropomyosin 4	Cytoplasm	other
-0.473	0.0308	Ifitm2	D	IFITM2	interferon induced transmembrane protein 2	Plasma Membrane	other
-0.473	0.0563	Sh3kbp1		SH3KBP1	SH3-domain kinase binding protein 1	Cytoplasm	other
-0.474	0.0463	Rgs5	D	RGS5	regulator of G-protein signaling 5	Plasma Membrane	other
-0.476	0.0226	Fstl3		FSTL3	follistatin-like 3 (secreted glycoprotein)	Extracellular Space	other
-0.476	0.052	Fdps		FDPS	farnesyl diphosphate synthase	Cytoplasm	enzyme	YM 529, alendronic acid, pamidronic acid
-0.477	0.0115	Fndc3b		FNDC3B	fibronectin type III domain containing 3B	Cytoplasm	other
-0.477	0.0159	Dock6	D	DOCK6	dedicator of cytokinesis 6	Cytoplasm	other
-0.477	0.0751	Pknox2		PKNOX2	PBX/knotted 1 homeobox 2	Nucleus	other
-0.477	0.0855	Cmklr1		CMKLR1	chemokine-like receptor 1	Plasma Membrane	G-protein coupled receptor
-0.478	0.00862	Hip1		HIP1 (includes EG:192154)	huntingtin interacting protein 1	Cytoplasm	other
-0.478	0.0169	Mmp14		MMP14	matrix metallopeptidase 14 (membrane-inserted)	Extracellular Space	peptidase
-0.478	0.0265	Gpr97		GPR97	G protein-coupled receptor 97	Plasma Membrane	G-protein coupled receptor
-0.48	0.0339	Kirrel		KIRREL	kin of IRRE like (Drosophila)	Plasma Membrane	other
-0.48	0.0601	Pid1		PID1	phosphotyrosine interaction domain containing 1	Cytoplasm	other
-0.482	0.0426	Hn1l		HN1L	hematological and neurological expressed 1-like	Cytoplasm	other
-0.484	0.0397	Bgn		BGN	biglycan	Extracellular Space	other
-0.485	0.00862	Fam65a		FAM65A	family with sequence similarity 65, member A	Cytoplasm	other
-0.485	0.0532	Mmp3		MMP3	matrix metallopeptidase 3 (stromelysin 1, progelatinase)	Extracellular Space	peptidase
-0.485	0.07	Cdc42ep1		CDC42EP1	CDC42 effector protein (Rho GTPase binding) 1	Extracellular Space	other
-0.486	0.023	Itga3		ITGA3	integrin, alpha 3 (antigen CD49C, alpha 3 subunit of VLA-3 receptor)	Plasma Membrane	other
-0.486	0.0287	Fndc1		FNDC1	fibronectin type III domain containing 1	Plasma Membrane	other
-0.486	0.0477	Tspan7		TSPAN7	tetraspanin 7	Plasma Membrane	other
-0.486	0.0866	Etnk1		ETNK1 (includes EG:312828)	ethanolamine kinase 1	Cytoplasm	kinase
-0.487	0.0709	Sepw1		SEPW1	selenoprotein W, 1	Cytoplasm	enzyme
-0.488	0.00471	Arpc1b	D	ARPC1B	actin related protein 2/3 complex, subunit 1B, 41kDa	Cytoplasm	other
-0.488	0.0473	Ophn1		OPHN1	oligophrenin 1	Cytoplasm	other
-0.488	0.0615	Btc		BTC	betacellulin	Extracellular Space	growth factor
-0.49	0.0247	Rgs5	D	RGS5	regulator of G-protein signaling 5	Plasma Membrane	other
-0.491	0.0444	Gpr126		GPR126	G protein-coupled receptor 126	Plasma Membrane	G-protein coupled receptor
-0.492	0.0104	Mt1		MT1E	metallothionein 1E	Cytoplasm	other
-0.492	0.0119	Rbpms		RBPMS	RNA binding protein with multiple splicing	unknown	transcription regulator
-0.493	0.0143	Gpr116		GPR116	G protein-coupled receptor 116	Plasma Membrane	G-protein coupled receptor
-0.495	0.0135	Utrn		UTRN	utrophin	Plasma Membrane	transmembrane receptor
-0.496	0.0189	Cd93		CD93	CD93 molecule	Plasma Membrane	other
-0.499	0.0445	Ifitm2	D	IFITM2	interferon induced transmembrane protein 2	Plasma Membrane	other
-0.502	0.0285	Sntb1		SNTB1	syntrophin, beta 1 (dystrophin-associated protein A1, 59kDa, basic component 1)	Plasma Membrane	other
-0.504	0.0737	Rps6ka1		RPS6KA1	ribosomal protein S6 kinase, 90kDa, polypeptide 1	Cytoplasm	kinase
-0.506	0.00682	Sort1		SORT1	sortilin 1	Plasma Membrane	transmembrane receptor
-0.506	0.0806	Svopl		SVOPL	SVOP-like	unknown	other
-0.509	0.0869	Xdh		XDH	xanthine dehydrogenase	Cytoplasm	enzyme	allopurinol, febuxostat
-0.51	0.032	Myo1d	D	MYO1D	myosin ID	Plasma Membrane	other
-0.51	0.0606	Arhgap11a		ARHGAP11A	Rho GTPase activating protein 11A	Cytoplasm	other
-0.513	0.0143	Fam38a	D	PIEZO1	piezo-type mechanosensitive ion channel component 1	Cytoplasm	ion channel
-0.515	0.0375	Ston1		STON1	stonin 1	Plasma Membrane	other
-0.515	0.0501	Tpm1		Tpm1	tropomyosin 1, alpha	Plasma Membrane	other
-0.516	0.058	Igsf10		IGSF10	immunoglobulin superfamily, member 10	unknown	other
-0.517	0.00954	Nupr1		NUPR1	nuclear protein, transcriptional regulator, 1	Nucleus	transcription regulator
-0.517	0.0884	Pcolce2		PCOLCE2 (includes EG:26577)	procollagen C-endopeptidase enhancer 2	Extracellular Space	other
-0.518	0.0342	Glp1r		GLP1R	glucagon-like peptide 1 receptor	Plasma Membrane	G-protein coupled receptor	liraglutide, T-0632, GLP-1 (7-36) amide, exenatide
-0.52	0.00952	Psd3	D	PSD3	pleckstrin and Sec7 domain containing 3	Cytoplasm	other
-0.52	0.0359	Tmem20		SLC35G1	solute carrier family 35, member G1	Plasma Membrane	other
-0.52	0.0445	B4galt6		B4GALT6	UDP-Gal:betaGlcNAc beta 1,4- galactosyltransferase, polypeptide 6	Cytoplasm	enzyme
-0.52	0.0645	Ttc28	D	TTC28	tetratricopeptide repeat domain 28	unknown	other
-0.521	0.0161	Slc7a6		SLC7A6	solute carrier family 7 (amino acid transporter light chain, y+L system), member 6	Plasma Membrane	transporter
-0.521	0.044	Adora1		ADORA1	adenosine A1 receptor	Plasma Membrane	G-protein coupled receptor	adenosine, dyphylline, aminophylline, clofarabine, theophylline, caffeine, tecadenoson
-0.522	0.0682	GENSCAN00000010976
-0.523	0.0457	Il17re		IL17RE	interleukin 17 receptor E	unknown	other
-0.524	0.0238	Cited2		CITED2	Cbp/p300-interacting transactivator, with Glu/Asp-rich carboxy-terminal domain, 2	Nucleus	transcription regulator
-0.524	0.0819	ENSMUST00000122673
-0.527	0.0397	Heg1	D	HEG1	HEG homolog 1 (zebrafish)	Plasma Membrane	other
-0.528	0.00862	Tmbim1		TMBIM1	transmembrane BAX inhibitor motif containing 1	Cytoplasm	other
-0.528	0.0523	Pdlim1	D	PDLIM1	PDZ and LIM domain 1	Cytoplasm	transcription regulator
-0.529	0.00502	Fry		FRY	furry homolog (Drosophila)	Extracellular Space	other
-0.529	0.0976	Gm11711		Cd300lh (includes others)	CD300 antigen like family member H	Plasma Membrane	other
-0.531	0.00765	Srgap1		SRGAP1	SLIT-ROBO Rho GTPase activating protein 1	Cytoplasm	other
-0.531	0.00914	Tuba1a		TUBA1A	tubulin, alpha 1a	Cytoplasm	other	epothilone B, ixabepilone, colchicine/probenecid, XRP9881, eribulin, AL 108, EC145, NPI-2358, milataxel, TPI 287, TTI-237, docetaxel, vinflunine, vinorelbine, vincristine, vinblastine, paclitaxel, podophyllotoxin, colchicine
-0.532	0.0444	Megf9		MEGF9	multiple EGF-like-domains 9	unknown	other
-0.534	0.0469	Airn		Airn	antisense Igf2r RNA	unknown	other
-0.534	0.0583	Heg1	D	HEG1	HEG homolog 1 (zebrafish)	Plasma Membrane	other
-0.535	0.055	Prss23		PRSS23	protease, serine, 23	Extracellular Space	peptidase
-0.536	0.0171	Nes		NES	nestin	Cytoplasm	other
-0.538	0.00962	Gata3		GATA3	GATA binding protein 3	Nucleus	transcription regulator
-0.54	0.0544	Tgfb2		TGFB2	transforming growth factor, beta 2	Extracellular Space	growth factor	AP-12009
-0.54	0.0694	Dsg2		DSG2	desmoglein 2	Plasma Membrane	other
-0.54	0.0773	Sdf2l1		SDF2L1	stromal cell-derived factor 2-like 1	Cytoplasm	other
-0.541	0.0835	Tmem45a		TMEM45A	transmembrane protein 45A	Plasma Membrane	other
-0.541	0.0928	Tmem47		TMEM47	transmembrane protein 47	Plasma Membrane	other
-0.542	0.006	Dock6	D	DOCK6	dedicator of cytokinesis 6	Cytoplasm	other
-0.542	0.0829	Msrb3		MSRB3	methionine sulfoxide reductase B3	Cytoplasm	enzyme
-0.544	0.0342	Parm1		PARM1	prostate androgen-regulated mucin-like protein 1	Extracellular Space	other
-0.545	0.00457	Sorbs2		SORBS2	sorbin and SH3 domain containing 2	Plasma Membrane	other
-0.545	0.0829	Mmrn1		MMRN1	multimerin 1	Extracellular Space	other
-0.546	0.0967	Myo9a		MYO9A	myosin IXA	Cytoplasm	enzyme
-0.548	0.0472	Mt2		MT1H	metallothionein 1H	unknown	other
-0.55	0.0188	Dock6	D	DOCK6	dedicator of cytokinesis 6	Cytoplasm	other
-0.551	0.0102	Itga8		ITGA8	integrin, alpha 8	Plasma Membrane	other
-0.552	0.0106	Il1r1		IL1R1	interleukin 1 receptor, type I	Plasma Membrane	transmembrane receptor	anakinra
-0.552	0.0856	Il6ra		IL6R	interleukin 6 receptor	Plasma Membrane	transmembrane receptor	tocilizumab
-0.553	0.0169	Fstl1		FSTL1	follistatin-like 1	Extracellular Space	other
-0.554	0.0124	Gpr39		GPR39	G protein-coupled receptor 39	Plasma Membrane	G-protein coupled receptor
-0.555	0.0122	Tpm4	D	Tpm4	tropomyosin 4	Cytoplasm	other
-0.555	0.0174	Dock6	D	DOCK6	dedicator of cytokinesis 6	Cytoplasm	other
-0.555	0.0373	Raph1		Raph1	Ras association (RalGDS/AF-6) and pleckstrin homology domains 1	Plasma Membrane	other
-0.556	0.0885	Ctsc		CTSC	cathepsin C	Cytoplasm	peptidase
-0.558	0.0496	Actn1		ACTN1	actinin, alpha 1	Cytoplasm	other
-0.558	0.052	Pla2g7		PLA2G7	phospholipase A2, group VII (platelet-activating factor acetylhydrolase, plasma)	Extracellular Space	enzyme	darapladib
-0.56	0.0784	Scg5		Scg5	secretogranin V	Cytoplasm	other
-0.561	0.0157	Dlc1		Dlc1	deleted in liver cancer 1	Cytoplasm	other
-0.562	0.0232	Fxyd5		FXYD5	FXYD domain containing ion transport regulator 5	Plasma Membrane	ion channel
-0.567	0.0515	Plbd1		PLBD1	phospholipase B domain containing 1	Extracellular Space	other
-0.567	0.0881	Phxr4		Phxr4	per-hexamer repeat gene 4	Plasma Membrane	other
-0.568	0.0373	Ifitm2	D	IFITM2	interferon induced transmembrane protein 2	Plasma Membrane	other
-0.568	0.0598	Emp1		EMP1	epithelial membrane protein 1	Plasma Membrane	other
-0.569	0.00749	Ampd3		AMPD3	adenosine monophosphate deaminase 3	Cytoplasm	enzyme
-0.574	0.0104	Zfhx3		ZFHX3	zinc finger homeobox 3	Nucleus	transcription regulator
-0.575	0.041	Golm1		GOLM1	golgi membrane protein 1	Cytoplasm	other
-0.575	0.0761	Cyyr1		CYYR1	cysteine/tyrosine-rich 1	unknown	other
-0.579	0.0345	Tspan1		TSPAN1	tetraspanin 1	unknown	other
-0.583	0.0489	Acacb		ACACB	acetyl-CoA carboxylase beta	Cytoplasm	enzyme
-0.587	0.0175	Mfap4		MFAP4	microfibrillar-associated protein 4	Extracellular Space	other
-0.589	0.00862	Efemp1		EFEMP1	EGF containing fibulin-like extracellular matrix protein 1	Extracellular Space	enzyme
-0.589	0.0822	Tubb2b	D	TUBB2B	tubulin, beta 2B class IIb	Cytoplasm	other	brentuximab vedotin, cabazitaxel
-0.591	0.0161	Csrp1		CSRP1	cysteine and glycine-rich protein 1	Nucleus	other
-0.598	0.0961	Sytl5	D	SYTL5	synaptotagmin-like 5	unknown	other
-0.604	0.0415	Pdlim1	D	PDLIM1	PDZ and LIM domain 1	Cytoplasm	transcription regulator
-0.607	0.0822	Scnn1g		SCNN1G	sodium channel, non-voltage-gated 1, gamma subunit	Plasma Membrane	ion channel
-0.609	0.0296	Psd3	D	PSD3	pleckstrin and Sec7 domain containing 3	Cytoplasm	other
-0.611	0.0548	Pfkfb3		PFKFB3	6-phosphofructo-2-kinase/fructose-2,6-biphosphatase 3	Cytoplasm	kinase
-0.614	0.0633	Clu		CLU	clusterin	Extracellular Space	other
-0.615	0.0506	Mtap1b		MAP1B	microtubule-associated protein 1B	Cytoplasm	other
-0.616	0.0262	1600029D21Rik		1600029D21Rik	RIKEN cDNA 1600029D21 gene	Plasma Membrane	other
-0.616	0.0271	Stab1		STAB1	stabilin 1	Plasma Membrane	transporter
-0.616	0.0462	Sytl2		Sytl2	synaptotagmin-like 2	Cytoplasm	other
-0.617	0.0351	Sec14l1		SEC14L1	SEC14-like 1 (S, cerevisiae)	Cytoplasm	transporter
-0.621	0.053	Aldh1a1		ALDH1A1	aldehyde dehydrogenase 1 family, member A1	Cytoplasm	enzyme	disulfiram, chlorpropamide
-0.624	0.0354	Flrt2		FLRT2	fibronectin leucine rich transmembrane protein 2	Plasma Membrane	other
-0.628	0.0563	Smoc2		SMOC2	SPARC related modular calcium binding 2	Extracellular Space	other
-0.63	0.0708	Gm10484		Gm10484	predicted gene 10484	unknown	other
-0.631	0.0864	Gm5114		Gm2128 (includes others)	predicted gene 5592	unknown	other
-0.633	0.0128	Pcolce		PCOLCE	procollagen C-endopeptidase enhancer	Extracellular Space	other
-0.638	0.0232	Cald1		Cald1	caldesmon 1	Plasma Membrane	other
-0.638	0.029	Mll2		MLL2	myeloid/lymphoid or mixed-lineage leukemia 2	Nucleus	transcription regulator
-0.638	0.0989	Car15		Car15	carbonic anhydrase 15	Extracellular Space	enzyme
-0.639	0.0238	Vgll3		VGLL3	vestigial like 3 (Drosophila)	unknown	other
-0.64	0.0117	Stc2		STC2	stanniocalcin 2	Extracellular Space	other
-0.64	0.0396	Ifitm3		Ifitm3	interferon induced transmembrane protein 3	Cytoplasm	other
-0.641	0.006	Ucp2		UCP2	uncoupling protein 2 (mitochondrial, proton carrier)	Cytoplasm	transporter
-0.643	0.00954	Plce1		PLCE1	phospholipase C, epsilon 1	Cytoplasm	enzyme
-0.648	0.053	Fbln1		FBLN1	fibulin 1	Extracellular Space	other
-0.649	0.0353	Padi2		PADI2	peptidyl arginine deiminase, type II	Cytoplasm	enzyme
-0.664	0.0165	Ephx1		EPHX1	epoxide hydrolase 1, microsomal (xenobiotic)	Cytoplasm	peptidase
-0.664	0.0783	Lrp1		LRP1 (includes EG:16971)	low density lipoprotein receptor-related protein 1	Plasma Membrane	transmembrane receptor
-0.666	0.0489	Spp1		SPP1 (includes EG:100359743)	secreted phosphoprotein 1	Extracellular Space	cytokine
-0.67	0.0167	Abcb1a		ABCB1	ATP-binding cassette, sub-family B (MDR/TAP), member 1	Plasma Membrane	transporter	dofequidar, XR9576, OC 144-093, valspodar
-0.671	0.053	1700025G04Rik		C1orf21	chromosome 1 open reading frame 21	unknown	other
-0.68	0.0449	D17H6S56E-5
-0.681	0.0446	Rnf144b		RNF144B	ring finger protein 144B	unknown	enzyme
-0.685	0.0649	Ehd2		EHD2	EH-domain containing 2	Nucleus	other
-0.686	0.0649	Olfr1316		OR4F16 (includes others)	olfactory receptor, family 4, subfamily F, member 16	Plasma Membrane	G-protein coupled receptor
-0.69	0.014	Aldh1a2		ALDH1A2	aldehyde dehydrogenase 1 family, member A2	Cytoplasm	enzyme
-0.69	0.014	Kif23		KIF23	kinesin family member 23	Cytoplasm	other
-0.692	0.032	Pgm5		PGM5	phosphoglucomutase 5	Cytoplasm	enzyme
-0.703	0.0313	Masp1		Masp1	mannan-binding lectin serine peptidase 1	Extracellular Space	peptidase
-0.703	0.0926	Slc8a1		SLC8A1	solute carrier family 8 (sodium/calcium exchanger), member 1	Plasma Membrane	transporter
-0.712	0.0927	Vim		VIM	vimentin	Cytoplasm	other
-0.723	0.0641	Ncrna00085		LINC00085	long intergenic non-protein coding RNA 85	unknown	other
-0.725	0.00254	Wnk1	D	Wnk1	WNK lysine deficient protein kinase 1	Cytoplasm	kinase
-0.729	0.014	Spon1		SPON1	spondin 1, extracellular matrix protein	Extracellular Space	other
-0.729	0.0193	Slc7a2		SLC7A2	solute carrier family 7 (cationic amino acid transporter, y+ system), member 2	Plasma Membrane	transporter
-0.733	0.00717	Spink8		SPINK8	serine peptidase inhibitor, Kazal type 8 (putative)	unknown	other
-0.736	0.00749	Hspg2		Hspg2	heparan sulfate proteoglycan 2	Extracellular Space	other
-0.738	0.0127	Tubb2a		TUBB2A	tubulin, beta 2A class IIa	Cytoplasm	other	epothilone B, ixabepilone, colchicine/probenecid, XRP9881, ABT-751, eribulin, MST-997, AL 108, EC145, NPI-2358, milataxel, TPI 287, TTI-237, brentuximab vedotin, cabazitaxel, BMS-275183, docetaxel, vinflunine, vinorelbine, vincristine, vinblastine, paclit
-0.742	0.00717	Cdh11		CDH11	cadherin 11, type 2, OB-cadherin (osteoblast)	Plasma Membrane	other
-0.742	0.0408	Atp2b4		ATP2B4	ATPase, Ca++ transporting, plasma membrane 4	Plasma Membrane	transporter
-0.746	0.0306	Tgfb3		TGFB3	transforming growth factor, beta 3	Extracellular Space	growth factor
-0.75	0.0598	Ccnd2		CCND2	cyclin D2	Nucleus	other
-0.751	0.034	Vcan		VCAN	versican	Extracellular Space	other
-0.753	0.00457	Nphs2		NPHS2	nephrosis 2, idiopathic, steroid-resistant (podocin)	Plasma Membrane	other
-0.772	0.0363	Myadm		MYADM	myeloid-associated differentiation marker	Nucleus	other
-0.775	0.0215	Flna		FLNA	filamin A, alpha	Cytoplasm	other
-0.783	0.0261	Tubb2b	D	TUBB2B	tubulin, beta 2B class IIb	Cytoplasm	other	brentuximab vedotin, cabazitaxel
-0.789	0.0917	Tagln		TAGLN	transgelin	Cytoplasm	other
-0.79	0.0749	Hspb1	D	HSPB1	heat shock 27kDa protein 1	Cytoplasm	other
-0.791	0.026	Gbp3		GBP4	guanylate binding protein 4	Cytoplasm	enzyme
-0.791	0.0468	Akap12		AKAP12	A kinase (PRKA) anchor protein 12	Cytoplasm	transporter
-0.794	0.0714	Hspb1	D	HSPB1	heat shock 27kDa protein 1	Cytoplasm	other
-0.798	0.0457	Sparcl1		SPARCL1	SPARC-like 1 (hevin)	Extracellular Space	other
-0.801	0.0919	Pde10a		PDE10A	phosphodiesterase 10A	Cytoplasm	enzyme
-0.802	0.0207	Tnc		TNC (includes EG:116640)	tenascin C	Extracellular Space	other
-0.807	0.00677	Apoe		APOE	apolipoprotein E	Extracellular Space	transporter
-0.821	0.0553	Mgst1		MGST1	microsomal glutathione S-transferase 1	Cytoplasm	enzyme
-0.823	0.0927	Krt19		KRT19 (includes EG:16669)	keratin 19	Cytoplasm	other
-0.825	0.0106	Krt18		KRT18	keratin 18	Cytoplasm	other
-0.846	0.0225	Mmd		MMD	monocyte to macrophage differentiation-associated	Plasma Membrane	other
-0.847	0.0464	Maob		MAOB	monoamine oxidase B	Cytoplasm	enzyme	safinamide, ladostigil, rasagiline, selegiline, dextroamphetamine, procainamide, tranylcypromine, phenelzine, isocarboxazid, benzphetamine
-0.861	0.00765	Pappa		PAPPA	pregnancy-associated plasma protein A, pappalysin 1	Extracellular Space	peptidase
-0.862	0.012	Sparc		SPARC	secreted protein, acidic, cysteine-rich (osteonectin)	Extracellular Space	other
-0.885	0.012	Fbn1		FBN1	fibrillin 1	Extracellular Space	other
-0.89	0.0457	Lyplal1		LYPLAL1	lysophospholipase-like 1	Cytoplasm	enzyme
-0.907	0.0621	Wfdc2		WFDC2	WAP four-disulfide core domain 2	Extracellular Space	other
-0.913	0.004	Thbs1		THBS1	thrombospondin 1	Extracellular Space	other
-0.922	0.0225	Mgll		MGLL	monoglyceride lipase	Plasma Membrane	enzyme
-0.922	0.0866	Acta2		ACTA2	actin, alpha 2, smooth muscle, aorta	Cytoplasm	other
-0.929	0.00258	Myof		MYOF	myoferlin	Nucleus	other
-0.933	0.012	Tacstd2		TACSTD2	tumor-associated calcium signal transducer 2	Plasma Membrane	other
-0.947	0.0424	Acsf2	D	ACSF2	acyl-CoA synthetase family member 2	Cytoplasm	enzyme
-0.955	0.0165	Grem2		GREM2	gremlin 2	Extracellular Space	other
-0.956	0.00254	Antxr1		ANTXR1	anthrax toxin receptor 1	Plasma Membrane	transmembrane receptor
-0.972	0.0749	Mmp2		MMP2	matrix metallopeptidase 2 (gelatinase A, 72kDa gelatinase, 72kDa type IV collagenase)	Extracellular Space	peptidase
-0.986	0.0332	Acsf2	D	ACSF2	acyl-CoA synthetase family member 2	Cytoplasm	enzyme
-0.998	0.00254	Cp		CP	ceruloplasmin (ferroxidase)	Extracellular Space	enzyme
-1.021	0.00954	Fam129a		FAM129A	family with sequence similarity 129, member A	Cytoplasm	other
-1.076	0.0429	Zbtb16		ZBTB16	zinc finger and BTB domain containing 16	Nucleus	transcription regulator
-1.087	0.0395	Abcc4		ABCC4 (includes EG:10257)	ATP-binding cassette, sub-family C (CFTR/MRP), member 4	Plasma Membrane	transporter
-1.094	0.0783	Upk1b		UPK1B	uroplakin 1B	Plasma Membrane	other
-1.1	0.049	Lox		LOX	lysyl oxidase	Extracellular Space	enzyme
-1.141	0.0257	Cdh6		CDH6	cadherin 6, type 2, K-cadherin (fetal kidney)	Plasma Membrane	other
-1.166	0.0639	Col12a1		COL12A1	collagen, type XII, alpha 1	Extracellular Space	other	collagenase clostridium histolyticum
-1.213	0.0217	Grem1		GREM1	gremlin 1	Extracellular Space	other
-1.292	0.00711	Fn1		FN1 (includes EG:100005469)	fibronectin 1	Extracellular Space	enzyme
-1.297	0.0749	Kynu		KYNU	kynureninase	Cytoplasm	enzyme
-1.484	0.0159	Trf		TF	transferrin	Extracellular Space	transporter
-1.491	0.0933	Sprr1a		Sprr1a	small proline-rich protein 1A	Cytoplasm	other
-1.495	0.0173	Elovl6		ELOVL6	ELOVL fatty acid elongase 6	Cytoplasm	enzyme
-1.551	0.0388	C3		NAD+		unknown	chemical - endogenous mammalian
-1.599	0.0127	Lcn2		LCN2	lipocalin 2	Extracellular Space	transporter
-1.634	0.0275	Gc		GC	group-specific component (vitamin D binding protein)	Extracellular Space	transporter
-1.692	0.0054	Nr1d1		NR1D1	nuclear receptor subfamily 1, group D, member 1	Nucleus	ligand-dependent nuclear receptor
-1.699	0.0445	Abcb1b		Abcb1b	ATP-binding cassette, sub-family B (MDR/TAP), member 1B	Plasma Membrane	transporter
-1.752	0.00684	Scd1		SCD	stearoyl-CoA desaturase (delta-9-desaturase)	Cytoplasm	enzyme
-2.484	0.0405	Prlr	D	PRLR	prolactin receptor	Plasma Membrane	transmembrane receptor
-2.854	0.0248	Prlr	D	PRLR	prolactin receptor	Plasma Membrane	transmembrane receptor
-3.306	0.0359	Slc7a12		Slc7a12	solute carrier family 7 (cationic amino acid transporter, y+ system), member 12	Plasma Membrane	transporter

## Sheet: Upregualted GO KEGG
Category	Term	Count	%	PValue	Genes	List Total	Pop Hits	Pop Total	Fold Enrichment	Bonferroni	Benjamini	FDR
KEGG_PATHWAY	mmu01100:Metabolic pathways	153	1.98444e+16	1.13042e-52	DGKG, CDA, GALNT14, ACSM2, PANK1, XYLT1, CPOX, NUDT2, SAT2, CNDP1, CNDP2, C1GALT1C1, NAGLU, FPGT, CHAC2, CAR9, MLYCD, ENPP3, HADH, GGT1, ENPP6, SEPHS2, ENTPD4, MCCC1, ACOT12, TALDO1, PIPOX, ACYP2, CMBL, PISD, ALDH3A2, SUCLG1, LAP3, IDO2, DGKH, CYP4A12A, CYP4A12B, FECH, SHMT2, AK2, AK4, GLYAT, ADH5, ACAT1, HSD11B1, NEU2, INPP5B, PTDSS1, FUT8, AMDHD2, LDHD, NEU1, AFMID, PNPO, HYI, ASL, KDSR, B4GALN…	342	1624	17870	4922705470572985	3.39127e-50	3.39127e-50	2.87128e-50
KEGG_PATHWAY	mmu01240:Biosynthesis of cofactors	25	324254215304799	16.4969	FECH, SHMT2, PANK1, HAAO, QPRT, AK2, CPOX, AK4, NFS1, AFMID, ASPDH, PNPO, GUSB, VKORC1, TPK1, GSS, UGT2B38, UGT2B37, NME2, COASY, ALDH3A2, DHFR, RGN, UGT2B5, IDO2	342	153	17870	8537820586324198	499.6	2474.54	2095.11
KEGG_PATHWAY	mmu04146:Peroxisome	18	2.33463e+16	584.486	PECR, PHYH, PEX11A, EPHX2, PIPOX, CROT, PEX1, DHRS4, SOD1, GNPAT, PRDX5, AMACR, ACOX1, AGPS, NUDT19, ACOX3, MLYCD, SLC27A2	342	87	17870	1.08106e+16	1.7536e+06	58448.6	49486.5
KEGG_PATHWAY	mmu00983:Drug metabolism - other enzymes	14	1.81582e+16	2.65613e+08	CDA, TPMT, UGT2B38, UGT2B37, NME2, CES2B, CES2C, NAT2, CES1E, CES2F, CES1F, UGT2B5, TK1, GUSB	342	94	17870	7782132636555928	7.96836e+09	1.9921e+10	1.68664e+09
KEGG_PATHWAY	mmu00410:beta-Alanine metabolism	9	1.16732e+16	1.90777e+09	ALDH3A2, ALDH6A1, ACOX1, MLYCD, ACOX3, CSAD, ACADS, CNDP1, CNDP2	342	34	17870	138312693498452	5.72314e+11	1.14466e+11	9.69146e+09
KEGG_PATHWAY	mmu01200:Carbon metabolism	14	1.81582e+16	7.23754e+08	ACSS2, SHMT2, GLYCTK, TALDO1, ADH5, ACAT1, ALDH6A1, PCCA, ACOX1, RGN, ME1, SUCLG1, ACOX3, ACADS	342	124	17870	589935861158272	2.17103e+12	2.82691e+11	2.39345e+11
KEGG_PATHWAY	mmu00650:Butanoate metabolism	8	1.03761e+16	7.26534e+08	ALDH5A1, BDH2, BDH1, ACSM2, HADH, ACADS, AACS, ACAT1	342	28	17870	1.4929e+16	2.17936e+12	2.82691e+11	2.39345e+11
KEGG_PATHWAY	mmu00071:Fatty acid degradation	10	1297016861219196	7.53842e+08	ALDH3A2, CYP4A12A, CPT1A, CYP4A12B, ACOX1, ACOX3, HADH, ACADS, ADH5, ACAT1	342	54	17870	9676196664500758	2.26127e+11	2.82691e+11	2.39345e+11
KEGG_PATHWAY	mmu00280:Valine, leucine and isoleucine degradation	10	1297016861219196	1.21273e+10	ACAD8, ALDH3A2, ALDH6A1, PCCA, IVD, MCCC1, HADH, ACADS, AACS, ACAT1	342	57	17870	9166923155842824	3.63752e+10	4.04243e+10	3.42259e+11
KEGG_PATHWAY	mmu00640:Propanoate metabolism	8	1.03761e+16	1.53599e+10	ALDH6A1, ACSS2, PCCA, ACOX1, SUCLG1, MLYCD, ACOX3, ACADS	342	31	17870	1.34842e+16	4.60692e+11	4.60798e+11	3.90142e+11
KEGG_PATHWAY	mmu04142:Lysosome	14	1.81582e+16	2.65703e+10	ENTPD4, HEXB, FUCA1, FUCA2, SLC11A2, GALNS, NAGLU, GLB1, NEU1, AP1S1, ARSG, PPT2, GUSB, ARSB	342	139	17870	526273717867811	7.96793e+11	7.24645e+09	6.13533e+10
KEGG_PATHWAY	mmu00511:Other glycan degradation	6	7782101167315175	1.71599e+11	NEU2, GLB1, FUCA1, HEXB, FUCA2, NEU1	342	18	17870	1.74172e+16	5.13477e+16	4.17464e+11	3.53453e+11
KEGG_PATHWAY	mmu00620:Pyruvate metabolism	8	1.03761e+16	1.80901e+10	ALDH3A2, ACSS2, LDHD, ME1, ACOT12, ACYP2, ADH5, ACAT1	342	44	17870	950026581605529	5412378295888143	4.17464e+11	3.53453e+11
KEGG_PATHWAY	mmu00630:Glyoxylate and dicarboxylate metabolism	7	9079118028534372	2.75343e+11	ACSS2, PCCA, SHMT2, GLYCTK, AFMID, HYI, ACAT1	342	32	17870	1143000730994152	82263920366632	5.90022e+10	4.99552e+11
KEGG_PATHWAY	mmu05014:Amyotrophic lateral sclerosis	21	2.72374e+16	3.35685e+11	MAP2K3, GPX1, NDUFB6, NDUFA4, NDUFA1, SLC1A2, UQCR11, UQCR10, WIPI2, MAPK14, NXT2, MTOR, SOD1, PSMB6, PSMA5, PINK1, MAP1LC3A, PSMC6, PSMB1, NDUFS1, BID	342	372	17870	294967930579136	1.00202e+16	6.7137e+11	5.68427e+10
KEGG_PATHWAY	mmu00531:Glycosaminoglycan degradation	6	7782101167315175	4.95309e+10	GALNS, NAGLU, GLB1, HEXB, GUSB, ARSB	342	22	17870	1.42504e+16	1.47498e+16	9.28704e+11	7.86303e+10
KEGG_PATHWAY	mmu00380:Tryptophan metabolism	8	1.03761e+16	7.1004e+10	ALDH3A2, HAAO, AFMID, HADH, IDO2, INMT, DHTKD1, ACAT1	342	54	17870	7740957331600606	2.10767e+16	1.25301e+16	1.06088e+16
KEGG_PATHWAY	mmu00860:Porphyrin metabolism	7	9079118028534372	1.76921e+12	FECH, UGT2B38, UGT2B37, UGT2B5, CPOX, GUSB, BLVRA	342	44	17870	8312732589048379	5169688311064857	2948688253024993	2496556054227827
KEGG_PATHWAY	mmu01212:Fatty acid metabolism	8	1.03761e+16	1.9156e+12	CPT1A, ACOX1, PPT2, ACOX3, HADH, ACADS, MCAT, ACAT1	342	63	17870	6635106284229091	5585319381402365	3024637099586749	2.56086e+16
KEGG_PATHWAY	mmu05016:Huntington disease	17	2204928664072633	2.68422e+10	GPX1, NDUFB6, NDUFA4, NDUFA1, SLC1A2, UQCR11, UQCR10, WIPI2, MTOR, SOD1, PSMB6, PSMA5, PSMC6, PSMB1, TFAM, NDUFS1, POLR2K	342	305	17870	2.91238e+16	7737957092617276	3965425192866766	3357393329960528
KEGG_PATHWAY	mmu00053:Ascorbate and aldarate metabolism	6	7782101167315175	2.7758e+12	ALDH3A2, UGT2B38, UGT2B37, RGN, UGT2B5, GUSB	342	31	17870	1.01132e+16	799115651926684	3965425192866766	3357393329960528
KEGG_PATHWAY	mmu00730:Thiamine metabolism	5	648508430609598	3.22577e+12	NFS1, TPK1, AK2, AK4, ACP1	342	18	17870	1.45143e+16	9225224335939620	4.39878e+16	3724299179131425
KEGG_PATHWAY	mmu00600:Sphingolipid metabolism	7	9079118028534372	4.03564e+12	NEU2, SMPD2, SPTLC1, GLB1, NEU1, DEGS2, KDSR	342	51	17870	7171769292512326	1.14049e+16	526388191074053	4456753351093649
KEGG_PATHWAY	mmu04936:Alcoholic liver disease	11	1.42672e+16	4.49819e+12	ALDH3A2, MAP2K3, CPT1A, CHUK, ACOX1, MLYCD, FADD, ACOX3, MAPK14, ADIPOR1, ADH5	342	144	17870	3.99143e+16	1.26263e+16	5622737574585474	4760584479815702
KEGG_PATHWAY	mmu00770:Pantothenate and CoA biosynthesis	5	648508430609598	7.26045e+11	ALDH3A2, PANK1, ENPP3, CSAD, COASY	342	22	17870	1.18753e+16	1.95788e+16	8712536701145078	73766144069695
KEGG_PATHWAY	mmu05415:Diabetic cardiomyopathy	13	1.68612e+16	9.03436e+10	ACE, NDUFB6, NDUFA4, NDUFA1, UQCR11, UQCR10, MAPK14, PRKCZ, MTOR, GYS2, PDK3, NDUFS1, CD36	342	215	17870	3.15939e+16	2375003898255339	1.04243e+16	882587406870175
KEGG_PATHWAY	mmu03320:PPAR signaling pathway	8	1.03761e+16	1.89555e+16	CYP4A12A, CPT1A, CYP4A12B, ACOX1, ME1, CD36, ACOX3, SLC27A2	342	92	17870	4543605390287312	4.34025e+16	2106168987922737	1.78322e+16
KEGG_PATHWAY	mmu05020:Prion disease	14	1.81582e+16	2135942508420499	NDUFB6, NDUFA4, NDUFA1, UQCR11, UQCR10, MAPK14, SOD1, PSMB6, PSMA5, C8G, PSMC6, PSMB1, NDUFS1, NCAM2	342	270	17870	2.70934e+16	4734811081630077	2.28851e+16	1.9376e+16
KEGG_PATHWAY	mmu05022:Pathways of neurodegeneration - multiple diseases	20	2594033722438392	2.34291e+16	MAP2K3, GPX1, NDUFB6, NDUFA4, NDUFA1, UQCR11, UQCR10, WIPI2, MAPK14, MTOR, SOD1, PSMB6, PSMA5, PINK1, MAP1LC3A, PSMC6, PSMB1, NDUFS1, FADD, BID	342	481	17870	2172617962091646	5052477459422524	2423701603565109	2.05207e+16
KEGG_PATHWAY	mmu00604:Glycosphingolipid biosynthesis - ganglio series	4	5188067444876783	2642736496104138	ST8SIA1, GLB1, HEXB, SLC33A1	342	15	17870	1393372319688109	5479083736941865	2.6013e+16	2202432335205244
KEGG_PATHWAY	mmu00480:Glutathione metabolism	7	9079118028534372	2.68801e+16	GPX1, NAT8, GSS, ODC1, CHAC2, LAP3, GGT1	342	73	17870	5010414163262036	5540231100625645	2.6013e+16	2202432335205244
KEGG_PATHWAY	mmu00830:Retinol metabolism	8	1.03761e+16	2877337282038583	CYP4A12A, CYP4A12B, UGT2B38, UGT2B37, UGT2B5, RDH5, ADH5, DHRS4	342	99	17870	422234036269124	5787148810684308	2.6975e+16	2283886467618125
KEGG_PATHWAY	mmu04932:Non-alcoholic fatty liver disease	10	1297016861219196	3372704441379079	NDUFB6, NDUFA4, MLX, NDUFA1, UQCR11, NDUFS1, UQCR10, MAPK14, ADIPOR1, BID	342	158	17870	3307054556221778	6370613433449744	3.03792e+16	2.57211e+16
KEGG_PATHWAY	mmu00512:Mucin type O-glycan biosynthesis	5	648508430609598	3.44418e+16	GALNT14, C1GALT1C1, GALNT3, GALNT1, C1GALT1	342	33	17870	7916888180046074	6447864839949176	3.03792e+16	2.57211e+16
KEGG_PATHWAY	mmu00330:Arginine and proline metabolism	6	7782101167315175	3.61389e+16	ALDH3A2, ODC1, SAT2, LAP3, CNDP1, CNDP2	342	54	17870	5805717998700454	6624799000048498	3.03792e+16	2.57211e+16
KEGG_PATHWAY	mmu05010:Alzheimer disease	17	2204928664072633	3645506460676703	CHUK, NDUFB6, NDUFA4, SLC11A2, NDUFA1, UQCR11, UQCR10, WIPI2, MTOR, PSMB6, PSMA5, PSMC6, PSMB1, NDUFS1, FADD, NAE1, BID	342	391	17870	2271802695143656	6656778580128587	3.03792e+16	2.57211e+16
KEGG_PATHWAY	mmu00230:Purine metabolism	9	1.16732e+16	4031005617843312	ENTPD4, PDE4C, AK2, NME2, NUDT2, PGM2, AK4, PDE6A, ENPP3	342	133	17870	353581321725366	7023228015136633	326838293338647	2.76723e+16
KEGG_PATHWAY	mmu05208:Chemical carcinogenesis - reactive oxygen species	12	1556420233463035	4223054037208943	SLC26A1, CHUK, NDUFB6, NDUFA4, EPHX2, NDUFA1, UQCR11, NDUFS1, UQCR10, MAPK14, ACP1, SOD1	342	226	17870	2774413910883403	7190557124861998	3333990029375481	2.82278e+16
KEGG_PATHWAY	mmu00240:Pyrimidine metabolism	6	7782101167315175	4568128347453012	CDA, ENTPD4, NME2, NUDT2, ENPP3, TK1	342	57	17870	5500153893505694	7468006710982691	3.46899e+16	2937077628205053
KEGG_PATHWAY	mmu00040:Pentose and glucuronate interconversions	5	648508430609598	4740952077023904	UGT2B38, UGT2B37, SORD, UGT2B5, GUSB	342	36	17870	7257147498375567	75965209741705	3.46899e+16	2937077628205053
KEGG_PATHWAY	mmu03030:DNA replication	5	648508430609598	4740952077023904	POLE4, POLD3, PRIM2, RNASEH2B, MCM6	342	36	17870	7257147498375567	75965209741705	3.46899e+16	2937077628205053
KEGG_PATHWAY	mmu05012:Parkinson disease	13	1.68612e+16	5238646763615459	NDUFB6, NDUFA4, SLC11A2, NDUFA1, UQCR11, UQCR10, SOD1, PSMB6, PSMA5, PINK1, PSMC6, PSMB1, NDUFS1	342	266	17870	2.55364e+16	7931424683217209	3.74189e+16	3168133995138873
KEGG_PATHWAY	mmu04714:Thermogenesis	12	1556420233463035	5867564150050596	MAP2K3, CPT1A, NDUFB6, NDUFA4, NDUFA1, UQCR11, NDUFS1, NDUFAF1, UQCR10, MAPK14, SMARCA2, MTOR	342	236	17870	2656853999405293	8288908773272902	4.09365e+16	3465956497936863
KEGG_PATHWAY	mmu00260:Glycine, serine and threonine metabolism	5	648508430609598	6930409120314687	SHMT2, CBS, GLYCTK, PIPOX, BPGM	342	40	17870	6531432748538011	8758619197878479	4725278945669105	4000736173999842
KEGG_PATHWAY	mmu00590:Arachidonic acid metabolism	7	9079118028534372	7516476410155721	CYP4A12A, CYP4A12B, CYP2J5, GPX1, EPHX2, CYP2J9, GGT1	342	90	17870	4064002599090318	8960099692581126	5.01098e+16	4242633351510119
KEGG_PATHWAY	mmu00514:Other types of O-glycan biosynthesis	5	648508430609598	8950917994725605	GALNT14, C1GALT1C1, GALNT3, GALNT1, C1GALT1	342	43	17870	6075751393988848	9326171966680468	5.76608e+16	4881945537260899
KEGG_PATHWAY	mmu00310:Lysine degradation	6	7782101167315175	9033521269734736	ALDH3A2, PIPOX, HADH, AASS, DHTKD1, ACAT1	342	67	17870	467923540193768	934281267843255	5.76608e+16	4881945537260899
KEGG_PATHWAY	mmu00982:Drug metabolism - cytochrome P450	6	7782101167315175	1.1454e+16	UGT2B38, UGT2B37, UGT2B5, FMO2, FMO5, ADH5	342	71	17870	4415616506053867	968444980186549	7158733330784187	6061060886730612
KEGG_PATHWAY	mmu00564:Glycerophospholipid metabolism	7	9079118028534372	1.1744e+16	DGKG, GNPAT, LYPLA1, PTDSS1, ETNK2, PISD, DGKH	342	99	17870	3.69455e+16	9711037458032336	7190187259434425	608769187965448
KEGG_PATHWAY	mmu00980:Metabolism of xenobiotics by cytochrome P450	6	7782101167315175	1.35354e+16	HSD11B1, AKR7A5, UGT2B38, UGT2B37, UGT2B5, ADH5	342	74	17870	423660502607871	9832329464897188	8121216004537139	6875962883841445
KEGG_PATHWAY	mmu00520:Amino sugar and nucleotide sugar metabolism	5	648508430609598	1610283752229317	GNPDA2, AMDHD2, FPGT, HEXB, PGM2	342	51	17870	5122692351794519	9923279323261962	9472257366054808	8019844569926401
KEGG_PATHWAY	mmu01523:Antifolate resistance	4	5188067444876783	1.74364e+16	DHFR, CHUK, SHMT2, FOLR1	342	29	17870	7207098205283323	994892585780511	1.00595e+16	8517011846884431
KEGG_PATHWAY	mmu00920:Sulfur metabolism	3	3.89105e+16	1.7821e+16	SELENBP1, SELENBP2, SUOX	342	11	17870	1.42504e+16	9954585828681952	1.00874e+16	85406369638948
KEGG_PATHWAY	mmu04931:Insulin resistance	7	9079118028534372	2046208662291997	GYS2, CPT1A, MLX, CD36, PRKCZ, SLC27A2, MTOR	342	112	17870	3265716374269006	9979752329936348	1.13678e+16	9624759263373468
KEGG_PATHWAY	mmu00030:Pentose phosphate pathway	4	5188067444876783	287334653697073	GLYCTK, RGN, TALDO1, PGM2	342	35	17870	5.9716e+16	9998409522381478	1.56728e+16	1.32696e+16
KEGG_PATHWAY	mmu00561:Glycerolipid metabolism	5	648508430609598	3058358697063761	DGKG, ALDH3A2, MOGAT1, GLYCTK, DGKH	342	62	17870	4213827579701943	9999102342786554	1.62523e+16	1.37603e+16
KEGG_PATHWAY	mmu00500:Starch and sucrose metabolism	4	5188067444876783	3.09146e+16	GYS2, TREH, PGM2, ENPP3	342	36	17870	5805717998700454	9999189757912496	1.62523e+16	1.37603e+16
KEGG_PATHWAY	mmu00140:Steroid hormone biosynthesis	6	7782101167315175	3142112413706857	HSD11B1, CYP2D12, HSD3B3, UGT2B38, UGT2B37, UGT2B5	342	92	17870	3.4077e+16	9999307375369024	1.62523e+16	1.37603e+16
KEGG_PATHWAY	mmu00603:Glycosphingolipid biosynthesis - globo and isoglobo series	3	3.89105e+16	3652533374202695	ST8SIA1, HEXB, B3GALT5	342	16	17870	9797149122807016	9999858064862792	1.85722e+16	1.57245e+16
KEGG_PATHWAY	mmu00010:Glycolysis / Gluconeogenesis	5	648508430609598	3906394034589623	ALDH3A2, ACSS2, PGM2, BPGM, ADH5	342	67	17870	3.89936e+16	9999935679820378	1.9532e+16	1.65371e+16
KEGG_PATHWAY	mmu00513:Various types of N-glycan biosynthesis	4	5188067444876783	4047946056726988	MAN1A, FUT8, HEXB, B4GALNT3	342	40	17870	5225146198830409	9999958668354584	1.97823e+16	1674901906011669
KEGG_PATHWAY	mmu00450:Selenocompound metabolism	3	3.89105e+16	4088343235146594	SEPSECS, SEPHS2, INMT	342	17	17870	9220846233230134	9999963573461806	1.97823e+16	1674901906011669
KEGG_PATHWAY	mmu05231:Choline metabolism in cancer	6	7782101167315175	4262953095933572	DGKG, LYPLA1, SLC44A4, SLC22A2, MTOR, DGKH	342	100	17870	3.13509e+16	9999978913323092	2019274720214575	1.70965e+16
KEGG_PATHWAY	mmu04216:Ferroptosis	4	5188067444876783	4307786069791093	MAP1LC3A, GSS, SLC11A2, SAT2	342	41	17870	5097703608615033	9999981677667756	2019274720214575	1.70965e+16
KEGG_PATHWAY	mmu00760:Nicotinate and nicotinamide metabolism	4	5188067444876783	4575772580323137	QPRT, ASPDH, SIRT7, ENPP3	342	42	17870	4976329713171818	9999992100570256	2111895037072217	1.78807e+16
KEGG_PATHWAY	mmu03420:Nucleotide excision repair	4	5188067444876783	4851823638970415	POLE4, POLD3, XPA, GTF2H2	342	43	17870	4860601115191078	9999996687616104	2205374381350189	1.86722e+16
KEGG_PATHWAY	mmu04920:Adipocytokine signaling pathway	5	648508430609598	5.08392e+16	CPT1A, CHUK, CD36, ADIPOR1, MTOR	342	73	17870	3578867259472883	9999998407996136	2.27638e+16	1.92734e+16
KEGG_PATHWAY	mmu05017:Spinocerebellar ataxia	7	9079118028534372	5808511068221001	PSMB6, PSMA5, PSMC6, PSMB1, VLDLR, WIPI2, MTOR	342	144	17870	2.54e+16	9999999840228756	2562578412450442	2169649722541374
KEGG_PATHWAY	mmu03050:Proteasome	4	5188067444876783	6.03483e+16	PSMB6, PSMA5, PSMC6, PSMB1	342	47	17870	4446932935174816	9999999922363626	2623840979838589	2221518696263339
KEGG_PATHWAY	mmu01230:Biosynthesis of amino acids	5	648508430609598	7428940832516899	SHMT2, CBS, PAH, TALDO1, ASL	342	83	17870	3147678433030367	9999999999123868	3183831785364385	2695644244941846
KEGG_PATHWAY	mmu05169:Epstein-Barr virus infection	9	1.16732e+16	7896880639685885	MAP2K3, PSMC6, CHUK, SAP30L, H2-T9, FADD, MAPK14, BID, SAP30	342	233	17870	2.0183e+16	9999999999808440	333671012944474	282508124292988
KEGG_PATHWAY	mmu05204:Chemical carcinogenesis - DNA adducts	5	648508430609598	8222744685181013	HSD11B1, NAT2, UGT2B38, UGT2B37, UGT2B5	342	86	17870	3037875696994424	9999999999933852	3.42614e+16	2.9008e+16
KEGG_PATHWAY	mmu00340:Histidine metabolism	3	3.89105e+16	8742970861685859	ALDH3A2, CNDP1, CNDP2	342	26	17870	6029014844804318	9999999999987980	359300172398049	3042074792970148
KEGG_PATHWAY	mmu04071:Sphingolipid signaling pathway	6	7782101167315175	9376127891671600	SMPD2, SPTLC1, DEGS2, MAPK14, BID, PRKCZ	342	126	17870	2488164856585909	9999999999998512	3.80113e+16	3218292546600793
KEGG_PATHWAY	mmu04750:Inflammatory mediator regulation of TRP channels	6	7782101167315175	9860724369784056	MAP2K3, CYP4A12A, CYP4A12B, CYP2J5, CYP2J9, MAPK14	342	128	17870	2.44929e+16	9999999999999702	3944289747913623	3339498653233534

## Sheet: Metabloic pathway GO 
Category	Term	Count	%	PValue	Genes	List Total	Pop Hits	Pop Total	Fold Enrichment	Bonferroni	Benjamini	FDR
GOTERM_MF_DIRECT	GO:0016491~oxidoreductase activity	41	2.67974e+16	3.48708e-20	CYP4A12A, CYP4A12B, HAAO, CPOX, ADH5, DHTKD1, SELENBP1, HSD11B1, LDHD, ASPDH, ME1, PNPO, KDSR, HADH, ACADS, AASS, VKORC1, ACAD8, CYP2J5, GPX1, HSD3B3, SORD, PIPOX, SUOX, DHRS4, ALDH3A2, DHFR, ALDH6A1, BDH2, ALDH5A1, BDH1, ACOX1, IVD, PAH, AGPS, RDH5, NDUFS1, ACOX3, DEGS2, IDO2, BLVRA	150	628	36679	1.59643e+16	1.40878e-17	1.40878e-17	1.25186e-17
GOTERM_MF_DIRECT	GO:0003824~catalytic activity	26	1699346405228758	9.40976e-08	CDA, SHMT2, ODC1, QPRT, CSAD, GYS2, NFS1, SPTLC1, LDHD, ASL, ENPP3, ENPP6, ARSB, AASS, HSD3B3, EPHX2, TALDO1, BPGM, FAH, COASY, GALNS, SEPSECS, BDH1, PAH, AGPS, SUCLG1	150	389	36679	1.63437e+16	3.80154e-05	1.90077e-05	0.000168905
GOTERM_MF_DIRECT	GO:0016740~transferase activity	44	2875816993464052	4.94814e-07	DGKG, GALNT14, SHMT2, PANK1, MOGAT1, QPRT, AK2, XYLT1, SAT2, AK4, GLYAT, ACAT1, GYS2, PTDSS1, FUT8, NFS1, SPTLC1, FPGT, TK1, GGT1, B4GALNT3, SEPHS2, B3GALNT2, GALNT3, ST8SIA1, TPK1, GALNT1, GLYCTK, C1GALT1, NME2, TALDO1, B3GALT5, SIRT7, MCAT, INMT, COASY, SEPSECS, NAT8, NAT2, ETNK2, AGPS, PI4KA, UGT2B5, DGKH	150	1770	36679	607862900188324	0.00199905	6.6635e-05	5.92128e-05
GOTERM_MF_DIRECT	GO:0016787~hydrolase activity	37	2418300653594771	0.48242	CDA, MTMR14, HEXB, TREH, NUDT2, CNDP1, CNDP2, INPP5B, NEU2, SMPD2, NAGLU, AMDHD2, AFMID, NEU1, PDE6A, ENPP3, GGT1, ENPP6, GUSB, ACP1, ARSB, ENTPD4, EPHX2, PDE4C, ACOT12, ACYP2, CMBL, BPGM, FAH, GALNS, MAN1A, GNPDA2, GLB1, RGN, LAP3, PPT2, NIT2	150	1636	36679	5530248573757131	19.4898	4.87244	4.32972
GOTERM_MF_DIRECT	GO:0046872~metal ion binding	50	326797385620915	9.33867	DGKG, CDA, GALNT14, ACSM2, XYLT1, CNDP1, CNDP2, SMPD2, ME1, PGM2, CAR9, ENPP3, TK1, ENPP6, SEPHS2, PDE4C, MCCC1, NME2, SORD, SIRT7, MAN1A, PCCA, RGN, NDUFS1, LAP3, IDO2, BLVRA, DGKH, CYP4A12A, CYP4A12B, FECH, HAAO, ADH5, ACAT1, INPP5B, NFS1, CBS, AMDHD2, PDE6A, ARSB, CYP2J5, GALNT3, GSS, EPHX2, GALNT1, C1GALT1, FAH, SUOX, GALNS, PAH	150	3600	36679	3.3962e+16	3767.65	754.565	670.517
GOTERM_MF_DIRECT	GO:0016757~transferase activity, transferring glycosyl groups	13	849673202614379	72185	B3GALNT2, GALNT14, GALNT3, ST8SIA1, GALNT1, QPRT, C1GALT1, XYLT1, B3GALT5, GYS2, FUT8, MGAT3, UGT2B5	150	210	36679	1513736507936508	2.91627e+08	486045	431907
GOTERM_MF_DIRECT	GO:0042802~identical protein binding	28	1830065359477124	4.22732e+07	CDA, AHCY, SHMT2, HEXB, QPRT, CPOX, SAT2, ADH5, ACAT1, CBS, ME1, ASL, MLYCD, TK1, HADH, ACADS, TPK1, GSS, SORD, ACOT12, NME2, ACYP2, DHRS4, ALDH5A1, GNPDA2, IVD, PAH, DGKH	150	2017	36679	3394519914063791	1.70782e+11	2.43977e+10	2.16801e+10
GOTERM_MF_DIRECT	GO:0042803~protein homodimerization activity	17	1111111111111111	2.32147e+09	CDA, FECH, SHMT2, PANK1, GSS, EPHX2, ODC1, CPOX, ALDH3A2, HSD11B1, NFS1, ACOX1, GLB1, CBS, PNPO, RDH5, DGKH	150	813	36679	511310373103731	9.37829e+10	1.17234e+11	1.04176e+11
GOTERM_MF_DIRECT	GO:0016829~lyase activity	9	588235294117647	3.5732e+08	FECH, CBS, ODC1, CAR9, ASL, CHAC2, MLYCD, CSAD, PISD	150	162	36679	1.35848e+16	1.44347e+12	1.60397e+10	1.42531e+09
GOTERM_MF_DIRECT	GO:0050660~flavin adenine dinucleotide binding	7	457516339869281	6.49129e+08	ACAD8, ACOX1, IVD, AGPS, LDHD, ACOX3, ACADS	150	75	36679	2282248888888889	2.62214e+12	2.62248e+11	2.33037e+11
GOTERM_MF_DIRECT	GO:0016798~hydrolase activity, acting on glycosyl bonds	7	457516339869281	9.52705e+08	NEU2, MAN1A, GLB1, TREH, HEXB, NEU1, GUSB	150	80	36679	2.13961e+16	3.84819e+12	3.49903e+09	3.10928e+11
GOTERM_MF_DIRECT	GO:0000166~nucleotide binding	23	1.50327e+16	1.94529e+09	DGKG, ACSS2, ACSM2, TPK1, PANK1, GSS, GLYCTK, MCCC1, AK2, NME2, NUDT2, AK4, AACS, COASY, PCCA, ETNK2, FPGT, PI4KA, SUCLG1, TK1, SEPHS2, BLVRA, DGKH	150	1724	36679	3262246713070379	7.85589e+10	6.54914e+10	5.81966e+10
GOTERM_MF_DIRECT	GO:0030170~pyridoxal phosphate binding	6	3.92157e+16	3.0542e+10	NFS1, SPTLC1, SHMT2, CBS, PNPO, CSAD	150	55	36679	2.66756e+16	1.23314e+16	9.49153e+10	8.4343e+10
GOTERM_MF_DIRECT	GO:0005524~ATP binding	21	1.37255e+16	4.97656e+10	DGKG, ACSS2, ACSM2, ENTPD4, TPK1, PANK1, GSS, GLYCTK, MCCC1, ACOT12, AK2, NME2, AK4, AACS, COASY, PCCA, ETNK2, PI4KA, TK1, SEPHS2, DGKH	150	1548	36679	3.31722e+16	2.00851e+16	1.43609e+12	1.27613e+12
GOTERM_MF_DIRECT	GO:0016627~oxidoreductase activity, acting on the CH-CH group of donors	5	3.26797e+16	5.7392e+09	ACAD8, ACOX1, IVD, ACOX3, ACADS	150	29	36679	4.21598e+16	2315957727829887	1.54576e+12	1.37358e+11
GOTERM_MF_DIRECT	GO:0008194~UDP-glycosyltransferase activity	5	3.26797e+16	7.55533e+09	B3GALNT2, UGT2B38, UGT2B37, UGT2B5, B3GALT5	150	31	36679	3943978494623656	3.04771e+16	1.8125e+12	1.61062e+11
GOTERM_MF_DIRECT	GO:0016746~transferase activity, transferring acyl groups	8	5228758169934641	7.62688e+09	SPTLC1, NAT8, NAT2, MOGAT1, SAT2, GLYAT, GGT1, ACAT1	150	174	36679	1.12426e+16	3.07653e+16	1.8125e+12	1.61062e+11
GOTERM_MF_DIRECT	GO:0020037~heme binding	8	5228758169934641	1.44491e+11	CYP4A12A, CYP4A12B, CYP2J5, FECH, CBS, CYP2J9, IDO2, SUOX	150	192	36679	1.01886e+16	5.82046e+16	3.24301e+12	2.88179e+10
GOTERM_MF_DIRECT	GO:0016301~kinase activity	13	849673202614379	1.92559e+11	DGKG, TPK1, PANK1, GLYCTK, AK2, NME2, AK4, COASY, ETNK2, PI4KA, TK1, SEPHS2, DGKH	150	666	36679	4773043043043043	7749293063781693	4.09442e+10	3.63836e+11
GOTERM_MF_DIRECT	GO:0016874~ligase activity	7	457516339869281	2.53468e+11	ACSS2, PCCA, ACSM2, GSS, MCCC1, SUCLG1, AACS	150	141	36679	1.21396e+16	1.0188e+16	5.12005e+11	4.54975e+12
GOTERM_MF_DIRECT	GO:0051287~NAD binding	5	3.26797e+16	7.06233e+10	ALDH5A1, AHCY, BDH2, SORD, ME1	150	54	36679	2264135802469136	2.81296e+16	1.35866e+16	1207322459975959
GOTERM_MF_DIRECT	GO:0016831~carboxy-lyase activity	4	2.61438e+16	1.24893e+12	ODC1, MLYCD, CSAD, PISD	150	24	36679	4075444444444445	4920792787046624	2.26469e+16	2.01243e+16
GOTERM_MF_DIRECT	GO:0005506~iron ion binding	7	457516339869281	1.2893e+11	CYP4A12A, CYP4A12B, CYP2J5, FECH, HAAO, PAH, CYP2J9	150	189	36679	9056543209876544	5075763240134745	2.26469e+16	2.01243e+16
GOTERM_MF_DIRECT	GO:0016853~isomerase activity	6	3.92157e+16	2.34532e+12	CYP2J5, AMACR, HSD3B3, CYP2J9, PGM2, BPGM	150	135	36679	1.08679e+16	9041071773843080	394795861294554	3508210747642201
GOTERM_MF_DIRECT	GO:0003995~acyl-CoA dehydrogenase activity	3	1.96078e+16	5.79164e+11	ACAD8, IVD, ACADS	150	9	36679	8150888888888889	2.08678e+16	935928265140083	8316788296665588
GOTERM_MF_DIRECT	GO:0071949~FAD binding	4	2.61438e+16	6.25351e+11	ACOX1, AGPS, LDHD, ACOX3	150	41	36679	2385626016260163	2.23315e+16	9716999911034520	8634660812033151
GOTERM_MF_DIRECT	GO:0050661~NADP binding	4	2.61438e+16	8.22607e+11	DHFR, HSD11B1, ASPDH, ME1	150	45	36679	2.17357e+16	2828497246377134	123086335758156	1.09376e+16
GOTERM_MF_DIRECT	GO:0005504~fatty acid binding	4	2.61438e+16	1.05546e+16	ACOX1, NME2, ACOX3, ADH5	150	49	36679	1996136054421769	3.47295e+16	1.52287e+16	1.35325e+16
GOTERM_MF_DIRECT	GO:0008392~arachidonic acid epoxygenase activity	4	2.61438e+16	1119502055554317	CYP4A12A, CYP4A12B, CYP2J5, CYP2J9	150	50	36679	1.95621e+16	3.63984e+16	1.55958e+16	1.38587e+16
GOTERM_MF_DIRECT	GO:0016790~thiolester hydrolase activity	3	1.96078e+16	2.40308e+16	ALDH6A1, ACOT12, PPT2	150	18	36679	4.07544e+16	6216795728104354	3131759253157801	2782924682880323
GOTERM_MF_DIRECT	GO:0004653~polypeptide N-acetylgalactosaminyltransferase activity	3	1.96078e+16	2.40308e+16	GALNT14, GALNT3, GALNT1	150	18	36679	4.07544e+16	6216795728104354	3131759253157801	2782924682880323
GOTERM_MF_DIRECT	GO:0030145~manganese ion binding	4	2.61438e+16	2.49278e+16	GALNT3, GALNT1, ME1, LAP3	150	66	36679	1481979797979798	6351761937688889	3.14714e+16	2.79659e+16
GOTERM_MF_DIRECT	GO:0030246~carbohydrate binding	6	3.92157e+16	2.86348e+16	GALNT14, GALNT3, GALNT1, HEXB, TALDO1, GUSB	150	236	36679	6216779661016949	6860447543664332	3505592010354198	311511765276524
GOTERM_MF_DIRECT	GO:0004550~nucleoside diphosphate kinase activity	3	1.96078e+16	3921218320447438	AK2, NME2, AK4	150	23	36679	3.18948e+16	7955202411915336	4659330004296368	4140345226590089
GOTERM_MF_DIRECT	GO:0008376~acetylgalactosaminyltransferase activity	3	1.96078e+16	4997148446133	B3GALNT2, B3GALT5, B4GALNT3	150	26	36679	2821461538461539	8678620837182669	5768137063536377	5.12565e+16
GOTERM_MF_DIRECT	GO:0015020~glucuronosyltransferase activity	3	1.96078e+16	6193079497763902	UGT2B38, UGT2B37, UGT2B5	150	29	36679	2.52959e+16	9187141894057098	695001143637949	6175876499159002
GOTERM_MF_DIRECT	GO:0016620~oxidoreductase activity, acting on the aldehyde or oxo group of donors, NAD or NADP as acceptor	3	1.96078e+16	6617864428634001	ALDH3A2, ALDH6A1, ALDH5A1	150	30	36679	2.44527e+16	931608263528233	7225992511265233	642111710778272
GOTERM_MF_DIRECT	GO:0016758~transferase activity, transferring hexosyl groups	3	1.96078e+16	7055534541543249	B3GALNT2, FUT8, B3GALT5	150	31	36679	2.36639e+16	9427621095780336	7501147249430191	6665623422142175
GOTERM_MF_DIRECT	GO:0004553~hydrolase activity, hydrolyzing O-glycosyl compounds	3	1.96078e+16	7969089987648776	GLB1, HEXB, GUSB	150	33	36679	2222969696969697	9605376888240736	7617888072287061	6769360935522413
GOTERM_MF_DIRECT	GO:0016263~glycoprotein-N-acetylgalactosamine 3-beta-galactosyltransferase activity	2	1.30719e+16	810814819575108	C1GALT1C1, C1GALT1	150	2	36679	2.44527e+16	9627105185816734	7617888072287061	6769360935522413
GOTERM_MF_DIRECT	GO:0004085~butyryl-CoA dehydrogenase activity	2	1.30719e+16	810814819575108	IVD, ACADS	150	2	36679	2.44527e+16	9627105185816734	7617888072287061	6769360935522413
GOTERM_MF_DIRECT	GO:0003858~3-hydroxybutyrate dehydrogenase activity	2	1.30719e+16	810814819575108	BDH2, BDH1	150	2	36679	2.44527e+16	9627105185816734	7617888072287061	6769360935522413
GOTERM_MF_DIRECT	GO:0016421~CoA carboxylase activity	2	1.30719e+16	810814819575108	PCCA, MCCC1	150	2	36679	2.44527e+16	9627105185816734	7617888072287061	6769360935522413
GOTERM_MF_DIRECT	GO:0008080~N-acetyltransferase activity	3	1.96078e+16	893287189149092	NAT8, NAT2, SAT2	150	35	36679	2095942857142857	9733534532864000	8202000554914389	7288411384193727
GOTERM_MF_DIRECT	GO:0004180~carboxypeptidase activity	3	1.96078e+16	943332757246161	LAP3, CNDP1, CNDP2	150	36	36679	2.03772e+16	9782720037506532	8469031865054423	7525699107808262
GOTERM_MF_DIRECT	GO:0070330~aromatase activity	3	1.96078e+16	1.10077e+16	CYP4A12A, CYP4A12B, CYP2J5	150	39	36679	1880974358974359	9885727780305024	9667607950392524	8590770431165633
GOTERM_MF_DIRECT	GO:0004497~monooxygenase activity	4	2.61438e+16	1.19187e+16	CYP4A12A, CYP4A12B, CYP2J5, PAH	150	116	36679	8431954022988506	9921252276304648	1.0245e+16	9103878528729106
GOTERM_MF_DIRECT	GO:0008270~zinc ion binding	9	588235294117647	1.37897e+16	CDA, SHMT2, SORD, RGN, CAR9, TK1, ENPP3, BLVRA, ADH5	150	771	36679	2854396887159533	9963382871441924	1.16064e+16	1.03136e+16
GOTERM_MF_DIRECT	GO:0052794~exo-alpha-(2->3)-sialidase activity	2	1.30719e+16	1.6151e+16	NEU2, NEU1	150	4	36679	1.22263e+16	9986097444550616	1.23113e+16	1.094e+16
GOTERM_MF_DIRECT	GO:0004308~exo-alpha-sialidase activity	2	1.30719e+16	1.6151e+16	NEU2, NEU1	150	4	36679	1.22263e+16	9986097444550616	1.23113e+16	1.094e+16
GOTERM_MF_DIRECT	GO:0052796~exo-alpha-(2->8)-sialidase activity	2	1.30719e+16	1.6151e+16	NEU2, NEU1	150	4	36679	1.22263e+16	9986097444550616	1.23113e+16	1.094e+16
GOTERM_MF_DIRECT	GO:0016776~phosphotransferase activity, phosphate group as acceptor	2	1.30719e+16	1.6151e+16	AK2, AK4	150	4	36679	1.22263e+16	9986097444550616	1.23113e+16	1.094e+16
GOTERM_MF_DIRECT	GO:0052795~exo-alpha-(2->6)-sialidase activity	2	1.30719e+16	1.6151e+16	NEU2, NEU1	150	4	36679	1.22263e+16	9986097444550616	1.23113e+16	1.094e+16
GOTERM_MF_DIRECT	GO:0016616~oxidoreductase activity, acting on the CH-OH group of donors, NAD or NADP as acceptor	3	1.96078e+16	1834986788592137	BDH2, HSD3B3, HADH	150	51	36679	1.43839e+16	9994369866859452	1.37284e+16	1.21993e+16
GOTERM_MF_DIRECT	GO:0003997~acyl-CoA oxidase activity	2	1.30719e+16	2.01481e+16	ACOX1, ACOX3	150	5	36679	9781066666666668	9997315771332148	1.47997e+16	1.31512e+16
GOTERM_MF_DIRECT	GO:0008081~phosphoric diester hydrolase activity	3	1.96078e+16	2.56539e+16	PDE4C, PDE6A, ENPP6	150	61	36679	1.20259e+16	99997244787063	1.85074e+16	1.6446e+16
GOTERM_MF_DIRECT	GO:0052869~arachidonic acid omega-hydroxylase activity	2	1.30719e+16	2809395364755672	CYP4A12A, CYP4A12B	150	7	36679	6986476190476192	9999899951470452	1.99122e+16	1.76943e+16
GOTERM_MF_DIRECT	GO:0051536~iron-sulfur cluster binding	3	1.96078e+16	3.0511e+16	NFS1, FECH, NDUFS1	150	67	36679	1.0949e+16	9999963413394994	2087953582911683	1.85538e+16
GOTERM_MF_DIRECT	GO:0070573~metallodipeptidase activity	2	1.30719e+16	3204285201498127	CNDP1, CNDP2	150	8	36679	6113166666666667	9999980685786272	2087953582911683	1.85538e+16
GOTERM_MF_DIRECT	GO:0016868~intramolecular transferase activity, phosphotransferases	2	1.30719e+16	3204285201498127	PGM2, BPGM	150	8	36679	6113166666666667	9999980685786272	2087953582911683	1.85538e+16
GOTERM_MF_DIRECT	GO:0019205~nucleobase-containing compound kinase activity	2	1.30719e+16	3204285201498127	AK2, AK4	150	8	36679	6113166666666667	9999980685786272	2087953582911683	1.85538e+16
GOTERM_MF_DIRECT	GO:0047760~butyrate-CoA ligase activity	2	1.30719e+16	3204285201498127	ACSM2, AACS	150	8	36679	6113166666666667	9999980685786272	2087953582911683	1.85538e+16
GOTERM_MF_DIRECT	GO:0004065~arylsulfatase activity	2	1.30719e+16	3.59758e+16	GALNS, ARSB	150	9	36679	5.43393e+16	9999996271588522	2.23604e+16	1.98697e+16
GOTERM_MF_DIRECT	GO:0102116~laurate hydroxylase activity	2	1.30719e+16	3.59758e+16	CYP4A12A, CYP4A12B	150	9	36679	5.43393e+16	9999996271588522	2.23604e+16	1.98697e+16
GOTERM_MF_DIRECT	GO:0103002~16-hydroxypalmitate dehydrogenase activity	2	1.30719e+16	3.59758e+16	CYP4A12A, CYP4A12B	150	9	36679	5.43393e+16	9999996271588522	2.23604e+16	1.98697e+16
GOTERM_MF_DIRECT	GO:0008430~selenium binding	2	1.30719e+16	39892900717991	SELENBP1, SELENBP2	150	10	36679	4890533333333334	9999999280300634	2.37011e+16	2.10611e+16
GOTERM_MF_DIRECT	GO:0071614~linoleic acid epoxygenase activity	2	1.30719e+16	39892900717991	CYP2J5, CYP2J9	150	10	36679	4890533333333334	9999999280300634	2.37011e+16	2.10611e+16
GOTERM_MF_DIRECT	GO:0004017~adenylate kinase activity	2	1.30719e+16	39892900717991	AK2, AK4	150	10	36679	4890533333333334	9999999280300634	2.37011e+16	2.10611e+16
GOTERM_MF_DIRECT	GO:0004143~diacylglycerol kinase activity	2	1.30719e+16	4379417857846843	DGKG, DGKH	150	11	36679	4445939393939395	9999999861081884	256418089068134	2.27857e+16
GOTERM_MF_DIRECT	GO:0050051~leukotriene-B4 20-monooxygenase activity	2	1.30719e+16	4767971003492377	CYP4A12A, CYP4A12B	150	12	36679	4075444444444445	9999999973186894	2675361507515167	2.37736e+16
GOTERM_MF_DIRECT	GO:0008405~arachidonic acid 11,12-epoxygenase activity	2	1.30719e+16	4767971003492377	CYP2J5, CYP2J9	150	12	36679	4075444444444445	9999999973186894	2675361507515167	2.37736e+16
GOTERM_MF_DIRECT	GO:0018685~alkane 1-monooxygenase activity	2	1.30719e+16	4767971003492377	CYP4A12A, CYP4A12B	150	12	36679	4075444444444445	9999999973186894	2675361507515167	2.37736e+16
GOTERM_MF_DIRECT	GO:0016705~oxidoreductase activity, acting on paired donors, with incorporation or reduction of molecular oxygen	3	1.96078e+16	5.10235e+16	CYP4A12A, CYP4A12B, CYP2J5	150	89	36679	824247191011236	9999999993525408	2740265989357814	2.43504e+16
GOTERM_MF_DIRECT	GO:0008484~sulfuric ester hydrolase activity	2	1.30719e+16	5154955821564204	GALNS, ARSB	150	13	36679	3761948717948719	9999999994824936	2740265989357814	2.43504e+16
GOTERM_MF_DIRECT	GO:0000900~translation repressor activity, nucleic acid binding	2	1.30719e+16	5154955821564204	DHFR, SHMT2	150	13	36679	3761948717948719	9999999994824936	2740265989357814	2.43504e+16
GOTERM_MF_DIRECT	GO:0016805~dipeptidase activity	2	1.30719e+16	5154955821564204	CNDP1, CNDP2	150	13	36679	3761948717948719	9999999994824936	2740265989357814	2.43504e+16
GOTERM_MF_DIRECT	GO:0008404~arachidonic acid 14,15-epoxygenase activity	2	1.30719e+16	5924245600424423	CYP2J5, CYP2J9	150	15	36679	3260355555555556	999999999980725	3068455413553163	2.72667e+16
GOTERM_MF_DIRECT	GO:0102033~cytochrome P450 fatty acid omega-hydroxylase activity	2	1.30719e+16	5924245600424423	CYP4A12A, CYP4A12B	150	15	36679	3260355555555556	999999999980725	3068455413553163	2.72667e+16
GOTERM_MF_DIRECT	GO:0008391~arachidonic acid monooxygenase activity	2	1.30719e+16	6306563061941367	CYP4A12A, CYP4A12B	150	16	36679	3.05658e+16	9999999999962804	3225128451929509	2.86589e+16
GOTERM_MF_DIRECT	GO:0003951~NAD+ kinase activity	2	1.30719e+16	6687337196909703	DGKG, DGKH	150	17	36679	2.87678e+16	9999999999992822	3.37711e+16	3000942567113229
GOTERM_MF_DIRECT	GO:0070403~NAD+ binding	2	1.30719e+16	706657419311148	SIRT7, HADH	150	18	36679	2.71696e+16	9999999999998614	3524562930885232	3131975475712372
GOTERM_MF_DIRECT	GO:0004114~3',5'-cyclic-nucleotide phosphodiesterase activity	2	1.30719e+16	8939916961648908	PDE4C, PDE6A	150	23	36679	2.12632e+16	10	4.35148e+16	3866783360520431
GOTERM_MF_DIRECT	GO:0016747~transferase activity, transferring acyl groups other than amino-acyl groups	2	1.30719e+16	8939916961648908	MOGAT1, ACAT1	150	23	36679	2.12632e+16	10	4.35148e+16	3866783360520431
