# Supplementary material for: Activated Protein C Ameliorates Tubular Mitochondrial Reactive Oxygen Species and Inflammation in Diabetic Kidney Disease
Source: Nutrients. 2022 Jul 29;14(15):3138. doi: 10.3390/nu14153138 (PMC9370435; doi:10.3390/nu14153138)
Supplement: Supplementary file 1 [file nutrients-14-03138-s001.zip › Supplementry File S2.xlsx]

## Sheet: Tabelle1
S.No	Gene	Forward (5’ to 3’)	Reverse (5’ to 3’)
1	mNf-κb	ACACGAGGCTACAACTCTGC	GGTACCCCCAGAGACCTCAT
2	mNlrp3	CGAGACCTCTGGGAAAAAGCT	GCATACCATAGAGGAATGTGATGTACA
3	mCasp1	GATGGCACATTTCCAGGACTGA	TGTTGCAGATAATGAGGGCAAGAC
4	mAsc1	GCTGAGCAGCTGCAAACGAC	ACTTCTGTGACCCTGGCAATGAG
5	mIL-1β	GCCACCTTTTGACAGTGATGAG	ATCAGGACAGCCCAGGTCAA
6	β-Actin	ATCCTGGCCTCACTGTCCACCTTC	AAACGCAGCTCAGTAACAGTCCGC
7	mDrp1	ATGCCAGCAAGTCCACAGAA	TGTTCTCGGGCAGACAGTTT
8	mOpa1	ACCTTGCCAGTTTAGCTCCC	TTGGGACCTGCAGTGAAGAA
9	mHk2	GTGGACGGGACGCTCTAC	TTCACTGTTTGGTGCATGATT
10	mND2	AGGGGCATGAGGAGGACTTA	TGAGTAGAGTGAGGGATGGGT
